# Supplementary material for: Tailored impact of dietary fibers on gut microbiota: a multi-omics comparison on the lean and obese microbial communities
Source: Research Square preprint supplement (doi:10.21203/rs.3.rs-4712683/v1), 2024-08-08
Supplement: Supplementary file 1 [file 50c137051a0a271a35976124.xlsx]

## Sheet: S1 _ Clinical  Data 1
	N	Mean	St.Dev	Mean of STD. ERROR														Participant	6221	7221	8221DE	9221	10221	11221		Group	Lean Mean	Lean Std	Obese Mean	Obese Std
IBM	6	27.7833	7.02863	2.86943				t	gl	Sig. (bilateral)	95% confidence interval							Sex	Female	Male	Male	Male	Male	Female		Age (years)	33	9.5	34	9.2
Basal Metabolism	6	1789.83	369.936	151.026							Inferior	Superior						Age (years)	30	26	44	45	28	41		Height (cm)	171	10	176	7.8
Fat Mass	6	23.5333	11.9934	4.8963			Body Mass Index (BMI)	9.68254	5	0.000199509	20.4072	35.1594						Height (cm)	159	178	175	161	182	171		Weight (kg)	64	11	101	13
Percentage Fat Mass	6	27.5	8.69414	3.54937			Basal Metabolism	11.8512	5	7.53227e-05	1401.61	2178.06						Weight (kg)	51.1	69.8	70.1	96.3	110	91.2		BMI	22	1.3	32	1.6
Free Fat Mass	6	57.9667	12.0219	4.90793			Fat Mass	4.80635	5	0.00485642	10.947	36.1197						BMI	20.2	22	22.8	37.2	33.4	31.1		BMR	1534	292	2141	259
Percentage Free Fat Mass	6	72.5	8.69414	3.54937			Percentage of Fat Mass	7.74786	5	0.000572591	18.3761	36.6239						BMR	1198	1680	1725	1854	2324	1958		Body Fat Mass	13	0.7	34	0.99
Lean Mass	6	55.3333	11.4131	4.65938			Fat-Free Mass	11.8108	5	7.65795e-05	45.3504	70.5829						Body Fat Mass	11.8	12.9	13.1	34.6	33.7	35.1		%Body Fat	20	2.6	34	5.6
Bone Mineral	6	2.63333	0.700476	0.285968			Percentage of Fat-Free Mass	20.4262	5	5.20331e-06	63.3761	81.6239						%Body Fat	23.1	18.5	18.6	35.9	30.5	38.4		LBM	51	10	66	15
Proteins	6	13.5	3.4854	1.42291			Lean Mass	11.8757	5	7.45707e-05	43.356	67.3106						LBM	39.3	56.9	57	61.5	76.8	56.1		%Lean Body Mass	80	2.6	66	5.6
Total Body Water	6	43.85	8.57899	3.50236			Bone Mineral	9.20848	5	0.000253511	1.89823	3.36844						%Lean Body Mass	76.9	81.5	81.4	64.1	69.5	61.6		Muscle Mass	49	10	63	14
Percentage Total Body Water	6	46.8667	21.35	8.7161			Proteins	9.48761	5	0.00021987	9.8423	17.1577						Muscle Mass	37.3	54.3	54.9	58.6	73	53.9		Bone Mineral	2.2	0.32	3	1.1
Energy (kcal)	6	2322.17	642.856	262.445			Total Body Water	12.5201	5	5.76796e-05	34.8469	52.8531						Bone Mineral	2	2.6	2.1	3.1	3.8	2.2		Proteins	11	2.1	17	2.5
Protein (g)	6	97.4667	40.3802	16.4851			Percentage of Total Body Water	5.37702	5	0.00299758	24.4612	69.2721						Proteins	8.5	12.6	11.5	14.5	18.7	15.2		TBW	39	8.7	52	3.8
Carbohydrates (g)	6	261.167	121.015	49.4041			Energy (kcal)	8.84821	5	0.000306448	1647.53	2996.8						TBW	28.8	41.7	45.3	44.1	54.3	48.9		%Body Activity Level	60	4.1	27	31
Simple Carbohydrates	6	80.7667	26.6589	10.8835			Protein (g)	5.9124	5	0.00197154	55.0903	139.843						%Body Activity Level	56.4	59.7	64.6	45.8	49.1	5.6
Dietary Fiber (g)	6	17.35	5.88209	2.40135			Carbohydrates (g)	5.28634	5	0.00322807	134.169	388.164
Soluble Fiber (g)	6	3.3	1.27906	0.522175			Simple Carbohydrates	7.42104	5	0.00069983	52.7898	108.744
Insoluble Fiber (g)	6	7.33333	1.66693	0.680523			Dietary Fiber (g)	7.22509	5	0.000792209	11.1771	23.5229
Total Fat (g)	6	93.1	34.7907	14.2033			Soluble Fiber (g)	6.31972	5	0.00146163	1.95771	4.64229
Saturated Fatty Acids (AGS)	6	37.8333	14.1943	5.79481			Insoluble Fiber (g)	10.776	5	0.00011933	5.58399	9.08267
Monounsaturated Fatty Acids (AGM)	6	34.2	16.9575	6.92286			Total Fat (g)	6.55483	5	0.00123842	56.5894	129.611
Polyunsaturated Fatty Acids (AGP)	6	11.0167	7.69452	3.14128			Saturated Fats (SFA)	6.52884	5	0.00126102	22.9373	52.7294
Polyunsaturated to Saturated Fatty Acids Ratio (AGP to AGS)	6	0.35	0.349857	0.142829			Monounsaturated Fats (MUFA)	4.94015	5	0.00432151	16.4042	51.9958
Ratio of Polyunsaturated to Monounsaturated to Saturated Fatty Acids (AGP to AGM to AGS)	6	1.93333	1.22733	0.501057			Polyunsaturated Fats (PUFA)	3.50707	5	0.0171543	2.94176	19.0916
Cholesterol (mg)	6	334.5	98.0138	40.014			PUFA/SFA Ratio	2.45049	5	0.0579015	-0.0171525	0.717153
Water (g)	6	1790.17	240.909	98.3505			PUFA/MUFA/SFA Ratio	3.85851	5	0.0118979	0.645326	3.22134
Alcohol (g)	6	2.05	5.02145	2.05			Cholesterol (mg)	8.35958	5	0.000400866	231.641	437.359
Vitamin B1 (mg)	6	1.54167	0.937239	0.382626			Water (g)	18.2019	5	9.19977e-06	1537.35	2042.98
Vitamin B2 (mg)	6	1.87167	0.668743	0.273013			Alcohol (g)	1	5	0.363217	-3.21969	7.31969
Niacin Equivalent (mg)	6	39.9333	16.8562	6.88151			Vitamin B1 (Thiamine) (mg)	4.02917	5	0.0100294	0.558095	2.52524
Vitamin B6 (mg)	6	2.11667	0.881854	0.360015			Vitamin B2 (Riboflavin) (mg)	6.85559	5	0.00100888	1.16986	2.57347
Folic Acid (µg)	6	175.667	38.4846	15.7113			Niacin Equivalent (mg)	5.80299	5	0.00214251	22.2439	57.6228
Vitamin B12 (µg)	6	11.1167	6.48858	2.64895			Vitamin B6 (Pyridoxine) (mg)	5.87938	5	0.00202139	1.19122	3.04212
Vitamin C (mg)	6	70.5667	31.2618	12.7626			Folic Acid (µg)	11.1809	5	9.98611e-05	135.28	216.054
Retinol (µg)	6	247.25	142.552	58.1968			Vitamin B12 (µg)	4.19663	5	0.00851718	4.30732	17.926
Carotenoids (µg)	6	697.333	407.755	166.465			Vitamin C (mg)	5.52918	5	0.00265272	37.7594	103.374
Vitamin A Equivalent (µg)	6	403.667	203.263	82.9818			Retinol (µg)	4.24852	5	0.00810328	97.6505	396.85
Pantothenic Acid (mg)	6	5.81667	1.90622	0.77821			Carotenes (µg)	4.18907	5	0.00857953	269.421	1125.25
Biotin (µg)	6	27	10.929	4.46176			Vitamin A Equivalent (µg)	4.86452	5	0.00461489	190.355	616.978
Vitamin D (µg)	6	4.67833	8.10081	3.30714			Pantothenic Acid (mg)	7.47442	5	0.00067692	3.81621	7.81712
Vitamin E (mg)	6	6.01667	3.82278	1.56064			Biotin (µg)	6.05142	5	0.00177691	15.5307	38.4693
Vitamin K	6	52.6833	37.6686	15.3782			Vitamin D (µg)	1.41462	5	0.216326	-3.82295	13.1796
Calcium (mg)	6	918.667	401.878	164.066			Vitamin E (mg)	3.85524	5	0.0119374	2.0049	10.0284
Iron (mg)	6	13	3.48195	1.4215			Vitamin K	3.42586	5	0.0187192	13.1525	92.2141
Iodine (mg)	6	101.8	83.3554	34.0297			Calcium (mg)	5.59937	5	0.00250946	496.921	1340.41
Magnesium (mg)	6	309.167	119.931	48.9615			Iron (mg)	9.14526	5	0.000261961	9.34591	16.6541
Zinc (mg)	6	14.6167	6.77921	2.7676			Iodine (µg)	2.99151	5	0.0303946	14.3239	189.276
Selenium (mg)	6	109.167	56.1118	22.9075			Magnesium (mg)	6.31449	5	0.00146711	183.307	435.026
Sodium (mg)	6	2271.67	1141.32	465.94			Zinc (mg)	5.28135	5	0.00324134	7.50232	21.731
Potassium (mg)	6	3076.67	833.932	340.451			Selenium (µg)	4.76553	5	0.00503469	50.2809	168.052
Phosphorus (mg)	6	1577.83	535.615	218.664			Sodium (mg)	4.87544	5	0.00457111	1073.93	3469.4
Fluoride (mg)	6	258.333	97.2598	39.7061			Potassium (mg)	9.03703	5	0.000277219	2201.51	3951.82
Copper (mg)	6	1.35833	0.471865	0.192638			Phosphorus (mg)	7.21579	5	0.000796943	1015.74	2139.93
Chromium (µg)	6	16.8333	8.64261	3.52833			Fluoride (mg)	6.50613	5	0.00128115	156.265	360.401
Nickel (µg)	6	44.0667	14.5625	5.94512			Copper (mg)	7.05122	5	0.000886485	0.863141	1.85353
Chlorine (mg)	6	2121.5	887.946	362.502			Chromium (µg)	4.77091	5	0.00501078	7.76347	25.9032
Manganese (mg)	6	3.1	1.6769	0.684592			Nickel (µg)	7.41224	5	0.000703696	28.7843	59.3491
C14:0 (Myristic Acid) (g)	6	3.90167	1.96367	0.801667			Chlorine (mg)	5.85238	5	0.00206327	1189.66	3053.34
C16:0 (Palmitic Acid) (g)	6	19.5	6.75574	2.75802			Manganese (mg)	4.52824	5	0.00623553	1.3402	4.8598
C18:0 (Stearic Acid) (g)	6	9.73333	4.32789	1.76686			Myristic Acid (g)	4.86694	5	0.00460514	1.84092	5.96242
C16:1 (Palmitoleic Acid) (g)	6	2.03	1.26618	0.516914			Palmitic Acid (g)	7.07029	5	0.000875517	12.4103	26.5897
C18:1 (Oleic Acid) (g)	6	29.7667	13.9006	5.6749			Stearic Acid (g)	5.50885	5	0.002696	5.19149	14.2752
C18:2 (Linoleic Acid) (g)	6	8.65	6.91513	2.82309			Palmitoleic Acid (g)	3.92715	5	0.011102	0.70123	3.35877
C18:3 (Linolenic Acid) (g)	6	1.45333	0.79666	0.325235			Oleic Acid (g)	5.24532	5	0.00333911	15.1789	44.3545
C20:4 (Arachidonic Acid) (g)	6	0.0733333	0.090701	0.0370285			Linoleic Acid (g)	3.06402	5	0.0279736	1.39302	15.907
C20:5 (Eicosapentaenoic Acid) (g)	6	0.208333	0.358799	0.146479			Linolenic Acid (g)	4.46856	5	0.00658801	0.61729	2.28938
C22:5 (Docosapentaenoic Acid) (g)	6	0.0866667	0.180185	0.0735603			Arachidonic Acid (g)	1.98046	5	0.104517	-0.0218515	0.168518
C22:6 (Docosahexaenoic Acid) (g)	6	0.473333	0.88378	0.360802			Eicosapentaenoic Acid (EPA) (g)	1.42227	5	0.214218	-0.168203	0.58487
AGP_w3_g	6	2.22	1.60225	0.654115			Docosapentaenoic Acid (DPA) (g)	1.17817	5	0.291742	-0.102426	0.275759
AGP_W6_g	6	8.71667	6.91503	2.82305			Docosahexaenoic Acid (DHA) (g)	1.31189	5	0.246557	-0.454137	1.4008
cis Fatty Acids (g)	6	30.8	11.1549	4.55397			Omega-3 PUFA (g)	3.3939	5	0.019379	0.538543	3.90146
trans Fatty Acids (g)	6	2.01667	1.83648	0.749741			Omega-6 PUFA (g)	3.08768	5	0.0272311	1.45979	15.9735
Alanine (mg)	6	3188.83	1732.32	707.218			Cis Fatty Acids (g)	6.76333	5	0.0010735	19.0936	42.5064
Arginine (mg)	6	3359.67	1744.24	712.082			Trans Fatty Acids (g)	2.68982	5	0.0433081	0.0893969	3.94394
Aspartic Acid (mg)	6	5012.33	2321.62	947.796			Alanine (mg)	4.50898	5	0.00634683	1370.87	5006.79
Cysteine (mg)	6	854.833	410.519	167.594			Arginine (mg)	4.71809	5	0.00525155	1529.2	5190.13
Phenylalanine (mg)	6	2969.5	1395.26	569.612			Aspartic Acid (mg)	5.28841	5	0.00322259	2575.95	7448.72
Glycine (mg)	6	2797.33	1650.66	673.877			Cystine (mg)	5.10063	5	0.00376815	424.02	1285.65
Histidine (mg)	6	1852.5	981.94	400.875			Phenylalanine (mg)	5.2132	5	0.00342921	1505.27	4433.73
Isoleucine (mg)	6	3286.17	1676.21	684.31			Glycine (mg)	4.1511	5	0.00890055	1065.08	4529.59
Leucine (mg)	6	5240.17	2455.16	1002.31			Histidine (mg)	4.62114	5	0.00572951	822.017	2882.98
Lysine (mg)	6	4317	2374.83	969.519			Isoleucine (mg)	4.80216	5	0.00487437	1527.09	5045.24
Methionine (mg)	6	1631.33	789.054	322.13			Leucine (mg)	5.22807	5	0.00338714	2663.64	7816.7
Proline (mg)	6	4698.67	2028.08	827.959			Lysine (mg)	4.45272	5	0.00668541	1824.77	6809.23
Serine (mg)	6	3216.83	1475.72	602.462			Methionine (mg)	5.06421	5	0.00388609	803.272	2459.39
Tyrosine (mg)	6	2399.67	1157.8	472.669			Proline (mg)	5.675	5	0.00236514	2570.33	6827
Threonine (mg)	6	2721.67	1432.56	584.841			Serine (mg)	5.33948	5	0.00309057	1668.16	4765.51
Tryptophan (mg)	6	1006.5	525.128	214.383			Tyrosine (mg)	5.07684	5	0.00384471	1184.63	3614.7
Valine (mg)	6	3711.67	1785.02	728.731			Threonine (mg)	4.65369	5	0.00556362	1218.29	4225.05
Glucose (g)	6	7.86667	2.97837	1.21591			Tryptophan (mg)	4.69488	5	0.00536163	455.412	1557.59
Fructose (g)	6	7.98333	3.13523	1.27995			Valine (mg)	5.09333	5	0.00379145	1838.4	5584.93
Sucrose (g)	6	17.7333	7.72701	3.15454			Glucose (g)	6.46976	5	0.0013142	4.74106	10.9923
Lactose (g)	6	11.3167	9.97385	4.07181			Fructose (g)	6.23721	5	0.00155099	4.69311	11.2736
Galactose (g)	6	0	,00000a	0			Sucrose (g)	5.62153	5	0.00246612	9.62433	25.8423
Oxalic Acid (g)	6	0.00333333	0.00516398	0.00210819			Lactose (g)	2.77927	5	0.0389355	0.849754	21.7836
Citric Acid (g)	6	1.36667	0.628257	0.256485			Oxalic Acid (g)	1.58114	5	0.174688	-0.00208593	0.0087526
Malic Acid (g)	6	0.578333	0.138046	0.056357			Citric Acid (g)	5.32845	5	0.00311854	0.707352	2.02598
Lactic Acid (g)	6	1.44833	1.10798	0.45233			Malic Acid (g)	10.262	5	0.000150991	0.433463	0.723204
β-Sitosterol (mg)	6	17.5133	9.5143	3.8842			Lactic Acid (g)	3.20194	5	0.0239433	0.285581	2.61109
Campesterol (mg)	6	2.53333	1.40523	0.573682			Beta-Sitosterol (mg)	4.50887	5	0.0063475	7.52869	27.498
Stigmasterol (mg)	6	4.29333	2.12835	0.868895			Campesterol (mg)	4.41592	5	0.00691826	1.05864	4.00803
Caffeine (mg)	6	1.78333	2.51906	1.0284			Stigmasterol (mg)	4.94114	5	0.00431781	2.05977	6.5269
Theobromine (mg)	6	17.45	30.865	12.6006			Caffeine (mg)	1.73408	5	0.143435	-0.860259	4.42693
							Theobromine (mg)	1.38486	5	0.224705	-14.9408	49.8408

## Sheet: S2 _ Clinical  Data 2
		Normal Weight		Overweight		Total					ANOVA	gl	Quadratic mean	F	Sig.
		Mean	STD.DEV	Mean	STD.DEV	Mean	STD.DEV				Basal Metabolism	1	391682	5.3548	0.0816687
	Basal Metabolism	1534.33	292.141	2045.33	246.871	1789.83	369.936					4	73145.8
	Fat Mass	12.6	0.7	34.4667	0.70946	23.5333	11.9934					5
	Percentage Fat Mass	20.0667	2.62742	34.9333	4.03774	27.5	8.69414				Fat Mass	1	717.227	1444.08	2.86395e-06
	Free Fat Mass	51.0667	10.1904	64.8667	10.7072	57.9667	12.0219					4	0.496667
	Percentage Free Fat Mass	79.9333	2.62742	65.0667	4.03774	72.5	8.69414					5
	Lean Mass	48.8333	9.99266	61.8333	9.95205	55.3333	11.4131				Percentage Fat Mass	1	331.527	28.5717	0.00590444
	Bone Mineral	2.23333	0.321455	3.03333	0.802081	2.63333	0.700476					4	11.6033
	Proteins	10.8667	2.12211	16.1333	2.25019	13.5	3.4854					5
	Total Body Water	38.6	8.67583	49.1	5.10294	43.85	8.57899				Free Fat Mass	1	285.66	2.6149	0.181172
	Percentage Total Body Water	60.2333	4.12593	33.5	24.2184	46.8667	21.35					4	109.243
	Energy (kcal)	2238.33	992.614	2406	163.686	2322.17	642.856					5
	Protein (g)	79.7333	45.4033	115.2	32.7341	97.4667	40.3802				Percentage Free Fat Mass	1	331.527	28.5717	0.00590444
	Carbohydrates (g)	310	159.49	212.333	63.4061	261.167	121.015					4	11.6033
	Simple Carbohydrates	91.2	24.7516	70.3333	28.9403	80.7667	26.6589					5
	Dietary Fiber (g)	17.4667	7.00595	17.2333	6.11337	17.35	5.88209				Lean Mass	1	253.5	2.54906	0.185596
	Soluble Fiber (g)	2.2	0.173205	4.4	0.655744	3.3	1.27906					4	99.4483
	Insoluble Fiber (g)	8.26667	1.79258	6.4	1.0583	7.33333	1.66693					5
	Total Fat (g)	68.4667	26.8882	117.733	21.9685	93.1	34.7907				Bone Mineral	1	0.96	2.57143	0.184074
	Saturated Fatty Acids (AGS)	26.4	7.95047	49.2667	6.9515	37.8333	14.1943					4	0.373333
	Monounsaturated Fatty Acids (AGM)	21.3667	9.23057	47.0333	11.8154	34.2	16.9575					5
	Polyunsaturated Fatty Acids (AGP)	12.5	11.5659	9.53333	2.76466	11.0167	7.69452				Proteins	1	41.6067	8.69826	0.0419994
	Polyunsaturated to Saturated Fatty Acids Ratio (AGP to AGS)	0.483333	0.494402	0.216667	0.0907377	0.35	0.349857					4	4.78333
	Ratio of Polyunsaturated to Monounsaturated to Saturated Fatty Acids (AGP to AGM to AGS)	1.74333	0.901628	2.12333	1.6866	1.93333	1.22733					5
	Cholesterol (mg)	270	83.5045	399	67.55	334.5	98.0138				Total Body Water	1	165.375	3.26473	0.145077
	Water (g)	1761.33	321.256	1819	198.477	1790.17	240.909					4	50.655
	Alcohol (g)	4.1	7.10141	0	0	2.05	5.02145					5
	Vitamin B1 (mg)	0.983333	0.388373	2.1	1.05357	1.54167	0.937239				Percentage Total Body Water	1	1072.01	3.55232	0.13255
	Vitamin B2 (mg)	1.67667	0.693277	2.06667	0.723418	1.87167	0.668743					4	301.777
	Niacin Equivalent (mg)	35.0333	22.8955	44.8333	10.6814	39.9333	16.8562					5
	Vitamin B6 (mg)	2.06667	1.26623	2.16667	0.57735	2.11667	0.881854				Energy (kcal)	1	42168.2	0.0833301	0.787176
	Folic Acid (µg)	193.333	52.5579	158	2	175.667	38.4846					4	506038
	Vitamin B12 (µg)	10.6667	7.11501	11.5667	7.35006	11.1167	6.48858					5
	Vitamin C (mg)	89.5333	35.3386	51.6	10.735	70.5667	31.2618				Protein (g)	1	1886.83	1.20449	0.334056
	Retinol (µg)	273.167	200.206	221.333	93.3024	247.25	142.552					4	1566.49
	Carotenoids (µg)	753	629.51	641.667	100.401	697.333	407.755					5
	Vitamin A Equivalent (µg)	469.667	290.304	337.667	77.106	403.667	203.263				Carbohydrates (g)	1	14308.2	0.97145	0.380118
	Pantothenic Acid (mg)	5.83333	2.95353	5.8	0.6	5.81667	1.90622					4	14728.7
	Biotin (µg)	31.3	12.6242	22.7	9.1526	27	10.929					5
	Vitamin D (µg)	8.42667	10.9863	0.93	1.09986	4.67833	8.10081				Simple Carbohydrates	1	653.127	0.90075	0.396323
	Vitamin E (mg)	7.3	5.20481	4.73333	2.12211	6.01667	3.82278					4	725.092
	Vitamin K	58.5	58.486	46.8667	5.02029	52.6833	37.6686					5
	Calcium (mg)	1047.33	567.131	790	180.175	918.667	401.878				Dietary Fiber (g)	1	0.0816667	0.00188919	0.967414
	Iron (mg)	10.2333	1.45717	15.7667	2.28546	13	3.48195					4	43.2283
	Iodine (mg)	136.8	115.628	66.8	18.0436	101.8	83.3554					5
	Magnesium (mg)	360.667	167.288	257.667	4.04145	309.167	119.931				Soluble Fiber (g)	1	7.26	31.5652	0.00493352
	Zinc (mg)	12.1	5.54887	17.1333	8.06866	14.6167	6.77921					4	0.23
	Selenium (mg)	80.4	34.6981	137.933	64.6901	109.167	56.1118					5
	Sodium (mg)	1945	1338.41	2598.33	1070.06	2271.67	1141.32				Insoluble Fiber (g)	1	5.22667	2.41231	0.195345
	Potassium (mg)	3000.67	1268.86	3152.67	333.578	3076.67	833.932					4	2.16667
	Phosphorus (mg)	1633.67	840.243	1522	43	1577.83	535.615					5
	Fluoride (mg)	286.333	106.66	230.333	99.6009	258.333	97.2598				Saturated Fatty Acids (SFA)	1	784.327	14.0644	0.0199426
	Copper (mg)	1.35	0.736953	1.36667	0.11547	1.35833	0.471865					4	55.7667
	Chromium (µg)	12.8667	9.24464	20.8	7.35323	16.8333	8.64261					5
	Nickel (µg)	50.1667	20.2557	37.9667	2.87112	44.0667	14.5625				Monounsaturated Fatty Acids (MUFA)	1	988.167	8.79126	0.0413485
	Chlorine (mg)	2065	1366.77	2178	305.737	2121.5	887.946					4	112.403
	Manganese (mg)	4.2	1.76918	2	0.519615	3.1	1.6769					5
	C14:0 (Myristic Acid) (g)	2.90333	2.10239	4.9	1.49332	3.90167	1.96367				Total Fat (g)	1	3640.81	6.03989	0.0698701
	C16:0 (Palmitic Acid) (g)	13.6667	3.15013	25.3333	1.44684	19.5	6.75574					4	602.793
	C18:0 (Stearic Acid) (g)	6.26667	1.97315	13.2	2.62298	9.73333	4.32789					5
	C16:1 (Palmitoleic Acid) (g)	1.32667	1.22908	2.73333	1.00664	2.03	1.26618				Polyunsaturated Fatty Acids (AGP)	1	13.2017	0.18671	0.687943
	C18:1 (Oleic Acid) (g)	19.2333	7.25971	40.3	9.87472	29.7667	13.9006					4	70.7067
	C18:2 (Linoleic Acid) (g)	9.73333	10.4644	7.56667	2.55408	8.65	6.91513					5
	C18:3 (Linolenic Acid) (g)	1.37333	1.18496	1.53333	0.404145	1.45333	0.79666				Polyunsaturated to Saturated Fatty Acids Ratio (AGP to AGS)	1	0.106667	0.844327	0.410158
	C20:4 (Arachidonic Acid) (g)	0.146667	0.0665833	0	0	0.0733333	0.090701					4	0.126333
	C20:5 (Eicosapentaenoic Acid) (g)	0.413333	0.442418	0.00333333	0.0057735	0.208333	0.358799					5
	C22:5 (Docosapentaenoic Acid) (g)	0.173333	0.242143	0	0	0.0866667	0.180185				Ratio of Polyunsaturated to Monounsaturated to Saturated Fatty Acids (AGP to AGM to AGS)	1	0.2166	0.118439	0.748064
	C22:6 (Docosahexaenoic Acid) (g)	0.946667	1.13161	0	0	0.473333	0.88378					4	1.82878
	AGP_w3_g	2.90667	2.20003	1.53333	0.404145	2.22	1.60225					5
	AGP_W6_g	9.86667	10.4429	7.56667	2.55408	8.71667	6.91503				Cholesterol (mg)	1	24961.5	4.32758	0.105989
	cis Fatty Acids (g)	24.4333	10.9075	37.1667	8.39663	30.8	11.1549					4	5768
	trans Fatty Acids (g)	1.23333	1.37143	2.8	2.17025	2.01667	1.83648					5
	Alanine (mg)	3296.33	1901.41	3081.33	1962.74	3188.83	1732.32				Water (g)	1	4988.17	0.0699611	0.804463
	Arginine (mg)	3356.33	1621.39	3363	2230.91	3359.67	1744.24					4	71299.2
	Aspartic Acid (mg)	5521.33	2941.67	4503.33	2011	5012.33	2321.62					5
	Cysteine (mg)	771.333	359.027	938.333	521.054	854.833	410.519				Alcohol (g)	1	25.215	1	0.373901
	Phenylalanine (mg)	2894	1603.78	3045	1509.19	2969.5	1395.26					4	25.215
	Glycine (mg)	2658.33	1659.78	2936.33	1999.7	2797.33	1650.66					5
	Histidine (mg)	1698.67	852.519	2006.33	1269.93	1852.5	981.94				Vitamin B1 (mg)	1	1.87042	2.96695	0.160084
	Isoleucine (mg)	3059.67	1791.99	3512.67	1912.87	3286.17	1676.21					4	0.630417
	Leucine (mg)	5326	2935.16	5154.33	2536.18	5240.17	2455.16					5
	Lysine (mg)	4049.33	2418.23	4584.67	2834.91	4317	2374.83				Vitamin B2 (mg)	1	0.22815	0.454497	0.537161
	Methionine (mg)	1790.33	882.617	1472.33	837.65	1631.33	789.054					4	0.501983
	Proline (mg)	4486	2509.88	4911.33	1961.52	4698.67	2028.08					5
	Serine (mg)	3252.33	1767.67	3181.33	1521.83	3216.83	1475.72				Niacin Equivalent (mg)	1	144.06	0.451389	0.538486
	Tyrosine (mg)	2397	1370.55	2402.33	1213.6	2399.67	1157.8					4	319.148
	Threonine (mg)	2611.33	1530	2832	1659.26	2721.67	1432.56					5
	Tryptophan (mg)	800.333	589.147	1212.67	463.455	1006.5	525.128				Vitamin B6 (mg)	1	0.015	0.0154905	0.906954
	Valine (mg)	3867.33	2206.43	3556	1739.17	3711.67	1785.02					4	0.968333
	Glucose (g)	7.5	1.90526	8.23333	4.2595	7.86667	2.97837					5
	Fructose (g)	7.56667	2.22336	8.4	4.3715	7.98333	3.13523				Folic Acid (µg)	1	1872.67	1.3539	0.309275
	Sucrose (g)	20.4667	9.13583	15	6.58711	17.7333	7.72701					4	1383.17
	Lactose (g)	14.8	5.31131	7.83333	13.5677	11.3167	9.97385					5
	Galactose (g)	0	0	0	0	0	0				Vitamin B12 (µg)	1	1.215	0.023221	0.886261
	Oxalic Acid (g)	0.00333333	0.0057735	0.00333333	0.0057735	0.00333333	0.00516398					4	52.3233
	Citric Acid (g)	1.56667	0.46188	1.16667	0.808352	1.36667	0.628257					5
	Malic Acid (g)	0.54	0.185203	0.616667	0.0945163	0.578333	0.138046				Vitamin C (mg)	1	2158.41	3.1647	0.149866
	Lactic Acid (g)	1.49667	1.15846	1.4	1.31149	1.44833	1.10798					4	682.027
	β-Sitosterol (mg)	16.66	14.0323	18.3667	5.21664	17.5133	9.5143					5
	Campesterol (mg)	2.33333	2.10792	2.73333	0.61101	2.53333	1.40523				Retinol (µg)	1	4030.04	0.165207	0.705214
	Stigmasterol (mg)	3.65333	3.06636	4.93333	0.832666	4.29333	2.12835					4	24394
	Caffeine (mg)	2.5333	3.54448	1.0333	1.27017	1.7833	2.51906					5
	Theobromine (mg)	25.3	43.8209	9.6	16.6277	17.45	30.865				Carotenoids (µg)	1	18592.7	0.0915076	0.777347
												4	203182
												5
											Vitamin A Equivalent (µg)	1	26136	0.579373	0.48896
											Pantothenic Acid (mg)	1	0.00166667	0.000366972	0.985634
												5
											Biotin (µg)	1	110.94	0.912561	0.393532
												4	121.57
												5
											Vitamin D (µg)	1	84.3	1.38301	0.304802
												4	60.9539
												5
											Vitamin E (mg)	1	9.88167	0.625554	0.473245
												4	15.7967
												5
											Vitamin K	1	203.002	0.117825	0.748687
												4	1722.91
												5
											Calcium (mg)	1	99330.7	0.561031	0.495489
												4	177050
												5
											Iron (mg)	1	45.9267	12.5027	0.0241018
												4	3.67333
												5
											Iodine (mg)	1	7350	1.07336	0.358709
												4	6847.64
												5
											Magnesio_mg	1	15913.5	1.13661	0.346444
												4	14000.8
												5
											Zinc (mg)	1	38.0017	0.792582	0.423628
												4	47.9467
												5
											Selenium (mg)	1	4965.13	1.84277	0.246164
												4	2694.39
												5
											Sodium (mg)	1	640267	0.436093	0.545105
												4	1.46819e+06
												5
											Potassium (mg)	1	34656	0.0402678	0.850748
												4	860638
												5
											Phosphorus (mg)	1	18704.2	0.0528473	0.829458
												4	353929
												5
											Fluoride (mg)	1	4704	0.441759	0.542633
												4	10648.3
												5
											Copper (mg)	1	0.000416667	0.00149763	0.970985
												4	0.278217
												5
											Chromium (µg)	1	94.4067	1.35318	0.309387
												4	69.7667
												5
											Nickel (µg)	1	223.26	1.06686	0.360012
												4	209.268
												5
											Chlorine (mg)	1	19153.5	0.019529	0.895615
												4	980772
												5
											Magnesium (mg)	1	7.26	4.27059	0.107651
												4	1.7
												5
											C140_g	1	5.98002	1.79849	0.250982
												4	3.32502
												5
											C160_g	1	204.167	33.9806	0.0043147
												4	6.00833
												5
											C180_g	1	72.1067	13.3861	0.0216049
												4	5.38667
												5
											C161_g	1	2.96807	2.35191	0.199909
												4	1.26198
												5
											C181_g	1	665.707	8.86348	0.0408535
												4	75.1067
												5
											C182_g	1	7.04167	0.12138	0.745106
												4	58.0133
												5
											C183_g	1	0.0384	0.0489963	0.83566
												4	0.783733
												5
											C204_g	1	0.0322667	14.5564	0.0188544
												4	0.00221667
												5
											C205_g	1	0.25215	2.57603	0.183764
												4	0.0978833
												5
											C225_g	1	0.0450667	1.53724	0.282796
												4	0.0293167
												5
											C226_g	1	1.34427	2.09954	0.220929
												4	0.640267
												5
											AGP_w3_g	1	2.82907	1.13084	0.347532
												4	2.50173
												5
											AGP_W6_g	1	7.935	0.137311	0.729757
												4	57.7883
												5
											cis Fatty Acids (g)	1	243.207	2.56714	0.184364
												4	94.7383
												5
											trans Fatty Acids (g)	1	3.68167	1.11721	0.350129
												4	3.29542
												5
											Alanine (mg)	1	69337.5	0.01857	0.89819
												4	3.73384e+06
												5
											Arginine (mg)	1	66.6667	1.75303e-05	0.99686
												4	3.80294e+06
												5
											Aspartic Acid (mg)	1	1554486	0.244849	0.646672
												4	6.34876e+06
												5
											Cysteine (mg)	1	41833.5	0.20896	0.671309
												4	200199
												5
											Phenylalanine (mg)	1	34201.5	0.0141044	0.911189
												4	2424885
												5
											Glycine (mg)	1	115926	0.0343297	0.862023
												4	3.37685e+06
												5
											Histidine (mg)	1	141988	0.121382	0.745104
												4	1.16976e+06
												5
											Isoleucine (mg)	1	307814	0.0896069	0.779587
												4	3.43515e+06
												5
											Leucine (mg)	1	44204.2	0.00587533	0.942582
												4	7.52369e+06
												5
											Lysine (mg)	1	429873	0.0619209	0.81574
												4	6.94228e+06
												5
											Methionine (mg)	1	151686	0.204888	0.674268
												4	740335
												5
											Proline (mg)	1	271363	0.053486	0.828453
												4	5.07353e+06
												5
											Serine (mg)	1	7561.5	0.00277965	0.960481
												4	2.72031e+06
												5
											Tyrosine (mg)	1	42.6667	2.54634e-05	0.996215
												4	1.67561e+06
												5
											Threonine (mg)	1	73040.7	0.0286768	0.873746
												4	2.54703e+06
												5
											Tryptophan (mg)	1	255028	0.90776	0.394662
												4	280942
												5
											Valine (mg)	1	145393	0.0368408	0.85714
												4	3.94652e+06
												5
											Glucose(g)	1	0.806667	0.0740968	0.798936
												4	10.8867
												5
											Fructose (g)	1	1.04167	0.0866131	0.783169
												4	12.0267
												5
											Sucrose (g)	1	44.8267	0.706748	0.447843
												4	63.4267
												5
											Lactose (g)	1	72.8017	0.685859	0.454128
												4	106.147
												5
											Galactose (g)	1	0
												4	0
												5
											Oxalic Acid (g)	1	0	0	1
												4	3.33333e-05
												5
											Citric Acid (g)	1	0.24	0.553782	0.498116
												4	0.433383
												5
											Malic Acid (g)	1	0.00881667	0.407864	0.55779
												4	0.0216167
												5
											Lactic Acid (g)	1	0.0140167	0.00915514	0.928375
												4	1.53102
												5
											β-Sitosterol (mg)	1	4.36907	0.0389886	0.853099
												4	112.06
												5
											Campesterol (mg)	1	0.24	0.099654	0.76803
												4	2.40833
												5
											Stigmasterol (mg)	1	2.4576	0.486853	0.523766
												4	5.04793
												5

## Sheet: S3 _ Clinical  Data 3
			Women		Men		Total						Sex	Female		Male		Total
			Mean	STD DEV	Mean	STD DEV	Mean	STD DEV						Mean	Std.dev	Mean	Std.dev	Mean	Std.dev
		BMI Classification	1.5	0.707	1.5	0.577	1.5	0.548					Energy (kcal)	1889.5	861.963	2538.5	503.897	2322.17	642.856
		Age	35.5	7.778	35.75	10.145	35.67	8.595					Protein (g)	60.65	26.7994	115.875	33.5072	97.4667	40.3802
		Height	165	8.48528	174	9.12871	171	9.27362					Carbohydrates (g)	224	80.6102	279.75	144.431	261.167	121.015
		Weight	71.15	28.355	86.55	19.9677	81.4167	21.5237					Simple Carbohydrates	86.1	23.9002	78.1	31.0749	80.7667	26.6589
		BMI	25.65	7.70746	28.85	7.61468	27.7833	7.02863					Dietary Fiber (g)	16.7	9.05097	17.675	5.47136	17.35	5.88209
		Basal Metabolism	1578	537.401	1895.75	294.87	1789.83	369.936					Soluble Fiber (g)	3.4	1.55563	3.25	1.38203	3.3	1.27906
		Fat Mass	23.45	16.4756	23.575	12.2168	23.5333	11.9934					Insoluble Fiber (g)	6.7	0.70711	7.65	2.01577	7.3333	1.66693
		Percentage Fat Mass	30.75	10.8187	25.875	8.74085	27.5	8.69414					Total Fat (g)	74.8	52.6087	102.25	27.5659	93.1	34.7908
		Free Fat Mass	47.7	11.8794	63.1	9.4039	57.9667	12.0219					Saturated Fats (SFA)	33.95	19.7283	39.775	13.8196	37.8333	14.1943
		Percentage Free Fat Mass	69.25	10.8187	74.125	8.74085	72.5	8.69414					Monounsaturated Fats (MUFA)	25.8	18.6676	38.4	17.1038	34.2	16.9575
		Lean Mass	45.6	11.738	60.2	8.74262	55.3333	11.4131					Polyunsaturated Fats (PUFA)	7.75	7.00036	12.65	8.46581	11.0167	7.69452
		Bone Mineral	2.1	0.14142	2.9	0.72572	2.6333	0.70048					PUFA/SFA Ratio	0.23	0.12728	0.41	0.42919	0.35	0.34986
		Proteins	11.85	4.73762	14.325	3.16899	13.5	3.4854					PUFA/MUFA/SFA Ratio	2.42	2.33345	1.69	0.6773	1.9333	1.22733
		Total Body Water	38.85	14.2128	46.35	5.50727	43.85	8.57899					Cholesterol (mg)	291.5	147.785	356	82.9578	334.5	98.0138
		Percentage Total Body Water	31	35.921	54.8	8.82308	46.8667	21.35					Water (g)	1825.5	228.395	1772.5	279.449	1790.17	240.909
													Alcohol (g)	6.15	8.69741	0	0	2.05	5.02145
													Vitamin B1 (Thiamine) (mg)	1.375	1.16673	1.625	0.99121	1.5417	0.93724
													Vitamin B2 (Riboflavin) (mg)	1.315	0.54447	2.15	0.58023	1.8717	0.66874
													Niacin Equivalent (mg)	24.4	12.0208	47.7	13.5684	39.9333	16.8562
													Vitamin B6 (Pyridoxine) (mg)	1.3	0.28284	2.525	0.77621	2.1167	0.88185
													Folic Acid (µg)	145.5	14.8492	190.75	38.5346	175.667	38.4846
													Vitamin B12 (µg)	11.1	11.0309	11.125	5.44143	11.1167	6.48858
													Vitamin C (mg)	63.1	30.6884	74.3	35.4846	70.5667	31.2618
													Retinol (µg)	185.25	176.423	278.25	140.177	247.25	142.552
													Carotenes (µg)	360	280.014	866	370.374	697.333	407.755
													Vitamin A Equivalent (µg)	294.5	173.241	458.25	216.652	403.667	203.263
													Pantothenic Acid (mg)	4	1.69706	6.725	1.34009	5.8167	1.90622
													Biotin (µg)	21.4	6.22254	29.8	12.4421	27	10.929
													Vitamin D (µg)	1.44	1.0748	6.2975	9.92472	4.6783	8.10081
													Vitamin E (mg)	4.25	2.05061	6.9	4.45346	6.0167	3.82278
													Vitamin K	34.4	16.2635	61.825	44.073	52.6833	37.6686
													Calcium (mg)	719.5	307.591	1018.25	444.941	918.667	401.878
													Iron (mg)	11.5	3.9598	13.75	3.56791	13	3.48195
													Iodine (mg)	49.45	12.7986	127.975	93.7287	101.8	83.3554
													Magnesium (mg)	222.5	48.7904	352.5	125.171	309.167	119.931
													Zinc (mg)	8.5	1.27279	17.675	6.21631	14.6167	6.77921
													Selenium (µg)	94.9	75.0947	116.3	56.2519	109.167	56.1118
													Sodium (mg)	2124.5	1802.42	2345.25	1032.69	2271.67	1141.32
													Potassium (mg)	2261.5	898.733	3484.25	474.692	3076.67	833.932
													Phosphorus (mg)	1158.5	532.451	1787.5	455.848	1577.83	535.615
													Fluoride (mg)	226.5	45.9619	274.25	118.525	258.333	97.2598
													Copper (mg)	1.095	0.28991	1.49	0.5232	1.3583	0.47187
													Chromium (µg)	9.3	4.52548	20.6	7.8047	16.8333	8.64261
													Nickel (µg)	31.95	4.03051	50.125	14.1851	44.0667	14.5625
													Chlorine (mg)	1755.5	1092.48	2304.5	884.47	2121.5	887.946
													Manganese (mg)	2.45	0.21213	3.425	2.06135	3.1	1.6769
													Myristic Acid (g)	3.455	3.59917	4.125	1.38173	3.9017	1.96367
													Palmitic Acid (g)	17.45	9.82878	20.525	6.29782	19.5	6.75574
													Stearic Acid (g)	9	1.9799	10.1	5.41972	9.7333	4.32789
													Palmitoleic Acid (g)	1.065	1.03945	2.5125	1.175	2.03	1.26618
													Oleic Acid (g)	23.3	15.6978	33	14.0743	29.7667	13.9006
													Linoleic Acid (g)	6.25	5.58614	9.85	7.97099	8.65	6.91513
													Linolenic Acid (g)	1.21	1.11723	1.575	0.76322	1.4533	0.79666
													Arachidonic Acid (g)	0.045	0.06364	0.0875	0.10751	0.0733	0.0907
													Eicosapentaenoic Acid (EPA) (g)	0.005	0.00707	0.31	0.41617	0.2083	0.3588
													Docosapentaenoic Acid (DPA) (g)	0	0	0.13	0.21587	0.0867	0.18019
													Docosahexaenoic Acid (DHA) (g)	0	0	0.71	1.03814	0.4733	0.88378
													Omega-3 Polyunsaturated Fatty Acids (g)	1.21	1.11723	2.725	1.68597	2.22	1.60225
													Omega-6 Polyunsaturated Fatty Acids (g)	6.3	5.51543	9.925	7.98222	8.7167	6.91503
													Trans Fatty Acids (g)	22.35	12.7986	35.025	9.02122	30.8	11.1549
													Trans Fatty Acids (g)	0.975	1.0253	2.5375	2.04588	2.0167	1.83648
													Alanine (mg)	2401.5	826.608	3582.5	2038.12	3188.83	1732.32
													Arginine (mg)	2757	531.744	3661	2147.82	3359.67	1744.24
													Aspartic Acid (mg)	3737	690.136	5650	2682.9	5012.33	2321.62
													Cystine (mg)	719	322.441	922.75	477.252	854.833	410.519
													Phenylalanine (mg)	2288	1030.96	3310.25	1557.51	2969.5	1395.26
													Glycine (mg)	2200.5	887.419	3095.75	1980.5	2797.33	1650.66
													Histidine (mg)	1499.5	553.665	2029	1174.83	1852.5	981.94
													Isoleucine (mg)	2515	1292.59	3671.75	1879.14	3286.17	1676.21
													Leucine (mg)	3993.5	1515.33	5863.5	2779.7	5240.17	2455.16
													Lysine (mg)	3389	1612.2	4781	2769.85	4317	2374.83
													Methionine (mg)	1414.5	55.8614	1739.75	994.796	1631.33	789.054
													Proline (mg)	3710	1861.11	5193	2173.28	4698.67	2028.08
													Serine (mg)	2444	991.364	3603.25	1644.61	3216.83	1475.72
													Tyrosine (mg)	1791.5	747.412	2703.75	1295.41	2399.67	1157.8
													Threonine (mg)	2095	900.854	3035	1660.47	2721.67	1432.56
													Tryptophan (mg)	534.5	231.224	1242.5	467.968	1006.5	525.128
													Valine (mg)	2788.5	1045.81	4173.25	2023.28	3711.67	1785.02
													Glucose (g)	9.15	5.44472	7.225	1.80439	7.8667	2.97837
													Fructose (g)	9.15	5.86899	7.4	1.88149	7.9833	3.13523
													Sucrose (g)	16.25	8.55599	18.475	8.53869	17.7333	7.72701
													Lactose (g)	5.6	7.9196	14.175	10.5929	11.3167	9.97385
													Galactose (g)	0	0	0	0	0	0
													Oxalic Acid (g)	0.005	0.00707	0.0025	0.005	0.0033	0.00516
													Citric Acid (g)	0.995	0.43134	1.5525	0.67653	1.3667	0.62826
													Malic Acid (g)	0.545	0.20506	0.595	0.12897	0.5783	0.13805
													Lactic Acid (g)	1.445	1.63342	1.45	1.07548	1.4483	1.10798
													Beta-Sitosterol (mg)	7.49	9.91364	22.525	4.2003	17.5133	9.5143
													Campesterol (mg)	1.3	1.83848	3.15	0.80208	2.5333	1.40523
													Stigmasterol (mg)	2.08	2.71529	5.4	0.4397	4.2933	2.12835
													Percentage of Total Body Water	31	35.921	54.8	8.82308	46.8667	21.35
													Caffeine (mg)	1.3	1.69706	2.025	3.06309	1.7833	2.51906
													Teobromine (mg)	14.4	20.3647	18.975	37.95	17.45	30.865

## Sheet: S4 _ Metadata Multi-Omics 
SampleID	short_SampleID	Condition	Obese_lean	Time_point	SubjectID
4636_PL-A-0-CN1	PL-A-0-CN1	Control	Lean	T0	PL-A-CN1
4639_PL-B-0-CN1	PL-B-0-CN1	Control	Lean	T0	PL-B-CN1
4642_PL-C-0-CN1	PL-C-0-CN1	Control	Lean	T0	PL-C-CN1
4645_PO-A-0-CN1	PO-A-0-CN1	Control	Obese	T0	PO-A-CN1
4648_PO-B-0-CN1	PO-B-0-CN1	Control	Obese	T0	PO-B-CN1
4651_PO-C-0-CN1	PO-C-0-CN1	Control	Obese	T0	PO-C-CN1
4654_PL-A-0-A1	PL-A-0-A1	Apple	Lean	T0	PL-A-A1
4657_PL-B-0-A1	PL-B-0-A1	Apple	Lean	T0	PL-B-A1
4660_PL-C-0-A1	PL-C-0-A1	Apple	Lean	T0	PL-C-A1
4663_PO-A-0-A1	PO-A-0-A1	Apple	Obese	T0	PO-A-A1
4666_PO-B-0-A1	PO-B-0-A1	Apple	Obese	T0	PO-B-A1
4669_PO-C-0-A1	PO-C-0-A1	Apple	Obese	T0	PO-C-A1
4672_PL-A-0-P1	PL-A-0-P1	Apple_pectin	Lean	T0	PL-A-P1
4675_PL-B-0-P1	PL-B-0-P1	Apple_pectin	Lean	T0	PL-B-P1
4678_PL-C-0-P1	PL-C-0-P1	Apple_pectin	Lean	T0	PL-C-P1
4681_PO-A-0-P1	PO-A-0-P1	Apple_pectin	Obese	T0	PO-A-P1
4684_PO-B-0-P1	PO-B-0-P1	Apple_pectin	Obese	T0	PO-B-P1
4687_PO-C-0-P1	PO-C-0-P1	Apple_pectin	Obese	T0	PO-C-P1
4690_PL-A-0-C1	PL-A-0-C1	Cellulose	Lean	T0	PL-A-C1
4693_PL-B-0-C1	PL-B-0-C1	Cellulose	Lean	T0	PL-B-C1
4696_PL-C-0-C1	PL-C-0-C1	Cellulose	Lean	T0	PL-C-C1
4699_PO-A-0-C1	PO-A-0-C1	Cellulose	Obese	T0	PO-A-C1
4702_PO-B-0-C1	PO-B-0-C1	Cellulose	Obese	T0	PO-B-C1
4705_PO-C-0-C1	PO-C-0-C1	Cellulose	Obese	T0	PO-C-C1
4708_PL-A-24-CN1	PL-A-24-CN1	Control	Lean	T24	PL-A-CN1
4711_PL-B-24-CN1	PL-B-24-CN1	Control	Lean	T24	PL-B-CN1
4714_PL-C-24-CN1	PL-C-24-CN1	Control	Lean	T24	PL-C-CN1
4717_PO-A-24-CN1	PO-A-24-CN1	Control	Obese	T24	PO-A-CN1
4720_PO-B-24-CN1	PO-B-24-CN1	Control	Obese	T24	PO-B-CN1
4723_PO-C-24-CN1	PO-C-24-CN1	Control	Obese	T24	PO-C-CN1
4726_PL-A-24-A1	PL-A-24-A1	Apple	Lean	T24	PL-A-A1
4729_PL-B-24-A1	PL-B-24-A1	Apple	Lean	T24	PL-B-A1
4732_PL-C-24-A1	PL-C-24-A1	Apple	Lean	T24	PL-C-A1
4735_PO-A-24-A1	PO-A-24-A1	Apple	Obese	T24	PO-A-A1
4738_PO-B-24-A1	PO-B-24-A1	Apple	Obese	T24	PO-B-A1
4741_PO-C-24-A1	PO-C-24-A1	Apple	Obese	T24	PO-C-A1
4744_PL-A-24-P1	PL-A-24-P1	Apple_pectin	Lean	T24	PL-A-P1
4747_PL-B-24-P1	PL-B-24-P1	Apple_pectin	Lean	T24	PL-B-P1
4750_PL-C-24-P1	PL-C-24-P1	Apple_pectin	Lean	T24	PL-C-P1
4753_PO-A-24-P1	PO-A-24-P1	Apple_pectin	Obese	T24	PO-A-P1
4756_PO-B-24-P1	PO-B-24-P1	Apple_pectin	Obese	T24	PO-B-P1
4759_PO-C-24-P1	PO-C-24-P1	Apple_pectin	Obese	T24	PO-C-P1
4762_PL-A-24-C1	PL-A-24-C1	Cellulose	Lean	T24	PL-A-C1
4765_PL-B-24-C1	PL-B-24-C1	Cellulose	Lean	T24	PL-B-C1
4768_PL-C-24-C1	PL-C-24-C1	Cellulose	Lean	T24	PL-C-C1
4771_PO-A-24-C1	PO-A-24-C1	Cellulose	Obese	T24	PO-A-C1
4774_PO-B-24-C1	PO-B-24-C1	Cellulose	Obese	T24	PO-B-C1
4777_PO-C-24-C1	PO-C-24-C1	Cellulose	Obese	T24	PO-C-C1
4780_6221-R1	6221-R1	Donor	Lean	NA	6221-R1
4782_7221-R1	7221-R1	Donor	Lean	NA	7221-R1
4784_8221-R1	8221-R1	Donor	Lean	NA	8221-R1
4786_9221-R1	9221-R1	Donor	Obese	NA	9221-R1
4788_10221-R1	10221-R1	Donor	Obese	NA	10221-R1
4790_11221-R1	11221-R1	Donor	Obese	NA	11221-R1

## Sheet: S5 _ Metagenomics Dataset (KO)
SampleID	4636_PL-A-0-CN1	4780_6221-R1	4782_7221-R1	4784_8221-R1	4786_9221-R1	4788_10221-R1	4790_11221-R1	4639_PL-B-0-CN1	4642_PL-C-0-CN1	4645_PO-A-0-CN1	4648_PO-B-0-CN1	4651_PO-C-0-CN1	4654_PL-A-0-A1	4657_PL-B-0-A1	4660_PL-C-0-A1	4663_PO-A-0-A1	4666_PO-B-0-A1	4669_PO-C-0-A1	4672_PL-A-0-P1	4675_PL-B-0-P1	4678_PL-C-0-P1	4681_PO-A-0-P1	4684_PO-B-0-P1	4687_PO-C-0-P1	4690_PL-A-0-C1	4693_PL-B-0-C1	4696_PL-C-0-C1	4699_PO-A-0-C1	4702_PO-B-0-C1	4705_PO-C-0-C1	4708_PL-A-24-CN1	4711_PL-B-24-CN1	4714_PL-C-24-CN1	4717_PO-A-24-CN1	4720_PO-B-24-CN1	4723_PO-C-24-CN1	4726_PL-A-24-A1	4729_PL-B-24-A1	4732_PL-C-24-A1	4735_PO-A-24-A1	4738_PO-B-24-A1	4741_PO-C-24-A1	4744_PL-A-24-P1	4747_PL-B-24-P1	4750_PL-C-24-P1	4753_PO-A-24-P1	4756_PO-B-24-P1	4759_PO-C-24-P1	4762_PL-A-24-C1
Condition	Control	Donor	Donor	Donor	Donor	Donor	Donor	Control	Control	Control	Control	Control	Apple	Apple	Apple	Apple	Apple	Apple	Apple_pectin	Apple_pectin	Apple_pectin	Apple_pectin	Apple_pectin	Apple_pectin	Cellulose	Cellulose	Cellulose	Cellulose	Cellulose	Cellulose	Control	Control	Control	Control	Control	Control	Apple	Apple	Apple	Apple	Apple	Apple	Apple_pectin	Apple_pectin	Apple_pectin	Apple_pectin	Apple_pectin	Apple_pectin	Cellulose
Obese_lean	Lean	Lean	Lean	Lean	Obese	Obese	Obese	Lean	Lean	Obese	Obese	Obese	Lean	Lean	Lean	Obese	Obese	Obese	Lean	Lean	Lean	Obese	Obese	Obese	Lean	Lean	Lean	Obese	Obese	Obese	Lean	Lean	Lean	Obese	Obese	Obese	Lean	Lean	Lean	Obese	Obese	Obese	Lean	Lean	Lean	Obese	Obese	Obese	Lean
K00001	50946670000000	151648700000000	269904300000000	222747800000000	100723800000000	170159900000000	94831680000000	480390200000000	432748100000000	247009500000000	195479800000000	200092300000000	287583600000000	230888800000000	351763200000000	2738606000000	152929100000000	211473800000000	544160000000000	304081700000000	263211600000000	23174870000000	272197200000000	231583700000000	298809500000000	238067000000000	282599300000000	25481960000000	206451700000000	244151400000000	407109200000000	309201500000000	176622500000000	229174700000000	126378500000000	201046800000000	2081523000000	162341400000000	196452700000000	188851400000000	191152900000000	223919700000000	249699200000000	752227200000000	169701500000000	237782000000000	20924450000000	141073000000000	21557440000000
K00002	315550100000000	164201700000000	173054600000000	186585500000000	676479700000000	542258500000000	140775400000000	288342900000000	236789300000000	129354500000000	12763760000000	130174500000000	998285800000000	991324100000000	257393600000000	15710200000000	919853900000000	154719700000000	273322700000000	166517400000000	161342100000000	13809900000000	146533800000000	10275270000000	199434400000	117932300000000	161918300000000	142981500000000	104039100000000	160822700000000	23793460000000	373845300000000	31	4	3	25	6	5	25	0	0	4	12	5	216052600000000	270599700000000	85	581697300000000	23
K00003	693437100000000	267862200000000	318847300000000	274700400000000	119176400000000	256378900000000	205212600000000	673864900000000	583224700000000	386446600000000	31524520000000	305845200000000	509307200000000	457588300000000	481134600000000	469565900000000	288233600000000	359541200000000	714468000000000	398124200000000	34564230000000	358087600000000	487347000000000	372658800000000	399557600000000	311624800000000	42885930000000	428000200000000	33454240000000	394928700000000	103925400000000	12467050000000	860830600000000	415177600000000	251307400000000	462253700000000	273812000000000	42577540000000	229079600000000	114968100000000	145100200000000	217635500000000	10544280000000	305674500000000	742310700000000	126241200000000	369103900000000	516680700000000	10265980000000
K00004	479285400000000	175196100000000	155084200000000	189599100000000	777376600000000	110304500000000	118644700000000	489761500000000	409432200000000	341075000000000	326944500000000	287482400000000	338278100000000	258967500000000	454330200000000	329856300000000	271331800000000	265422800000000	56468650000000	295053500000000	283036500000000	398511300000000	415836000000000	376401200000000	281780800000000	21687610000000	31788230000000	351995800000000	321914000000000	393256900000000	180851500000000	112935200000000	69451690000000	151985700000000	110081800000000	117473200000000	109226800000000	804100600000000	107566100000000	248027900000000	232190400000000	286545800000000	121628600000000	395422800000000	687771500000000	177031800000000	207354800000000	13115790000000	839398900000000
K00005	172332100000000	788710700000000	11731640000000	483205100000000	419309100000000	905765100000000	389189100000000	168335400000000	139112500000000	113274900000000	981186900000000	910590300000000	171081800000000	119743700000000	142374800000000	148192100000000	920835800000000	108209500000000	167274600000000	967052400000000	832767700000000	106445400000000	136291800000000	104387000000000	936341400000000	81434700000000	989396200000000	132079500000000	983167500000000	115468600000000	571852800000000	559104500000000	244049600000000	4342621000000	290402600000000	409167500000000	170577200000000	158714600000000	105502900000000	364035400000000	448865400000000	526259300000000	268646700000000	894614200000000	943077800000000	861615700000000	555949900000000	380332900000000	308126300000000
K00007	0	0	0	0	0	0	0	0	0	0	0	0	0	0	0	0	0	0	0	0	0	0	0	0	0	0	1	0	0	0	884951800000000	643299900000000	429818000000000	11	479277700000000	283527700000000	36461990000000	502782400000000	228717800000000	778866400000000	824675600000000	124887300000000	202602400000000	5	805944200000000	1	2	400110000000000	262751400000000
K00008	601969600000000	247635300000000	30262720000000	299846400000000	131638100000000	250092400000000	187771200000000	547172300000000	495189400000000	396365800000000	331273000000000	323107600000000	375021900000000	283320400000000	447500500000000	499130100000000	297603000000000	375686900000000	594734500000000	344330100000000	296525700000000	360441400000000	470765800000000	380408500000000	358128400000000	276551300000000	345139700000000	409949500000000	333575700000000	397123800000000	41008970000000	314349000000000	180969400000000	182103200000000	93542620000000	166464800000000	194220500000000	152690300000000	187684700000000	135593000000000	135072500000000	165433100000000	26146700000000	727547300000000	167950900000000	196740200000000	141696700000000	110259100000000	225994100000000
K00009	482458300000000	209742300000000	152018300000000	187013100000000	845460400000000	127859200000000	14884020000000	441267900000000	406040700000000	235159400000000	189464600000000	190423700000000	309201200000000	233017200000000	277179300000000	26758230000000	182685400000000	209271800000000	48220380000000	265522900000000	221706900000000	244601200000000	305203300000000	237178800000000	262654400000000	193140500000000	295173300000000	269657700000000	196433500000000	219949600000000	245467000000000	215065400000000	120278700000000	952036200000000	606325000000000	104147600000000	118940000000000	106991700000000	116423400000000	902698600000000	931220200000000	106824700000000	16679120000000	547013000000000	105893800000000	164832500000000	120079000000000	894926500000000	144690300000000
K00010	483843100000000	346089300000000	326720800000000	214474900000000	185088400000000	166525900000000	116819700000000	464961500000000	466203200000000	574468200000000	467340800000000	444384000000000	257543600000000	226509100000000	389276400000000	523638600000000	195021600000000	405652500000000	413508200000000	223394100000000	235040300000000	560464700000000	696245100000000	516921900000000	337573400000000	239956100000000	278796300000000	627079200000000	467189300000000	577351600000000	153857700000000	205083900000000	787294700000000	409119800000000	271666700000000	577175500000000	266617400000000	351115800000000	417541800000000	35637830000000	340378600000000	688781800000000	698846700000000	13	313558000000000	218353600000000	502028800000000	538693500000000	65447030000000
K00011	3295	1	0	231449000000000	0	0	0	2	1	0	304280600000000	15	31535770000000	1	204893800000000	1	310085400000000	211090000000000	1	106498700000000	305831000000000	2	1	2	0	1	1	1	0	508510100000000	28226080000000	121599600000000	55	1	5	5	817354000000000	72903080000000	868055600000000	672509200000000	111931100000000	103790500000000	6	1	7	0	0	0	117016600000000
K00012	312575400000000	114212300000000	176426800000000	120799300000000	748182200000000	137812600000000	115657200000000	288034100000000	275599200000000	198300500000000	162838700000000	161284200000000	180595200000000	13872960000000	21665420000000	214710100000000	112221100000000	175874900000000	293735300000000	181237200000000	156108700000000	178463200000000	216005200000000	188056500000000	178151300000000	143652000000000	186537900000000	213196400000000	160464400000000	196317600000000	815397700000000	848559000000000	682043800000000	328950100000000	228993600000000	340049900000000	190811500000000	36960700000000	148241600000000	723120300000000	127468900000000	121499800000000	786627200000000	23975730000000	54116690000000	102700800000000	217349600000000	376505400000000	84069060000000
K00013	955715300000000	422816100000000	51479890000000	263127700000000	184149600000000	477599700000000	317738200000000	927344600000000	787381700000000	606941600000000	506460400000000	467510300000000	829593100000000	650661200000000	710284900000000	790908100000000	494244900000000	557773600000000	949293500000000	50233440000000	419960900000000	504782700000000	786432100000000	558614300000000	511869900000000	424322300000000	573114200000000	712997400000000	523532200000000	601420600000000	128804400000000	153580100000000	107088300000000	627661100000000	337801000000000	637682500000000	506693700000000	57349940000000	329915100000000	195687700000000	200269300000000	266299700000000	142284200000000	464451700000000	849901200000000	192072000000000	495925900000000	818929600000000	13142620000000
K00014	827525100000000	298413000000000	426013500000000	333275000000000	138547400000000	302025700000000	220809200000000	801245200000000	680258600000000	445597000000000	355805400000000	347342400000000	636229200000000	575396400000000	58835400000000	54772220000000	398194400000000	4211344000000	879624100000000	471736600000000	394732200000000	393357100000000	548616900000000	393943500000000	472406700000000	362334400000000	498489300000000	476158200000000	38311250000000	452565000000000	126154800000000	140807400000000	811203600000000	370725000000000	23148190000000	428965900000000	392076100000000	41719090000000	300518000000000	104506400000000	149897000000000	211255900000000	105618700000000	30470790000000	567211400000000	135821400000000	377064500000000	584125400000000	106616400000000
K00015	204426400000000	12917270000000	775141000000000	626647300000000	133375	50747760000000	725392200000000	230290700000000	202661400000000	822669200000000	77498670000000	489451200000000	975839500000000	878190400000000	148341400000000	473917300000000	675417000000000	313221500000000	252085000000000	132793100000000	140682600000000	823262000000000	140441800000000	100542600000000	144248800000000	112208400000000	156549000000000	855537900000000	573025100000000	691227700000000	180854700000000	152276500000000	757891400000000	383323900000000	230223800000000	461484500000000	465283400000000	530139700000000	400076600000000	16596250000000	176697600000000	298451300000000	103258300000000	237705700000000	593147300000000	110416800000000	280967700000000	280306200000000	986250000000000
K00016	360035400000000	176171500000000	190526100000000	134813600000000	831647100000000	191267300000000	102406500000000	356673100000000	292667400000000	246920900000000	211960900000000	22052270000000	327501700000000	240537400000000	280296500000000	316778400000000	195510900000000	23981300000000	353287500000000	201473000000000	187118700000000	211718500000000	313250700000000	217338400000000	210188700000000	161994300000000	206310300000000	276693700000000	230480600000000	254535000000000	29774420000000	219621600000000	114831600000000	155126300000000	939560600000000	13263520000000	180566400000000	140069400000000	162424400000000	145595500000000	137978200000000	159547500000000	177032400000000	573543000000000	119509900000000	176357300000000	162461600000000	112573000000000	15592040000000
K00018	234251200000000	748893900000000	740028600000000	614017600000000	222393000000000	639771000000000	485590700000000	243546600000000	205722400000000	111438300000000	981249800000000	963626700000000	130060200000000	107154000000000	141460700000000	104606000000000	752433200000000	894199600000000	260396300000000	145924600000000	130548800000000	119392500000000	131199800000000	108585800000000	137338200000000	109397300000000	149673400000000	10886360000000	102717200000000	11487080000000	390308700000000	458915100000000	348241100000000	971089600000000	688935100000000	130916500000000	642738600000000	107865300000000	520000600000000	205	215052300000000	259287700000000	376078300000000	100196600000000	276417600000000	33100040000000	109371200000000	10903520000000	432012000000000
K00020	9780642000000	343550600000000	480511600000000	15734980000000	193871500000000	426911800000000	214143800000000	967528500000000	777379900000000	495538300000000	432960900000000	400844600000000	759360400000000	75409690000000	486756500000000	691406500000000	547471800000000	479761600000000	99793730000000	463226800000000	420639500000000	474091000000000	713052400000000	442593600000000	487652300000000	403827000000000	479424100000000	641084400000000	475752000000000	574611000000000	342339400000000	204056900000000	877690300000000	812132900000000	392432000000000	626488400000000	687296400000000	424576500000000	276914300000000	422783100000000	394415000000000	55025530000000	109232300000000	210187000000000	392688700000000	249737700000000	44821730000000	781221200000000	113162700000000
K00021	105360200000000	400179700000000	338142800000000	588061700000000	321537600000000	15	7	100500900000000	951584800000000	21	18	20	19	265204800000000	709554900000000	23302780000000	18	104653200000000	981663700000000	596786700000000	519163300000000	697862200000000	247558200000000	17	795064000000000	376448800000000	775424800000000	85225790000000	143176900000000	103333300000000	654611300000000	889935000000000	586178200000000	0	25	6	13720120000000	289761100000000	114219300000000	0	5	0	528772100000000	183040400000000	382058300000000	17	3	6	714335800000000
K00024	898594100000000	351704400000000	544754800000000	229729700000000	108526100000000	628733700000000	263340100000000	981588900000000	720031800000000	439320600000000	387383200000000	329400600000000	110781800000000	762979300000000	630024500000000	716492600000000	447250200000000	433353300000000	898903600000000	502598300000000	379244900000000	295370300000000	728341200000000	395595000000000	412899000000000	446950300000000	609670400000000	615372600000000	395234500000000	500366200000000	314916700000000	410598300000000	365043700000000	182475100000000	982854400000000	177431200000000	141796200000000	193663100000000	104589700000000	47616490000000	510842900000000	652096900000000	475766200000000	146670400000000	353410700000000	430190200000000	96714940000000	158848600000000	453127100000000
K00027	495610300000000	178096400000000	153811500000000	147787800000000	689995400000000	12121560000000	111167300000000	462638100000000	41170340000000	234159900000000	182920200000000	191027100000000	253398500000000	236258300000000	28440170000000	23521140000000	169767600000000	201422800000000	511859200000000	285324200000000	240658300000000	242724500000000	287906800000000	225995800000000	25447110000000	219458000000000	306924600000000	227546300000000	192710500000000	223090700000000	118432500000000	126732600000000	902894600000000	449630700000000	238127200000000	476572800000000	238530900000000	394271200000000	196333400000000	136038600000000	119665200000000	222781600000000	999335400000000	275893600000000	697578300000000	15155810000000	400213700000000	557093900000000	104547600000000
K00029	144646500000000	558037800000000	861797500000000	275541800000000	186891500000000	101673000000000	474864300000000	136107000000000	118179500000000	822241500000000	68837120000000	544572700000000	145857000000000	830702200000000	843542300000000	117870300000000	574766200000000	784328600000000	111183300000000	720716200000000	532563900000000	592890000000000	117753600000000	770942400000000	703681200000000	684106600000000	867551100000000	115239500000000	712854300000000	932834000000000	719603200000000	733432800000000	738564700000000	32691550000000	194982200000000	378745500000000	282540500000000	357384700000000	242737600000000	118827000000000	12419550000000	170196900000000	862657700000000	239425400000	669775200000000	795968900000000	222368800000000	281228100000000	843226500000000
K00030	767279800000000	330289900000000	481368500000000	260214400000000	250041600000000	393603000000000	37921430000000	684089600000000	547492100000000	525995200000000	401788300000000	403202400000000	112438900000000	82758030000000	662592500000000	78263440000000	491903500000000	589247300000000	768717600000000	364655500000000	325195700000000	449940300000000	708989500000000	505669300000000	345273400000000	326662500000000	481007900000000	690920100000000	482982300000000	558748600000000	562856600000000	995980200000000	53348750000000	504441200000000	279997200000000	449625400000000	235578200000000	328373000000000	173333300000000	11	763757100000000	105140000000000	605739300000000	180954100000000	178004000000000	205950500000000	603233400000000	806149200000000	484074300000000
K00031	372403800000000	135883500000000	1832675000000	131457300000000	589492800000000	156718800000000	10381880000000	32099400000000	322408800000000	228479700000000	187252800000000	181409800000000	234651700000000	169114800000000	228368100000000	255903400000000	15442300000000	20848960000000	360237900000000	206902500000000	192271500000000	21460290000000	276071200000000	203858800000000	216836300000000	160313800000000	206996300000000	24191160000000	192747000000000	218593600000000	558213100000000	642929400000000	442539000000000	232934700000000	126191800000000	271994900000000	153497500000000	160741700000000	108644100000000	713080800000000	559600400000000	743150600000000	499401900000000	135867100000000	315569500000000	630614600000000	187545800000000	257950000000000	496201800000000
K00032	0	0	2	0	2	3	0	5	0	0	2	5	1	0	0	0	0	2	0	0	1	428655000000000	244489400000000	228608600000000	1	0	0	3	0	0	121873500000000	442459400000000	144492700000000	1	125126700000000	45	197313100000000	173655100000000	153683300000000	909624600000000	112710500000000	163491800000000	2	1	2	0	5	0	223677100000000
K00033	11998620000000	559592600000000	110055900000000	303621000000000	219071100000000	124328400000000	55311780000000	135344600000000	103662800000000	106061900000000	957253700000000	827438700000000	230989200000000	163380400000000	137966900000000	173090600000000	123818200000000	114253800000000	106535000000000	598771400000000	423896400000000	595763100000000	152442200000000	942036500000000	637895000000000	56383540000000	756694000000000	138402900000000	909591900000000	109758700000000	290466400000000	351189600000000	308507300000000	137556700000000	817155300000000	182511400000000	148502600000000	174310700000000	128361300000000	556718500000000	697295700000000	107625200000000	441925600000000	135702900000000	315606400000000	60695960000000	130850400000000	218865400000000	389882500000000
K00036	962404100000000	445408100000000	771825300000000	288554900000000	117908600000000	861549400000000	420444300000000	931508400000000	682510100000000	714694900000000	56204800000000	539868300000000	155440900000000	109480700000000	915428700000000	115424700000000	77160640000000	770998100000000	727954300000000	464800800000000	314891200000000	477104100000000	111365100000000	699348200000000	397218600000000	400936700000000	530244500000000	100987800000000	648229200000000	725355100000000	473881000000000	400755200000000	331167700000000	170573100000000	911478100000000	18825660000000	160989200000000	16627160000000	131141300000000	472839000000000	61124560000000	892682000000000	323300500000000	115041400000000	289113000000000	377159100000000	105425500000000	136213000000000	377067900000000
K00038	0	5	0	0	0	0	5	0	328399100000000	0	0	15	1	5	0	0	5	0	396672500000000	0	0	1	0	0	0	1	0	0	0	0	0	0	0	0	0	0	0	0	0	0	0	0	0	0	0	0	0	0	0
K00039	0	0	0	0	0	0	0	0	0	0	0	0	0	0	0	0	0	0	0	0	0	0	0	0	0	0	0	0	0	0	137624600000000	180419100000000	95	0	0	151737500000000	45	8965460000000	848168600000000	939974300000000	113987500000000	134103200000000	456586900000000	1	5	0	2	0	381778400000000
K00040	399401400000000	158562400000000	172759500000000	146856200000000	66886580000000	134963700000000	134875200000000	377178100000000	331582300000000	213385600000000	170315000000000	16676870000000	339819600000000	271214000000000	266537000000000	279047400000000	2133546000000	201153300000000	397098600000000	210582500000000	17808890000000	200263300000000	291650800000000	204613400000000	210476500000000	173140100000000	253002600000000	256705300000000	179538400000000	198072400000000	226441600000000	189841100000000	113690100000000	954739000000000	592575000000000	101801800000000	117257400000000	107107700000000	115957900000000	912249400000000	933588200000000	105480800000000	156772700000000	517656500000000	107479900000000	149050900000000	113153400000000	825291700000000	139376100000000
K00041	322890700000000	153319400000000	86554520000000	929875600000000	618623900000000	111280900000000	770624700000000	300393500000000	263657700000000	161155200000000	132552700000000	128461800000000	253348700000000	165755200000000	184930800000000	20944300000000	121921900000000	152900500000000	307558900000000	159291100000000	120047600000000	155676200000000	212242800000000	161575100000000	161901100000000	12909580000000	199358300000000	201745500000000	137836500000000	164274800000000	197659200000000	158297600000000	965170800000000	969712000000000	621721200000000	890655200000000	101347600000000	80224960000000	857271300000000	875165800000000	868201000000000	105697200000000	144247000000000	442887900000000	92934790000000	134581100000000	105755800000000	786221600000000	118889300000000
K00042	976828500000000	472429900000000	438121000000000	15568680000000	16590100000000	438555100000000	332493800000000	100631600000000	782170600000000	569521900000000	531169600000000	439625300000000	81299450000000	836843100000000	567680300000000	820607200000000	646485600000000	597883000000000	937312800000000	415963800000000	43138750000000	564687500000000	843787800000000	558210300000000	483581700000000	419447900000000	504134700000000	733958000000000	534301400000000	652048100000000	32161590000000	222314900000000	856804900000000	627196400000000	399604400000000	532828600000000	422938500000000	55957330000000	266261800000000	487889500000000	577979800000000	553082000000000	122068500000000	208520300000000	336858400000000	806813900000000	667072700000000	587007600000000	171585600000000
K00043	45	2	8	0	0	55	2	857545200000000	10	7	1	1	677338100000000	3	10	5	3	4	55302130000000	3	46887420000000	4	5	35	719261500000000	6	535616400000000	8456	2	5	15	5	1	2	0	1	0	0	333333300000000	0	0	0	4	0	5	1	2	15	2
K00045	125869700000000	6	0	1	25	162996300000000	5	162149100000000	181577400000000	424291800000000	77906980000000	25	333333300000000	0	1	2	5	2	164673300000000	960467600000000	2	525695000000000	3	4	135518300000000	883894700000000	121980700000000	3	1	7	167824600000000	123805100000000	72292000000000	736212700000000	469562600000000	789289200000000	101192200000000	867148000000000	10166750000000	785070300000000	808014600000000	874861000000000	101132200000000	367091800000000	737477700000000	727349800000000	952811600000000	539465900000000	91469860000000
K00048	430912700000000	157225700000000	218157000000000	13811940000000	747892400000000	155572300000000	102670800000000	404604100000000	334114300000000	235712700000000	195680600000000	187387700000000	317627200000000	246131500000000	285094600000000	264306700000000	176494600000000	203176800000000	393004000000000	230008900000000	208242300000000	203275100000000	277244300000000	215610300000000	23726830000000	180836300000000	247276200000000	252209900000000	194498600000000	22114560000000	351607600000000	521991600000000	318979800000000	123707300000000	110615800000000	156678100000000	107024000000000	133089200000000	731640100000000	487572400000000	658194000000000	705633100000000	353308300000000	124015600000000	250484300000000	542728700000000	153875700000000	209446000000000	349674100000000
K00049	0	0	0	0	0	0	333333300000000	0	0	0	0	0	5	0	5	0	0	0	0	833333300000000	333333300000000	0	0	0	0	333333300000000	5	0	0	0	1	0	0	417394200000000	0	0	0	0	0	0	0	0	0	0	0	1	0	0	0
K00050	0	0	0	0	0	0	0	0	0	0	0	0	0	0	0	0	0	0	0	0	0	0	0	0	0	0	0	0	0	0	190327300000000	131384100000000	581233600000000	0	0	0	102558700000000	552459500000000	742660100000000	0	0	0	989936800000000	382664200000000	385506000000000	0	0	0	617470500000000
K00052	444053100000000	13975890000000	195079000000000	147684600000000	683931500000000	155144700000000	134949900000000	4279010000000	379650000000000	254579000000000	210865000000000	204929200000000	312862700000000	240505900000000	295693300000000	288070500000000	181868200000000	216224900000000	443556000000000	246293800000000	202286300000000	233648200000000	320323300000000	254754900000000	234020400000000	192676500000000	27886690000000	284917600000000	214266200000000	252534000000000	597085900000000	799979500000000	475126300000000	292530900000000	187395600000000	317240400000000	17028850000000	229635700000000	106351300000000	658449300000000	876395600000000	122228500000000	635320500000000	197290500000000	357961000000000	887979800000000	251445000000000	325104400000000	546110600000000
K00053	481830900000000	189085900000000	268907800000000	15956480000000	765132800000000	266005600000000	15063650000000	447248200000000	398260200000000	309158400000000	25998920000000	244775200000000	414404800000000	296289100000000	355311200000000	405281300000000	244178400000000	289008400000000	462976700000000	247766500000000	21887810000000	263951900000000	380133500000000	280227800000000	251887800000000	217615900000000	285615400000000	356070300000000	273645700000000	321396600000000	6288335000000	670174600000000	465491300000000	234918200000000	181747900000000	269054100000000	237009700000000	220755000000000	159441800000000	56018610000000	826153500000000	110756800000000	595064300000000	187043300000000	323941300000000	85316610000000	233652800000000	320757900000000	497850500000000
K00054	243261100000000	902538800000000	124221700000000	134101500000000	413567300000000	75	134480100000000	208056700000000	201769600000000	639963100000000	455146400000000	434744700000000	114410400000000	99799650000000	174592100000000	547979700000000	252937700000000	359890000000000	268448200000000	135634000000000	110616600000000	516986000000000	660208900000000	531966000000000	140648800000000	848066200000000	141472700000000	429848400000000	308547000000000	465020000000000	758973000000000	128312500000000	282354800000000	518508700000000	276378300000000	36916460000000	416666700000000	139202900000000	150523300000000	6	125	19	322562500000000	793069900000000	129395700000000	369457800000000	641548700000000	139219100000000	460999700000000
K00055	1423828000	6	124625500000000	16	3	361174400000000	3	349676700000000	186466000000000	167350800000000	173581800000000	149081100000000	178563400000000	160790800000000	13592380000000	433402500000000	386232000000000	250292300000000	299182900000000	118951400000000	207748300000000	151495400000000	29	335591000000000	993441700000000	7	8	262066600000000	215448900000000	103920900000000	251384900000000	14630430000000	8	4	0	45	347014800000000	632663100000000	862399000000000	155650100000000	158782400000000	131260000000000	5	7	5	6	183333300000000	2	139813800000000
K00057	436699200000000	168160200000000	191555600000000	144031500000000	691828100000000	15639440000000	125985100000000	418837400000000	352931900000000	245380100000000	19990820000000	201605400000000	358890500000000	303121900000000	285641300000000	30772980000000	22723680000000	236807300000000	424973900000000	23603720000000	202251500000000	221426500000000	320189400000000	2315943000000	232147900000000	202127100000000	249688000000000	270529200000000	209203400000000	248369400000000	572017300000000	708855100000000	430284100000000	210805800000000	130250900000000	246588000000000	179758800000000	202929700000000	141703600000000	699745100000000	653710800000000	851322200000000	527209400000000	160969700000000	318054400000000	755334200000000	181616600000000	305634200000000	519804800000000
K00058	139963500000000	511730900000000	633065900000000	430227000000000	229219400000000	552514700000000	425301700000000	132750300000000	117493200000000	778845400000000	641806000000000	648336300000000	110965700000000	830406200000000	937524000000000	944949000000000	601609800000000	734584800000000	137988000000000	770148000000000	67496500000000	713641700000000	101344800000000	757000700000000	755645600000000	616365100000000	832796500000000	885928000000000	670607600000000	784165900000000	200025400000000	236776100000000	135597400000000	69108810000000	42300530000000	739280000000000	492503400000000	50160160000000	396448400000000	221797600000000	206623800000000	302918900000000	172218400000000	472908800000000	988845200000000	254575200000000	694871000000000	99968190000000	154311300000000
K00059	97541640000000	425378500000000	517701800000000	362931100000000	688340000000000	747134300000000	167030100000000	532177800000000	602338700000000	310095900000000	175	29650060000000	308258400000000	284545500000000	644974200000000	347137700000000	348640300000000	28219940000000	940281000000000	397509900000000	635403000000000	337795000000000	446836600000000	332954700000000	669464100000000	428602700000000	533146700000000	205264500000000	133636400000000	34991940000000	164823400000000	163936600000000	793316600000000	4	233333300000000	35	562253300000000	565694200000000	641402500000000	101467800000000	161224200000000	128528500000000	773834300000000	166053200000000	385957500000000	854827900000000	171532600000000	194015800000000	699772000000000
K00060	476760900000000	182686300000000	204429000000000	250879900000000	381143400000000	150565800000000	103512500000000	462959100000000	436960200000000	280574700000000	236938800000000	203805100000000	218497600000000	197840500000000	394547100000000	267837500000000	11715400000000	208936100000000	569252200000000	331583300000000	279114500000000	299824300000000	298592700000000	249877100000000	328289600000000	213796800000000	328647100000000	276917600000000	235921100000000	300957300000000	120924900000000	153670900000000	986256300000000	41987390000000	248617400000000	471507800000000	280787800000000	3193199000000	104699700000000	185	172137000000000	332812100000000	769634200000000	192773400000000	493755400000000	911662300000000	281666700000000	409497500000000	991206700000000
K00064	693312400000000	191057400000000	443125100000000	0	5	2	0	549225800000000	661714500000000	2	5	5	144956100000000	817693300000000	183930000000000	0	0	0	644015400000000	0	499765800000000	0	888032500000000	5	251573800000000	386796700000000	881117300000000	3	1	26640620	438650300000000	5	620469900000000	208554300000000	19729890000000	228851300000000	2	2	373732700000000	243715700000000	221644600000000	22916860000000	433333300000000	0	5	675561800000000	208034400000000	754983100000000	296524100000000
K00066	463837900000000	2	150974800000000	5	0	67979700000000	121264700000000	388151200000000	494424600000000	12	140765300000000	204291000000000	75	25	738292000000000	9	373816100000000	174495200000000	560993800000000	194150200000000	294395700000000	102831000000000	633454500000000	138650900000000	327038500000000	395230300000000	492894100000000	118438000000000	115	103221700000000	198310800000000	696295200000000	591792700000000	836180200000000	557844300000000	107051800000000	307032500000000	442259300000000	154413300000000	958230300000000	11	654103500000000	442308100000000	10	634929400000000	16156940000000	5	167035000000000	548913300000000
K00067	567323800000000	243492100000000	26349020000000	256811900000000	123736000000000	19155590000000	172862400000000	572422900000000	489928800000000	314524800000000	249406300000000	244077500000000	464125400000000	38584220000000	382317100000000	373205800000000	283185800000000	28878140000000	585962600000000	327366200000000	278619300000000	291948300000000	394891700000000	292011300000000	320827800000000	259892700000000	330766500000000	348298000000000	269797400000000	300555100000000	229011100000000	194075400000000	126721300000000	331518700000000	240674300000000	375861900000000	123158000000000	113835200000000	121291600000000	189661700000000	212065100000000	263598400000000	185489500000000	582802300000000	109554400000000	116274500000000	336979000000000	43067110000000	148066200000000
K00073	620833000000000	341924100000000	493173800000000	531560000000000	252058300000000	122558600000000	284684400000000	559868500000000	566087800000000	413295600000000	336547000000000	309859900000000	410634500000000	276371800000000	517272300000000	548473700000000	401993500000000	393398000000000	622069500000000	328354100000000	330960800000000	389745300000000	48925680000000	385048300000000	404575200000000	261205100000000	333870100000000	373460100000000	347813900000000	403596700000000	271730200000000	188663300000000	101891200000000	144348500000000	870988900000000	123726200000000	167653500000000	130181300000000	1534689000000	140936400000000	133722300000000	154725700000000	14805820000000	500344100000000	111635500000000	135610800000000	155025800000000	100067300000000	142362400000000
K00074	208055100000000	724843000000000	658830100000000	607157200000000	360360200000000	382824900000000	7473271000000	175392800000000	160384100000000	112452200000000	922466800000000	886630000000000	118230100000000	82242100000000	112526400000000	12148710000000	836004600000000	866472500000000	187347100000000	110038000000000	990736200000000	113024600000000	143498200000000	116109600000000	108363000000000	816086300000000	112643500000000	118780700000000	908027200000000	11249370000000	155378300000000	104084300000000	548931600000000	488258000000000	372234200000000	458971400000000	571742300000000	485986600000000	461291900000000	416962600000000	609453900000000	608541600000000	615861000000000	200598800000000	425484700000000	927915100000000	619827100000000	592229900000000	700593900000000
K00075	499177300000000	176172700000000	242060000000000	157189900000000	773618300000000	205196400000000	144750700000000	477093100000000	426580600000000	289046300000000	229643400000000	223926900000000	409061300000000	32260300000000	343857600000000	349147800000000	240868300000000	27042700000000	530020800000000	271900100000000	249253000000000	264367700000000	35832480000000	27349470000000	272759200000000	203276500000000	312745700000000	313199900000000	249087800000000	284058500000000	646568500000000	827279400000000	501052200000000	34287990000000	175467600000000	309920300000000	221504800000000	202652400000000	146403300000000	113311800000000	116290800000000	154429400000000	675459400000000	204183400000000	359125900000000	992242900000000	26513010000000	413903600000000	627434400000000
K00077	337450600000000	162543100000000	14230870000000	152560000000000	610033800000000	100095700000000	115443800000000	335619200000000	295522500000000	181679000000000	14985360000000	148008600000000	279770700000000	216422700000000	242873600000000	22694210000000	157896200000000	176843900000000	35863960000000	205948400000000	170542000000000	180878000000000	237855400000000	187211800000000	18361270000000	164582300000000	213605800000000	210202700000000	156721700000000	178597900000000	628399000000000	768048000000000	531279400000000	224208800000000	144290100000000	277667200000000	145782200000000	22343340000000	121835000000000	580285800000000	838933700000000	90731630000000	590238900000000	155687700000000	446607900000000	687314900000000	223968400000000	229909500000000	594631900000000
K00082	245016900000000	600216700000000	67447330000000	662650100000000	33922610000000	454890500000000	493480300000000	231385200000000	206006000000000	97663910000000	780458500000000	82279390000000	100399700000000	781613800000000	136466400000000	989896000000000	650064300000000	849379700000000	239535300000000	13957410000000	112849200000000	981183200000000	105807100000000	893235800000000	137180300000000	11582400000000	141488900000000	965798800000000	849182300000000	101751700000000	273385400000000	343916400000000	258052000000000	992439200000000	715381400000000	108728600000000	6014486000000	107913800000000	296528700000000	309180700000000	204732100000000	230221500000000	303777600000000	874854900000000	199800800000000	407728800000000	102169900000000	137231800000000	325924100000000
K00086	133693900000000	308371700000000	632035700000000	506814500000000	11704710000000	354096100000000	253616200000000	121334900000000	124003800000000	502902400000000	411283600000000	401019600000000	572777000000000	478261900000000	829699400000000	473359300000000	240596400000000	412071500000000	138310600000000	77561340000000	805112300000000	474410600000000	52052560000000	453708600000000	796526300000000	646528700000000	740438500000000	459181800000000	440094400000000	505843500000000	23546530000000	327511200000000	200063700000000	586200800000000	419597200000000	674793800000000	71769790000000	794509700000000	423770200000000	362301300000000	43842600000000	472291700000000	205374200000000	520468800000000	141749200000000	320300100000000	796513400000000	106152000000000	223740700000000
K00087	1244557000000	419638800000000	625920100000000	545144100000000	275231600000000	331473600000000	307009900000000	11534660000000	102261100000000	621018000000000	492322800000000	48222430000000	735925100000000	711348800000000	807109500000000	704353700000000	459303900000000	550070400000000	11752780000000	667216000000000	599768200000000	570210900000000	716550800000000	568285300000000	699790400000000	535034200000000	691792400000000	642416100000000	510271900000000	584652000000000	108805300000000	140243700000000	646716900000000	332081800000000	211747700000000	37874920000000	149736300000000	211928700000000	117590400000000	747864700000000	861411100000000	145204800000000	848519600000000	23127920000000	424449800000000	184944000000000	405512600000000	6424035000000	738957800000000
K00088	674221200000000	263143200000000	332728800000000	236944600000000	112892100000000	297331400000000	191710200000000	645029500000000	559303900000000	414725100000000	351183700000000	331908400000000	56270230000000	434570900000000	460620600000000	497594600000000	346124200000000	39481920000000	664080300000000	385905700000000	325152400000000	375797300000000	529776400000000	389376900000000	380492400000000	295898000000000	401360400000000	454723200000000	361776700000000	408361100000000	949923600000000	118817700000000	840053100000000	416518800000000	288337800000000	396624100000000	300324200000000	336266800000000	19428170000000	132879100000000	148226000000000	215569300000000	986442300000000	294809600000000	58887150000000	137980600000000	370953900000000	562621300000000	853841300000000
K00090	0	0	2	0	2	3	0	5	0	0	2	5	1	0	0	0	0	2	0	0	1	428655000000000	244489400000000	228608600000000	1	0	0	3	0	0	121873500000000	442459400000000	144492700000000	1	125126700000000	45	197313100000000	173655100000000	153683300000000	909624600000000	112710500000000	163491800000000	2	1	2	0	5	0	223677100000000
K00091	30669280000000	193102500000000	177318700000000	203488900000000	529845000000000	15912100000000	166516800000000	310453900000000	314460600000000	180321000000000	131025900000000	139117600000000	483846400000000	298528700000000	360570800000000	206229300000000	170970500000000	194187400000000	410405400000000	218513000000000	203272800000000	221501700000000	250868600000000	227853700000000	181025200000000	170282300000000	243103800000000	2387359000000	120902200000000	152371700000000	123345100000000	859500700000000	598050400000000	11	713157900000000	265629000000000	27381750000000	241117100000000	134689600000000	3	2	3	527703800000000	188126400000000	469418400000000	467208700000000	16	516732900000000	593736500000000
K00094	589538400000000	241273200000000	287213900000000	286793500000000	79785570000000	11436810000000	182427400000000	510232000000000	515658200000000	308287200000000	293425500000000	23007970000000	226028800000000	192750000000000	451807100000000	336738500000000	104112400000000	255214500000000	579555400000000	319607600000000	294862000000000	359409000000000	344521500000000	326660700000000	336081200000000	228419200000000	343742100000000	306185300000000	26472850000000	349445600000000	707921900000000	865016700000000	272856800000000	125	4	18322550000000	147793600000000	193690300000000	114069200000000	4	5	536458800000000	358492700000000	162332600000000	220356400000000	153218500000000	252508600000000	537683600000000	392528600000000
K00096	182164400000000	403777200000000	100410700000000	794095000000000	398242300000000	361818300000000	259299400000000	175061800000000	156675200000000	750433300000000	595195900000000	650064300000000	523630000000000	653436600000000	983846900000000	673853600000000	385284100000000	600282700000000	189304700000000	117457200000000	103924500000000	733059200000000	749522600000000	730783300000000	11013130000000	774177600000000	102208900000000	633549900000000	555433000000000	679175600000000	151191300000000	20657590000000	11980530000000	478964000000000	223694400000000	355349100000000	105	287234400000000	17510780000000	45	9	316666700000000	126485000000000	359777700000000	86179470000000	789035400000000	282233400000000	340350500000000	123184800000000
K00097	145291400000000	287951900000000	387670300000000	357079500000000	122479900000000	27314710000000	181502700000000	132061500000000	120024600000000	523377900000000	460141400000000	399870400000000	555002400000000	427793200000000	677449800000000	471062600000000	182565600000000	371634400000000	13559810000000	818976100000000	705424000000000	521594900000000	53809640000000	496622700000000	798803100000000	599567900000000	810647200000000	500143400000000	411844300000000	547915200000000	16574280000000	118121400000000	797817200000000	132556200000000	986819300000000	123180600000000	112935000000000	937658000000000	102073500000000	111088300000000	104835900000000	122716800000000	128003400000000	390379000000000	860959800000000	139919000000000	132150800000000	87048780000000	109747300000000
K00098	12	0	124264300000000	133333300000000	1	0	0	963246600000000	5	1	0	0	525435900000000	1	0	0	0	0	5	62818670000000	833333300000000	1	0	0	214965700000000	1	9	0	2	4	109288700000000	716757700000000	399534000000000	688655100000000	498963000000000	643720400000000	701267200000000	488780800000000	674787800000000	719051500000000	800589000000000	898827100000000	709929300000000	268479100000000	548228600000000	57996260000000	820548800000000	484982400000000	566767200000000
K00099	484222200000000	203006000000000	217453000000000	147809200000000	792997100000000	190372400000000	147168900000000	500175600000000	39759980000000	281942000000000	227188800000000	229803100000000	392226900000000	331671000000000	338942300000000	342718100000000	237436100000000	261128200000000	501448300000000	266865700000000	234402900000000	251435500000000	364390200000000	262494200000000	25406130000000	225631000000000	301147000000000	314630200000000	235155600000000	264888900000000	692196300000000	878842900000000	584243800000000	286344300000000	136475700000000	283546300000000	194650000000000	250099000000000	185366200000000	902067900000000	7892606000000	121905900000000	730962900000000	21729030000000	422005600000000	854930300000000	242386400000000	338653300000000	674449500000000
K00100	394627700000000	109215500000000	16072750000000	140109700000000	554255100000000	107489000000000	734610300000000	377525700000000	341818300000000	165724600000000	137403600000000	129552800000000	22228240000000	203708000000000	23870970000000	16794380000000	101227800000000	134906900000000	403257900000000	23671380000000	202529800000000	164943200000000	212541200000000	157746000000000	230525500000000	176390100000000	224756100000000	18401270000000	138699500000000	160902200000000	670208400000000	760015700000000	584668300000000	337603600000000	167798900000	292102500000000	204437900000000	280057600000000	141380900000000	784037300000000	899844200000000	150188700000000	743264100000000	214786800000000	54743990000000	132871700000000	309146300000000	389271000000000	628124400000000
K00101	10	495238100000000	3625	0	0	0	3	1	45	157692300000000	0	1	9	3	7	357692300000000	157692300000000	5	0	157692300000000	1	15	4	3	1	1	4	0	23125	13125	184265500000000	688806300000000	307015700000000	366666700000000	2	3	321856600000000	300354200000000	170393200000000	237015500000000	196384600000000	470074600000000	13	0	0	0	254255900000000	2	295017400000000
K00102	515569000000000	181916700000000	351423900000000	346339500000000	12040900000000	158256600000000	139440600000000	552628600000000	415073400000000	287606200000000	174007200000000	158875100000000	673180600000000	545506700000000	334646800000000	409100100000000	252884600000000	333577400000000	386104700000000	261467500000000	163363000000000	186172700000000	378496400000000	207242000000000	203270900000000	19054090000000	242933600000000	417560500000000	226360500000000	235473800000000	229219700000000	163280400000000	155845700000000	794766300000000	434456100000000	685153100000000	367214300000000	269951100000000	29	345681800000000	285406600000000	442196100000000	145520800000000	297502600000000	463479300000000	165552100000000	560585000000000	569745700000000	151360700000000
K00103	0	0	0	0	0	0	0	3	0	0	0	0	0	0	0	0	0	0	0	0	0	0	0	0	0	0	0	0	0	0	812887100000000	183905700000000	811356600000000	0	0	0	357880400000000	686297000000000	2	0	0	0	0	0	0	0	0	0	160839300000000
K00104	1566289000000	519893500000000	765545000000000	529350000000000	284232600000000	266077100000000	353753600000000	148223800000000	129790200000000	572745600000000	440756900000000	478010100000000	140401200000000	119459300000000	999611400000000	736464100000000	473429500000000	597968500000000	140758900000000	844750300000000	661049100000000	469127900000000	734668400000000	496895200000000	821341600000000	578456100000000	911452000000000	782385200000000	503738400000000	619708700000000	332380800000000	262205400000000	169142500000000	180476400000000	107385300000000	133336500000000	858888400000000	894789300000000	842446200000000	62891580000000	707126400000000	129917900000000	24503270000000	548556400000000	107702700000000	128650000000000	232589400000000	413299000000000	15516330000000
K00105	0	1	4	0	0	0	0	1	5	770502900000000	0	7	0	0	0	0	0	0	5	0	2	0	1	2	1	1	0	2	765399900000000	11660970000000	118655100000000	45523230000000	974103200000000	6	1	1	4	69045200000000	0	0	0	0	203672000000000	1	5	114179800000000	1	4	186189700000000
K00108	182358400000000	0	171610200000000	25	0	0	0	62851640000000	7	0	0	0	13639180000000	181464000000000	12	0	0	0	274875100000000	20	112272100000000	0	0	0	12	9	10	0	0	1	501657600000000	11654080000000	584739400000000	15	0	4	40205790000000	503038500000000	132549500000000	215591000000000	210131000000000	204601000000000	102599400000000	1	65	0	3	1	391732700000000
K00111	444534000000000	120649800000000	176004600000000	138812200000000	528805300000000	102105900000000	970177900000000	44959690000000	370349200000000	187331100000000	158893800000000	140034700000000	32240200000000	270216000000000	305558600000000	223306000000000	188675600000000	167440100000000	488837900000000	277335800000000	213634500000000	173089900000000	234387300000000	172733600000000	243843300000000	194072500000000	276271000000000	187859100000000	142644300000000	17937990000000	822697000000000	804414600000000	445585400000000	173933200000000	925861500000000	174887900000000	138995600000000	198305900000000	121948800000000	534602200000000	740108900000000	108108800000000	4963222000000	149352400000000	254011200000000	665255100000000	206242200000000	236828600000000	537525200000000
K00112	129126000000000	178260400000000	122006600000000	0	217972400000000	45	13711060000000	158714000000000	137189200000000	182216200000000	8	85	159526300000000	308767800000000	45	5	10	633333300000000	156972800000000	101035300000000	663277600000000	105	25288310000000	174967000000000	642259800000000	932120200000000	158491400000000	177178200000000	5	146385400000000	90942180000000	748146100000000	631584100000000	22	116666700000000	255	319939200000000	132282300000000	140915500000000	29950180000000	19450180000000	334639500000000	776971900000000	267495100000000	465163400000000	473222500000000	30534010000000	9	5631015000000
K00113	125274300000000	594429800000000	116239400000000	136678300000000	540469000000000	197236800000000	582020100000000	113916100000000	102314000000000	687156500000000	513025300000000	571834700000000	542785600000000	451725400000000	111488200000000	945730800000000	674969400000000	687318800000000	124370500000000	76119700000000	613958900000000	660552000000000	748161200000000	686341500000000	791853900000000	605650200000000	666003300000000	672384900000000	572114200000000	603450900000000	110675800000000	168327200000000	931416500000000	533877400000000	276814700000000	463777900000000	309558800000000	333099600000000	18	299926400000000	324830800000000	408135700000000	105241100000000	26649380000000	453633200000000	185001100000000	626766400000000	836307200000000	113319700000000
K00114	0	0	0	0	0	0	0	0	0	0	0	0	0	0	0	0	0	0	0	0	0	0	0	0	0	0	0	0	0	0	987222100000000	144090900000000	11	0	0	0	4	6	0	0	0	0	0	0	0	0	0	0	8
K00116	1	0	0	0	2	0	0	5	6	0	0	1	1	1	1	0	3	1	35847150000000	1	0	3	0	1	1	1	227864800000000	4	1	0	220171200000000	8854654000000	425295000000000	213598500000000	5	7	30600680000000	512572100000000	335350900000000	302080900000000	269284300000000	55985590000000	252141900000000	429385100000000	910906200000000	722962600000000	7	9	386709500000000
K00117	3	0	0	0	3	0	0	5	2	2	3	2	1	2	1	1	0	2	0	1	0	2	5	1	0	0	0	6	35	4	167450600000000	417462600000000	381491700000000	105	4	13500780000000	300169100000000	25	219860900000000	391907000000000	260459900000000	501134300000000	123340300000000	4	11	161162500000000	34	522236500000000	232321000000000
K00118	280718300000000	135492200000000	41599660000000	13040900000000	673839900000000	735965300000000	1	291755000000000	461968500000000	175151700000000	103880400000000	556602600000000	24930660000000	220916200000000	359356900000000	135137400000000	13282580000000	191959600000000	460686000000000	253333300000000	316972600000000	129899700000000	850654500000000	149239700000000	314193100000000	203226500000000	143365500000000	153527900000000	205557200000000	107580800000000	4	83313190000000	3	2	0	35	15	1	5	1	0	0	2	1	3	471052600000000	1	0	35
K00121	362952700000000	155	125	3	0	4	3	348560500000000	609204800000000	215847500000000	230932400000000	264300500000000	27	182924200000000	10319510000000	195	774824900000000	143598100000000	72	47	723628600000000	39829960000000	223638000000000	35	44	19	13	27	323039700000000	422860600000000	808084400000000	246237400000000	151529700000000	3	3	25	278995200000000	290267000000000	166139700000000	127236200000000	19109710000000	178922700000000	13	1	579781600000000	11	15	7	105
K00122	0	0	0	0	0	0	0	0	0	0	0	0	0	0	0	0	0	0	0	0	0	0	0	0	0	0	0	0	0	0	116480500000000	23	11	0	0	0	3	845390100000000	0	0	0	0	0	0	0	0	0	0	11
K00123	219540900000000	958906400000000	108414800000000	122188900000000	945040600000000	664578400000000	547501900000000	209084800000000	177867200000000	143020900000000	115521100000000	126367800000000	173407600000000	131041300000000	165283200000000	171603300000000	169293300000000	140484100000000	240923500000000	135687900000000	125352300000000	132282800000000	161441700000000	131733000000000	118712500000000	994647200000000	117275100000000	156728800000000	13625560000000	141181600000000	966366600000000	729175900000000	57873800000000	161952000000000	110416500000000	183022700000000	20108240000000	251375500000000	136677500000000	978150200000000	910773400000000	203779600000000	41146330000000	142592200000000	195507300000000	81893970000000	248067100000000	271687900000000	46821580000000
K00124	509409500000000	915414100000000	227341200000000	215712600000000	429996400000000	881762900000000	246692000000000	434213800000000	324774400000000	25270160000000	161556100000000	12662670000000	417264800000000	352053900000000	273925800000000	310682800000000	294746900000000	214520500000000	615148200000000	244053800000000	214216000000000	230462200000000	38308860000000	267519200000000	214768700000000	207532700000000	27042000000000	265215000000000	18160040000000	201243800000000	201793600000000	145546100000000	128522400000000	541049600000000	281548000000000	610709300000000	441928100000000	454121300000000	347564100000000	278147100000000	381182400000000	315832800000000	990624400000000	242098000000000	576274700000000	136607600000000	544901500000000	625160200000000	112392400000000
K00125	199242500000000	385413700000000	119360000000000	193183200000000	243244700000000	120196000000000	698241600000000	158606400000000	238501700000000	47443790000000	387058400000000	2352325000000	103105800000000	826145900000000	143703800000000	318319900000000	257642500000000	247820900000000	234576000000000	140210700000000	142788200000000	343551200000000	31295810000000	274948900000000	190497900000000	105682600000000	126566700000000	220077600000000	254318800000000	305382600000000	44	626796600000000	422650300000000	85	640170300000000	528326400000000	1	3	0	0	5	2	16	8	3	281344700000000	4	4	270591300000000
K00127	144135100000000	13901960000000	624239600000000	639388400000000	116666700000000	2	110464900000000	18245870000000	152553900000000	262832100000000	205	116666700000000	942783300000000	10261390000000	880910700000000	318498000000000	264225000000000	116308400000000	155216000000000	110605900000000	657187700000000	233556500000000	358635200000000	164083500000000	559985700000000	720899500000000	946847300000000	298632700000000	212565600000000	204190800000000	112512500000000	828403500000000	82013320000000	350882300000000	11120830000000	251462400000000	244247800000000	284688100000000	109258600000000	153631600000000	908646900000000	156370700000000	752840500000000	324822500000000	263318100000000	537695200000000	244151300000000	166655300000000	637078300000000
K00128	243663600000000	115359000000000	106626000000000	973173100000000	424824100000000	651883700000000	693275300000000	238331400000000	202783100000000	109121800000000	856383200000000	900149300000000	195579200000000	157312900000000	178374900000000	13964840000000	81419960000000	108239900000000	266304300000000	141604200000000	123470700000000	102402000000000	143272000000000	107834800000000	131924100000000	108579200000000	143601800000000	127436800000000	996412100000000	105493000000000	10282990000000	615280700000000	341976200000000	144375800000000	881343500000000	141531700000000	148535800000000	235418700000000	98594750000000	651662100000000	765019100000000	977705600000000	316513300000000	103411500000000	160605700000000	649916900000000	173503400000000	232688400000000	358607700000000
K00129	173318300000000	186069700000000	577444700000000	781497900000000	495755800000000	510418300000000	70267690000000	146469000000000	113606200000000	127359400000000	111634100000000	108294600000000	281060400000000	188101300000000	203473400000000	243017000000000	164080200000000	162704600000000	160078000000000	769032400000000	768682700000000	109565600000000	231925700000000	183450300000000	791379800000000	718903100000000	7039824000000	203459400000000	131789800000000	133480600000000	49302450000000	388333300000000	243333300000000	505095500000000	8	16	419770100000000	303221000000000	201892400000000	27391150000000	196002500000000	199623200000000	256682600000000	10	14	336355100000000	112952000000000	205653700000000	225850600000000
K00130	910891100000000	530500600000000	181981200000000	194215500000000	0	552456800000000	549076000000000	119741300000000	766169000000000	901865000000000	717183000000000	610471700000000	244535400000000	390943100000000	69085610000000	598430500000000	217794500000000	513720600000000	690031600000000	514877000000000	19794500000000	847380100000000	795045700000000	527736000000000	570190100000000	470880000000000	563623100000000	638090300000000	568330100000000	774832500000000	231388900000000	86571950000000	700509600000000	0	0	2	154293900000000	493877800000000	231542500000000	4	57027030000000	14	130274800000000	2	582868500000000	215042400000000	3	3	702495900000000
K00131	153989300000000	26	54	674926500000000	11	10	55	137602000000000	147045800000000	42961620000000	27	440821400000000	46571990000000	46	777985300000000	496050000000000	744326500000000	426409500000000	129223200000000	103732400000000	124531600000000	45	444632200000000	494417500000000	136503200000000	692700400000000	665547900000000	233948800000000	323641200000000	407195800000000	701937200000000	16	8	3	3	3	125542800000000	7	3	3	1	3	5	3	25	65	4	5	145926200000000
K00132	291795100000000	232148900000000	566465500000000	2561357000000	159606700000000	257566000000000	6	40	255	148758800000000	115	65	41797170000000	180437400000000	488453200000000	188519500000000	175	233067100000000	29	17	133333300000000	878036200000000	165	133692200000000	861418400000000	11	232796100000000	17	119163500000000	11	13	165	171434100000000	215423700000000	35	333333300000000	703260900000000	25	536289400000000	0	1	0	8	1	6	12	3	333333300000000	8
K00133	472612200000000	172094200000000	238425600000000	150049900000000	776044900000000	193549500000000	129409300000000	463234800000000	385751900000000	272067900000000	22121920000000	22155750000000	360039500000000	270450800000000	317651600000000	336345900000000	199098600000000	24639770000000	456499400000000	25915380000000	222797500000000	238297300000000	334856100000000	249332700000000	253044200000000	221157600000000	280704500000000	285398400000000	230901200000000	264311000000000	736807600000000	802854800000000	490624000000000	282413900000000	124255500000000	291231200000000	190266000000000	198804700000000	135166100000000	965647100000000	114483600000000	14358440000000	610576700000000	176528900000000	370253100000000	766791200000000	191537900000000	27650420000000	53249800000000
K00134	869429700000000	330414900000000	43508940000000	291128600000000	141131700000000	348726300000000	252101500000000	812760800000000	72012260000000	516958900000000	41821610000000	407735900000000	615019000000000	443800200000000	588435500000000	623679200000000	354533100000000	477686000000000	831003700000000	476137300000000	40884300000000	466582500000000	618466100000000	47821890000000	475507100000000	395847400000000	5208205000000	55105290000000	429839100000000	501368900000000	119803400000000	133967300000000	733743100000000	382671000000000	19329540000000	438459200000000	256445600000000	340010600000000	185733600000000	127703600000000	113295800000000	162227600000000	918270400000000	25170850000000	481927400000000	123654900000000	314038800000000	421061100000000	775959800000000
K00135	683861700000000	120086200000000	386934900000000	435316300000000	134270200000000	167152400000000	198441600000000	63037310000000	52852110000000	55101480000000	26405550000000	172591800000000	59759370000000	271964100000000	514544500000000	333056900000000	331280100000000	27	720017800000000	446863800000000	297010500000000	296666700000000	371189500000000	40876750000000	305928100000000	16811780000000	389885600000000	456896200000000	217731600000000	2308984000	221950800000000	142366500000000	964531400000000	113333300000000	116047900000000	186550400000000	370480600000000	819374300000000	313347700000000	475426100000000	740829300000000	805483900000000	322830800000000	134185800000000	224782000000000	22	8	14	716085300000000
K00137	5	1	0	0	0	2	0	0	0	0	15	0	1	0	0	1	0	2	0	0	1	327435900000000	0	1	0	0	1	3	102796700000000	1	845735400000000	264551700000000	132556500000000	2	0	15	21033950000000	179218800000000	139700700000000	152579900000000	170816000000000	241626300000000	6	1	2	0	0	0	9
K00138	0	0	0	0	0	0	0	3	0	0	0	0	0	1	0	0	0	0	0	0	0	0	0	5	0	0	0	0	0	0	168769300000000	398042200000000	243080000000000	0	0	1	13	312481800000000	0	3	681053500000000	703358600000000	1	1	0	0	1	0	21
K00140	309617600000000	147276800000000	225623000000000	240101100000000	509799100000000	382333600000000	123392700000000	261226600000000	240922000000000	124710900000000	137912000000000	123121400000000	207407800000000	125265700000000	222061000000000	129853400000000	603430700000000	848498400000000	241689000000000	1235914000000	11763230000000	109843900000000	140889800000000	897368800000000	174099100000000	114876200000000	162113600000000	115976200000000	102858700000000	125301800000000	390218200000000	141814100000000	676716100000000	736553500000000	8	205	342033600000000	622450700000000	11	127487000000000	229326400000000	327790500000000	17	3	8	184125000000000	8	226684200000000	653409600000000
K00141	0	0	0	0	0	0	0	0	0	0	0	0	0	0	1	0	0	0	0	0	0	0	0	0	0	0	0	0	1	0	369341700000000	114980700000000	97056	1	1	4	7	112159700000000	144554300000000	121701400000000	147093600000000	351083100000000	65	4	2	0	4	0	535795800000000
K00142	1	5	0	0	0	0	0	0	0	1	0	0	0	0	143039300000000	0	0	0	0	0	0	0	0	5	0	0	0	0	0	2	0	0	0	0	0	0	0	0	0	0	0	0	0	0	0	0	0	0	0
K00145	37948710000000	146332400000000	190753600000000	131164700000000	7296510000000	179773600000000	117191500000000	364087300000000	307521300000000	229763400000000	192714300000000	187754100000000	337179000000000	264160700000000	260640600000000	303080400000000	199302100000000	221209100000000	367848900000000	213221100000000	189838300000000	21279990000000	309299600000000	226630000000000	213547300000000	178502100000000	234753700000000	267470400000000	20178840000000	231900400000000	517611400000000	65023610000000	415199800000000	211933800000000	110631000000000	296291800000000	182132200000000	201985600000000	136292700000000	747755700000000	845884700000000	112776600000000	557033900000000	162640900000000	291418100000000	779345700000000	202786600000000	257370900000000	466380500000000
K00146	0	0	0	0	0	0	1	0	0	0	0	0	1	1	0	0	1	1	0	0	0	0	0	0	0	0	0	0	0	0	153192700000000	456566900000000	301464800000000	0	5	957529000000000	222897100000000	398105800000000	179538600000000	294198100000000	235943700000000	454157800000000	11578070000000	0	2	45	7	464362900000000	187443000000000
K00147	495453200000000	174920000000000	222923100000000	146290600000000	807320000000000	217480100000000	145030700000000	487114200000000	415161500000000	295586200000000	241539000000000	236134800000000	388366800000000	313846200000000	333524200000000	34006230000000	2528794000000	278912400000000	515309500000000	278333800000000	240874600000000	272991300000000	388454100000000	281848100000000	27067510000000	218478100000000	292505600000000	337886900000000	254193000000000	300238400000000	735955200000000	87832490000000	565484700000000	288583700000000	175186000000000	272949200000000	200032400000000	226584700000000	160206300000000	703683400000000	881944500000000	12273430000000	723329500000000	171063500000000	425096000000000	932578100000000	263233600000000	365664500000000	590426800000000
K00148	3	0	0	0	0	0	0	1	7	0	0	0	0	0	0	0	0	0	1	3	2	0	0	0	1	0	0	0	0	0	202316000000000	389678200000000	128796400000000	0	0	0	131543800000000	126926600000000	0	0	0	0	0	1	0	0	0	0	194804000000000
K00150	106778700000000	470632800000000	478889100000000	609055800000000	246688100000000	334689300000000	105892900000000	128772500000000	794147400000000	103312300000000	789792400000000	563885300000000	87586420000000	997973000000000	743931300000000	843628700000000	131611400000000	965046800000000	129509500000000	780715600000000	631252200000000	10092760000000	154702100000000	101639800000000	68612660000000	326749600000000	593757600000000	10973570000000	679466300000000	882249100000000	147110700000000	184792000000000	187340700000000	328188600000000	737480100000000	229271500000000	798125	4	15	85	10	116409400000000	10	3	155	396345600000000	119640200000000	208030900000000	145
K00151	2	113880100000000	0	0	0	0	112349100000000	2	321328200000000	2	4	0	0	0	0	5	0	1	51370480000000	2	509935900000000	2	1	1	119909500000000	136690000000000	109044200000000	0	303393200000000	1	11267300000000	325400600000000	269921200000000	46369710000000	0	910727500000000	736781400000000	159293500000000	790264800000000	194019600000000	124793000000000	246185400000000	3	0	2	1	5	0	248701800000000
K00153	745119700000000	125	28477370000000	390839900000000	538100100000000	168971500000000	263608100000000	752815100000000	611444300000000	314399900000000	194524400000000	1116939000000	508880800000000	422926000000000	45376280000000	316519000000000	422285100000000	174662900000000	913336900000000	386604700000000	350651700000000	296289100000000	561949800000000	277413300000000	229453700000000	283988300000000	431153100000000	343702300000000	215936500000000	366634000000000	675318600000000	244141500000000	780357000000000	25	133333300000000	1	1	1	1	0	1	0	803356200000000	4	5	761930400000000	538859600000000	3	102109500000000
K00154	0	0	0	0	0	0	0	0	0	0	0	0	0	0	0	0	0	0	0	0	0	0	0	0	0	0	0	0	0	0	109414600000000	270152000000000	460526300000000	0	0	0	330249100000000	10	0	0	0	0	0	0	0	0	0	0	9
K00156	586199000000000	20	167083800000000	155	15	372272200000000	14320490000000	679959800000000	770290700000000	262177400000000	121984400000000	261511900000000	160296600000000	155	266453500000000	137364300000000	402131800000000	201812400000000	60260840000000	38	498276600000000	1931252000000	295775800000000	216334700000000	527071600000000	351179000000000	503333300000000	953367200000000	197256700000000	233411700000000	317893900000000	144899000000000	126458500000000	731756500000000	63	927151900000000	70786410000000	862284100000000	406846100000000	304605200000000	331351200000000	619325300000000	158499000000000	442931700000000	111349000000000	130538100000000	242983100000000	58232960000000	172471400000000
K00158	895681100000000	20	187083800000000	305104400000000	15	30	14419900000000	116710400000000	133057000000000	291294200000000	105	243333300000000	184692700000000	266125600000000	639354600000000	154119400000000	127421400000000	1772764000000	976243900000000	644645100000000	834880200000000	205	175	184400700000000	913096600000000	575740000000000	703333300000000	105336700000000	145	184979300000000	318393900000000	146899000000000	126458500000000	726756500000000	62	927151900000000	704530800000000	862284100000000	406846100000000	304605200000000	331351200000000	619325300000000	158499000000000	442931700000000	111349000000000	130038100000000	230983100000000	58232960000000	172471400000000
K00161	111817600000000	132812500000000	535042600000000	356701300000000	180626800000000	494474100000000	233268600000000	112613600000000	137976100000000	825991700000000	605239400000000	720655200000000	11570790000000	915795300000000	962069400000000	770724300000000	120230400000000	670225700000000	125465700000000	744583100000000	578379100000000	691958900000000	825922800000000	766939900000000	605130500000000	646516800000000	681400700000000	814973000000000	541157500000000	843186600000000	18590950000000	10183880000000	570091700000000	134515100000000	132105800000000	19928810000000	145419900000000	228333300000000	25	113278900000000	120038300000000	133373200000000	302997200000000	102522700000000	183184200000000	378291500000000	148333300000000	116666700000000	696602900000000
K00162	115317100000000	953607300000000	61258520000000	432225800000000	119373200000000	308167100000000	141724900000000	122408000000000	106235800000000	516200200000000	399760600000000	371843600000000	740439800000000	760350000000000	765914800000000	433086700000000	100391400000000	429370900000000	104238400000000	656939900000000	346222200000000	456710800000000	557664400000000	417729300000000	454916400000000	411223200000000	543550400000000	591570300000000	393842500000000	516509100000000	191037200000000	108170700000000	242370700000000	195979000000000	125300800000000	331807900000000	17266830000000	204821800000000	95	131847200000000	167505800000000	646674200000000	382548700000000	85	161167400000000	314088100000000	12	24650080000000	429729500000000
K00163	7	401112400000000	3	16	0	2	1	18	3	1	3	1	308326700000000	11	22	45	5	3	9	3	4	0	4	3	6	1	5	1	2	0	170227700000000	529726400000000	23173370000000	0	0	0	181045800000000	134604300000000	2	0	0	0	12	0	6	1	0	0	24013620000000
K00164	686336500000000	75	441766500000000	9	7	11	277975900000000	605308000000000	564277000000000	142624600000000	33	136880900000000	435323700000000	575467200000000	162098300000000	28	270458600000000	186150200000000	885108000000000	435202600000000	268463800000000	241924600000000	445230800000000	26	220654800000000	236123900000000	423546100000000	28	15	19	415246300000000	279815100000000	168134100000000	320202000000000	206097700000000	255702800000000	279228600000000	223215600000000	273791200000000	293001600000000	232533800000000	268288400000000	310779800000000	104593300000000	191295800000000	231264700000000	299581700000000	15780390000000	204481400000000
K00166	846306800000000	196306800000000	4	0	0	326055300000000	0	75	9	2	3	275590600000000	1	1	3	0	5	1	3	5	55	217647100000000	3	2	3	2	25	346306800000000	5	2	576248200000000	548125900000000	22903740000000	3	3	560116900000000	506484600000000	5	25	0	0	0	436506200000000	5	546341500000000	96	5	2	346306800000000
K00167	253693200000000	303693200000000	387067000000000	0	0	29616230000000	0	15	1	1	1	0	133333300000000	0	5	2	1	0	4	1	5	4	45	0	15	0	15	284063600000000	1	1	153200500000000	66574030000000	112766200000000	362355700000000	263565900000000	626199900000000	845801100000000	104382100000000	5	0	0	0	625849500000000	0	4	433181800000000	0	498341100000000	128529600000000
K00169	486340700000000	181635700000000	168405000000000	165520000000000	226599200000000	101310100000000	129827100000000	504232300000000	373124900000000	306863800000000	289519900000000	298052100000000	225668600000000	234618900000000	276437900000000	381106200000000	270148100000000	323335400000000	485157300000000	252715400000000	26172720000000	295442600000000	315975800000000	371004500000000	243376100000000	220238200000000	276954200000000	32650790000000	286242600000000	310781400000000	701501600000000	942000600000000	699123300000000	412879200000000	201666700000000	364200400000000	8	135	9	125	5	16	692339300000000	189166700000000	30193800000000	109103600000000	362534600000000	408994100000000	734148000000000
K00170	390480000000000	135962000000000	111655800000000	170608000000000	865625800000000	648885000000000	11009760000000	421011600000000	370756100000000	222125100000000	193026400000000	195488100000000	192491000000000	162495200000000	29440990000000	218565800000000	200175400000000	170822300000000	385452700000000	227639400000000	219618300000000	212924900000000	222947100000000	20647460000000	227776700000000	145769900000000	205275700000000	165501200000000	163297200000000	204402000000000	510452700000000	680224400000000	551263500000000	233342100000000	152673900000000	136334700000000	11	16	517663600000000	35	25	875416700000000	397375600000000	205	158836400000000	753441400000000	254566000000000	210306200000000	531630800000000
K00171	151173700000000	363750000000000	368953300000000	251678300000000	12	162706200000000	220875500000000	135869800000000	785192700000000	380189500000000	343834900000000	310492000000000	981313500000000	825364400000000	932484800000000	559757400000000	556973000000000	412101800000000	131481200000000	723349300000000	631352600000000	513067900000000	823371400000000	754016500000000	671231000000000	555810200000000	76930020000000	62074500000000	42868720000000	478162700000000	188115800000000	251008100000000	252704000000000	133333300000000	933333300000000	9	658447500000000	2	25	15	1	516666700000000	200104500000000	106666700000000	75	326947000000000	260768500000000	161245800000000	148333300000000
K00172	328172900000000	883991400000000	736817900000000	876004900000000	139160000000000	502068900000000	57925310000000	302093700000000	227417600000000	168483700000000	163894100000000	127408800000000	174873000000000	155544800000000	205804100000000	220303500000000	14593600000000	132333900000000	323777300000000	174799600000000	15281680000000	179715900000000	215814800000000	1777144000000	176415700000000	146724300000000	179546500000000	179545500000000	142975700000000	175679100000000	487614900000000	981139800000000	575147300000000	146881200000000	145899500000000	259268000000000	104178100000000	139540800000000	75	65	35	866666700000000	438228700000000	208333300000000	229292800000000	537449500000000	230345800000000	260449300000000	417049900000000
K00174	132731500000000	376476700000000	442933100000000	175975100000000	835914400000000	376461100000000	360566800000000	134718700000000	117594600000000	491419500000000	405849500000000	303948000000000	732004500000000	62315430000000	515896300000000	404374600000000	475367500000000	334737700000000	133160800000000	73171280000000	617845600000000	44116110000000	612742300000000	523732000000000	729688700000000	658865800000000	880400500000000	383165700000000	360271300000000	420241700000000	634645600000000	785556800000000	732026000000000	301177400000000	186143000000000	30802600000000	18341420000000	361529700000000	156676700000000	520397200000000	682677100000000	915080600000000	887600800000000	278160800000000	715361500000000	75475620000000	179553100000000	268015100000000	945025300000000
K00175	854902800000000	197833200000000	269910800000000	759230700000000	620347500000000	327189600000000	196945300000000	764110000000000	72644060000000	327947000000000	270582200000000	227081700000000	495618100000000	414035400000000	331484700000000	293009300000000	327466600000000	246325200000000	904175600000000	51977560000000	435555800000000	32977470000000	434747500000000	352483800000000	469479200000000	386295500000000	607181900000000	37274440000000	258354000000000	292609800000000	334590900000000	474032900000000	464851500000000	179633300000000	104960200000000	221367100000000	105824100000000	198622300000000	85304840000000	298254400000000	381575700000000	525339900000000	505953000000000	167972200000000	412829000000000	429997200000000	990148600000000	132835400000000	554266700000000
K00176	234713500000000	728447200000000	133175000000000	510409900000000	295772600000000	104959400000000	693887400000000	237555500000000	188729000000000	112192700000000	888598100000000	862117400000000	210502600000000	158281400000000	161735000000000	142058500000000	898832300000000	98807160000000	222931700000000	135503800000000	115526400000000	103503200000000	161814300000000	111549700000000	114252100000000	108976700000000	135279500000000	147452300000000	899941600000000	114211300000000	378823400000000	526295300000000	306164000000000	136835800000000	696281600000000	172084800000000	105069400000000	959973800000000	594933900000000	371098300000000	555620000000000	509915300000000	419681500000000	110734700000000	257832200000000	649377200000000	137853300000000	224126800000000	290052300000000
K00177	376752600000000	14976020000000	887958300000000	644286000000000	336592500000000	949000300000000	103778500000000	364274500000000	30672190000000	129670900000000	117477500000000	991403500000000	264376600000000	241249400000000	232041800000000	163413300000000	148119200000000	113518000000000	408868000000000	211560500000000	216753400000000	141097100000000	198541600000000	164840500000000	179034800000000	178408500000000	240613800000000	156702200000000	106775600000000	144757200000000	135714100000000	180704000000000	129209200000000	560571000000000	30024170000000	573505300000000	369150800000000	621438600000000	275857900000000	678685300000000	775045600000000	145652600000000	169415200000000	46575890000000	1210003000000	136639500000000	369086200000000	518689600000000	136980600000000
K00179	22484650000000	576207300000000	543723400000000	547496600000000	186924300000000	592463900000000	741374400000000	201469700000000	182517100000000	140805200000000	105178200000000	111527500000000	102152700000000	921594500000000	128064900000000	12244070000000	974608100000000	104878200000000	228571300000000	130210400000000	116136600000000	144058900000000	161712200000000	12000190000000	127834800000000	104152700000000	136316700000000	117196300000000	103762900000000	126529600000000	575206500000000	749874300000000	675304900000000	289866300000000	185148500000000	343165100000000	15493530000000	277146200000000	121094100000000	683207500000000	808281300000000	109247000000000	803005400000000	219538700000000	585176000000000	106373800000000	269999500000000	375268600000000	681928300000000
K00180	655554000000000	130111800000000	160305800000000	147967600000000	598917800000000	175210800000000	240781600000000	741230900000000	543965200000000	438020800000000	300668700000000	325924500000000	334043700000000	282951900000000	414969100000000	376703400000000	267435800000000	276937400000000	727358400000000	418828500000000	356907400000000	379884600000000	467809000000000	358418300000000	372521300000000	31334490000000	412516000000000	392372400000000	298738900000000	372239200000000	17065790000000	18739130000000	157419900000000	654631800000000	376377500000000	107497700000000	525817900000000	675684400000000	31710000000000	309858100000000	241615300000000	264608300000000	223626500000000	560997500000000	171201300000000	262532200000000	644256300000000	896131500000000	191856100000000
K00183	786230100000000	14892290000000	81424840000000	591319800000000	163929100000000	200531800000000	264095500000000	804243100000000	697661300000000	339379600000000	275937200000000	208928400000000	923373400000000	852203100000000	594321700000000	325973700000000	281200800000000	240931800000000	102697400000000	596943400000000	457389400000000	284372100000000	499197000000000	354374500000000	403604900000000	292969600000000	527121400000000	479980700000000	284643800000000	299311600000000	198653500000000	249533000000000	250075400000000	381500200000000	137148300000000	492213900000000	553333300000000	579431800000000	340360900000000	8	10	12	21983360000000	601771400000000	846512500000000	121659900000000	602941200000000	596805100000000	132425600000000
K00184	469452100000000	951020800000000	306554600000000	28905850000000	568006000000000	689331900000000	213552900000000	464469900000000	306449200000000	226410000000000	150876800000000	151879900000000	530260600000000	423108900000000	282951000000000	24587070000000	329169000000000	18321450000000	637909900000000	304527000000000	290270900000000	220160600000000	329746800000000	240405400000000	206187300000000	185607900000000	278904000000000	282955400000000	195771500000000	158689400000000	903823200000000	123688800000000	102386500000000	504775600000000	385148800000000	55629120000000	410010900000000	322260200000000	280886300000000	387693400000000	317537700000000	310694100000000	837639100000000	284716000000000	577399600000000	744701800000000	323690000000000	634337400000000	802330100000000
K00185	470885100000000	103482100000000	363466400000000	31637990000000	862883400000000	119468000000000	264429400000000	483113000000000	424815400000000	251005900000000	151807900000000	138310700000000	536278600000000	517674700000000	304372100000000	301332700000000	266600600000000	20519060000000	647064900000000	353825600000000	25517320000000	231317900000000	392327000000000	266446500000000	262239900000000	183857600000000	319155700000000	318431800000000	20664660000000	220001600000000	119096300000000	116959600000000	110671800000000	367270600000000	352752200000000	474285500000000	439323700000000	405	309306300000000	286184400000000	194872000000000	213958700000000	137477500000000	291666700000000	652082600000000	810038700000000	533333300000000	391697400000000	109020000000000
K00186	749731700000000	225627000000000	330490400000000	134424900000000	665488000000000	198932500000000	262179200000000	774232700000000	683605800000000	344240800000000	261172700000000	20898170000000	515208800000000	409468400000000	375267300000000	281366200000000	351074400000000	238974400000000	802763300000000	409638900000000	376181900000000	283191900000000	440986700000000	325303900000000	435523900000000	372388500000000	509319000000000	26183690000000	229889900000000	26600040000000	309639800000000	368798900000000	315474400000000	115593000000000	782130100000000	133577600000000	69139550000000	137568200000000	623333300000000	2875	301817200000000	374102200000000	367364600000000	104975800000000	302331600000000	272677300000000	729392700000000	114281500000000	392375500000000
K00187	525409100000000	189298500000000	117300900000000	713699000000000	378259100000000	168618800000000	127616700000000	479006600000000	441250400000000	156844000000000	151747800000000	132737700000000	246039400000000	204183200000000	226289200000000	164551300000000	148488100000000	123721200000000	514648100000000	297097700000000	258985400000000	170120100000000	247421900000000	20805820000000	27432270000000	242001000000000	313136700000000	184894800000000	128667700000000	186265100000000	215018700000000	284306900000000	277020400000000	929022300000000	740350600000000	13581760000000	664337000000000	131264800000000	396511700000000	137868500000000	164458200000000	338881300000000	345084800000000	107489300000000	282695800000000	267244300000000	604536700000000	870238800000000	351339400000000
K00188	0	0	0	0	15	0	281359600000000	0	0	5	0	15	0	0	0	0	0	0	0	0	0	1	0	5	0	0	0	833333300000000	0	0	0	0	333333300000000	0	0	0	0	0	0	0	0	0	0	0	0	333333300000000	0	0	0
K00189	0	5	0	0	0	0	0	0	0	1	1	1	1	0	0	0	507303400000000	0	1	0	0	0	0	1	120542800000000	1	0	5	1	0	0	0	0	0	0	0	0	0	0	0	0	0	0	0	0	0	0	0	0
K00193	151480100000000	717627300000000	118539800000000	14213410000000	563037200000000	383460100000000	559734600000000	132173800000000	131440000000000	987987800000000	757894600000000	850968200000000	539090700000000	581216700000000	125519000000000	113061000000000	836008300000000	820189800000000	139809900000000	846240800000000	913883300000000	104244500000000	874964700000000	951400500000000	940951400000000	735564900000000	790551300000000	924325300000000	810431800000000	915851000000000	110455900000000	179363100000000	10348940000000	236280600000000	22	392247000000000	7	18	3	1	8	11	121586200000000	248333300000000	625384000000000	992547300000000	401941000000000	383524700000000	948311900000000
K00194	420704700000000	234157700000000	30276920000000	443447400000000	177353900000000	875683500000000	156197900000000	387559600000000	428630000000000	260963700000000	221173400000000	329610000000000	204042900000000	165690000000000	388222200000000	277236700000000	313429800000000	238528600000000	443383600000000	276542700000000	265908200000000	332048900000000	328299900000000	254020600000000	302150400000000	217928300000000	232971300000000	258143700000000	267542600000000	282681300000000	263819400000000	27253720000000	15426490000000	124840300000000	2	147206800000000	15	2	25	5	5	2	287719200000000	9	156455800000000	383627000000000	733333300000000	252318600000000	245584000000000
K00196	122340400000000	604815700000000	346753900000000	382736700000000	887770300000000	123934700000000	695576800000000	832831600000000	864050800000000	834400300000000	102105100000000	77572360000000	126123300000000	689293800000000	111360200000000	719057300000000	986825600000000	779514500000000	131495900000000	771804600000000	670391100000000	102842200000000	122895100000000	129644800000000	800031500000000	448264100000000	992082600000000	914251600000000	934615000000000	118894800000000	215103900000000	429124700000000	851975300000000	277948200000000	25	95	3	333333300000000	5	183333300000000	333333300000000	2	197500800000000	35	101755200000000	302051900000000	147352600000000	113946300000000	928648600000000
K00197	114868200000000	485747400000000	75356090000000	920833400000000	342225800000000	257179100000000	364467700000000	106311500000000	105553500000000	694691600000000	516837100000000	591790500000000	444486600000000	423527600000000	944985900000000	732570900000000	568282500000000	557159900000000	116927500000000	665022600000000	663495800000000	724050400000000	666050600000000	62525400000000	769361700000000	556230800000000	637594100000000	644977800000000	660843100000000	729925900000000	572636300000000	111141300000000	479534200000000	200159700000000	150579800000000	218024900000000	5	155	516666700000000	85	85	7	725520100000000	175	357173500000000	876555000000000	22	416216900000000	492791000000000
K00198	193725800000000	717852700000000	124017700000000	15847190000000	577832000000000	391958900000000	542983000000000	17441830000000	17945700000000	113195800000000	854747300000000	103334100000000	763791300000000	723966500000000	156681600000000	12042310000000	11493150000000	100889300000000	192405300000000	114734900000000	120714700000000	122998400000000	124007700000000	111092000000000	139404600000000	862755600000000	108425800000000	104103500000000	100189000000000	108220700000000	152264500000000	183408600000000	102254600000000	419840300000000	236666700000000	433235100000000	15	165	55	115	32	30	128980000000000	414898900000000	674405100000000	417991600000000	705794700000000	151471000000000	115833700000000
K00200	822982900000000	372003000000000	0	0	12	0	7	10	133678900000000	155024100000000	134402200000000	143200800000000	18	432576300000000	13688010000000	14	22125550000000	242980800000000	12	7	1975374000000	15	141839000000000	528856700000000	11	2	6	135034800000000	118758200000000	186744100000000	0	1	2	0	2	5	1	0	0	0	0	0	0	0	0	3	0	1	2
K00201	110034700000000	444563100000000	0	0	445422100000000	0	724938700000000	10806250000000	798999500000000	771401900000000	858629800000000	119202300000000	13	767423700000000	20311990000000	242165000000000	128372600000000	127019200000000	173677700000000	12	736972800000000	12	132249900000000	771401900000000	86656980000000	4	415291800000000	7	740483000000000	879698400000000	15	2	1	0	0	1	0	0	0	0	0	0	0	0	0	0	0	1	0
K00202	909059800000000	256517700000000	0	0	145457800000000	0	775061300000000	419375300000000	10	728598100000000	109734900000000	705693100000000	3	6	6	147835000000000	193377100000000	8	51215360000000	3	387653300000000	1	11591110000000	699741400000000	899139400000000	2	884708200000000	349651600000000	1	7	35	0	1	1	0	5	0	0	0	0	0	0	0	0	0	1	0	1	3
K00203	309059800000000	156517700000000	0	0	354577900000000	0	175061300000000	119375300000000	0	328598100000000	697348600000000	405693100000000	0	0	0	178349900000000	118745100000000	0	31215360000000	1	287653300000000	0	177501100000000	128598100000000	399139400000000	0	384708200000000	0	0	3	15	0	0	0	0	5	0	0	0	0	0	0	0	0	0	0	0	0	0
K00204	0	7199345000000	0	0	0	0	0	5	1	0	3	5	2	0	3	3	4	247138000000000	0	1	2	253823500000000	0	2	0	0	2	1	0	0	0	0	0	0	0	0	0	0	0	0	0	0	0	0	0	0	5	0	0
K00205	176344400000000	414443700000000	0	390769500000000	226298200000000	25	95	233012600000000	304329300000000	29058350000000	207174700000000	301533100000000	443386600000000	399219900000000	334067300000000	185940400000000	302940000000000	276933600000000	246250900000000	14030730000000	265227700000000	184192500000000	231518300000000	147548200000000	167936700000000	605882000000000	145958900000000	123740200000000	202740800000000	222895200000000	259444400000000	109943600000000	16088	4	0	1	104291200000000	704881100000000	355899400000000	0	0	0	106148000000000	65	793371900000000	3	5	0	156502500000000
K00207	202067700000000	136535900000000	377649900000000	680762900000000	512842800000000	538329500000000	348945000000000	201248500000000	143909700000000	595374500000000	482137400000000	544202100000000	229386500000000	185076300000000	125235600000000	764094500000000	444218900000000	597488600000000	230748200000000	103336400000000	776614400000000	592071000000000	115455700000000	777867600000000	744211800000000	669996400000000	105997900000000	712494300000000	513543200000000	682072300000000	164044600000000	11	166943300000000	1	3	341596600000000	10	55	4	3	1	0	138465000000000	11	15	12	5	716329500000000	10
K00208	278969600000000	991750900000000	414584200000000	5	65	895861100000000	33679600000000	240504900000000	2166276000000	391270700000000	358613600000000	267810700000000	531944800000000	800883900000000	506422200000000	155	206401400000000	185	26410270000000	150363100000000	1346091000000	38	351884900000000	461373000000000	134131200000000	166689400000000	155335400000000	26103780000000	242990900000000	422352000000000	165486000000000	166247900000000	176494000000000	885573600000000	587291600000000	773091700000000	42550550000000	872032500000000	315726100000000	221811100000000	290235200000000	26178920000000	209597600000000	783416400000000	195615100000000	234007900000000	672243800000000	921107800000000	254889900000000
K00209	368720100000000	769271800000000	128773000000000	225988400000000	133794200000000	194162000000000	491300100000000	303925700000000	364575700000000	154537900000000	154056100000000	185209700000000	122540400000000	998887000000000	2369108000000	186675300000000	148449600000000	134660800000000	314220400000000	2131257000000	233206000000000	188435500000000	156551800000000	137177500000000	224948500000000	189974300000000	197313000000000	140638000000000	142762600000000	149573600000000	55369010000000	419173700000000	265331300000000	2	2	2	437264200000000	3	25	0	0	1	287672600000000	3	387909000000000	135593400000000	2	333333300000000	16
K00210	505887000000000	186384100000000	239965900000000	198874600000000	903735800000000	167199400000000	15769310000000	511255700000000	423365000000000	29144900000000	238075000000000	244134200000000	346828500000000	3251715000000	369380000000000	354117500000000	236495000000000	280782400000000	520640600000000	291682200000000	244613600000000	27224550000000	37692600000000	257909300000000	282521600000000	236767900000000	313956600000000	340307400000000	253945200000000	295842700000000	695392200000000	809710600000000	465748000000000	265432100000000	152433900000000	300067300000000	1551020000000	18860660000000	105562100000000	866879300000000	833819600000000	106331700000000	520667400000000	17831930000000	262216800000000	8305212000000	291954600000000	29651150000000	536100300000000
K00211	993157400000000	254455200000000	184020000000000	103422300000000	45	473534700000000	357492600000000	110676300000000	116653600000000	273365100000000	25	204928400000000	65	0	458333300000000	35	16994330000000	189213700000000	866765200000000	742775900000000	517940200000000	379249900000000	432708200000000	330538400000000	568067800000000	545290500000000	59622300000000	246248600000000	218097500000000	225331700000000	102294900000000	917363300000000	115417500000000	666993200000000	408825800000000	821043600000000	331497100000000	565837800000000	24007180000000	237523000000000	339450900000000	349399800000000	117682200000000	5298992000000	11280310000000	167518900000000	587360500000000	447747100000000	16344150000000
K00214	241125300000000	485603200000000	616949400000000	128148700000000	15001470000000	138525700000000	325173500000000	203339700000000	187354200000000	57053540000000	802608000000000	69006690000000	176552400000000	121459100000000	143935900000000	794421100000000	598344100000000	730296500000000	278665900000000	133177300000000	12402960000000	577739000000000	59762400000000	589492600000000	13291920000000	962684800000000	127793900000000	464024500000000	678604200000000	796792800000000	138764800000000	191790800000000	118854900000000	3	3	2	0	2	1	0	0	0	192260700000000	4	7	112590300000000	8	6	217568600000000
K00215	33964620000000	122990000000000	17155090000000	109757000000000	505123700000000	123344300000000	884349700000000	340837000000000	277858600000000	18174170000000	142397300000000	146337300000000	250278500000000	220680300000000	229124400000000	212425900000000	154670700000000	169397500000000	340014100000000	195426100000000	17781100000000	16804850000000	225221700000000	163813500000000	194401300000000	15458080000000	201926300000000	218896200000000	161018300000000	198543700000000	423868200000000	557332300000000	302571000000000	18544780000000	718865800000000	173408800000000	945365100000000	12598780000000	953920400000000	478639400000000	420805100000000	576916000000000	392989400000000	103246900000000	215916700000000	545592200000000	146906300000000	209128600000000	388532900000000
K00217	203909400000000	839624400000000	165681700000000	320145000000000	329700200000000	627178800000000	145092100000000	18764410000000	183689500000000	142966700000000	105813800000000	110718900000000	692921100000000	623952100000000	124086400000000	148577200000000	545154500000000	995203200000000	192844700000000	105979200000000	101001600000000	127659900000000	152340600000000	116642200000000	134849500000000	996411100000000	102585700000000	150879200000000	115728700000000	143047300000000	922602300000000	15537520000000	736175900000000	253366400000000	102653900000000	497853000000000	1	95	133333300000000	25	4	14	361854300000000	95	26	227462900000000	44381720000000	81995670000000	814105100000000
K00219	807237300000000	237208800000000	332031800000000	267544200000000	101100600000000	119494700000000	169224300000000	743881400000000	571431300000000	294916800000000	182402200000000	167803300000000	753439900000000	669410200000000	486838900000000	263969100000000	22862930000000	215238100000000	949642900000000	476637600000000	318936800000000	197766700000000	434318900000000	259729000000000	388805600000000	300870200000000	552060200000000	328524200000000	215512700000000	225192000000000	715859300000000	289027700000000	189516500000000	344100400000000	135	553076300000000	810220500000000	104695600000000	424747000000000	445048400000000	372454500000000	654010800000000	121112300000000	396287300000000	490078000000000	827283700000000	396786500000000	647571000000000	131051000000000
K00220	505887000000000	186384100000000	239965900000000	198874600000000	903735800000000	167199400000000	15769310000000	511255700000000	423365000000000	29144900000000	238075000000000	244134200000000	346828500000000	3251715000000	369380000000000	354117500000000	236495000000000	280782400000000	520640600000000	291682200000000	244613600000000	27224550000000	37692600000000	257909300000000	282521600000000	236767900000000	313956600000000	340307400000000	253945200000000	295842700000000	695392200000000	809710600000000	465748000000000	265432100000000	152433900000000	300067300000000	1551020000000	18860660000000	105562100000000	866879300000000	833819600000000	106331700000000	520667400000000	17831930000000	262216800000000	8305212000000	291954600000000	29651150000000	536100300000000
K00223	608552800000000	180273300000000	4	2	185883900000000	498193400000000	212466600000000	493785700000000	560693500000000	179678900000000	16373300000000	135627300000000	33770250000000	11	271976300000000	234185100000000	109724100000000	162351200000000	723501800000000	387503500000000	32257540000000	157906000000000	213176600000000	140290800000000	317636500000000	291390200000000	29	173312600000000	177178500000000	182170600000000	16	13	12	295081700000000	280044400000000	286276200000000	0	3	0	4	3	6	105990300000000	5	65	611760500000000	230407500000000	316297200000000	12
K00226	567720400000000	198946000000000	284808900000000	186819600000000	9254604000000	294705000000000	182618800000000	551636400000000	476450800000000	368381000000000	298064900000000	276229200000000	580761700000000	440478000000000	406478600000000	507852800000000	343267200000000	356169300000000	568116900000000	305772600000000	259652400000000	310464100000000	50273560000000	345331200000000	294576800000000	25161200000000	344948900000000	437017900000000	315536600000000	35553530000000	809814200000000	9516706000000	601220300000000	295440400000000	194111000000000	339193000000000	33348600000000	307146500000000	185572500000000	946197200000000	937659200000000	143626700000000	945379700000000	241653100000000	509474100000000	110644000000000	310385300000000	466976600000000	75976390000000
K00228	0	0	0	0	0	0	0	0	0	0	0	0	0	1	0	0	0	0	0	0	0	0	0	0	0	0	0	0	0	0	517969300000000	202505500000000	933492600000000	0	5	0	102083500000000	177597600000000	646521100000000	209352400000000	776491700000000	174234300000000	354407300000000	0	1	0	0	0	673567200000000
K00230	377918800000000	127145900000000	176654000000000	103969100000000	5	567101300000000	160783800000000	499458600000000	318224100000000	324556000000000	20376140000000	211640600000000	37478860000000	41982500000000	256465400000000	30781300000000	135998700000000	191090900000000	3757917000000	282775200000000	20245010000000	213837700000000	307565100000000	229720100000000	222450000000000	233850100000000	233509100000000	181438800000000	264640500000000	233927900000000	22403450000000	18	109236200000000	569284300000000	556028900000000	641349900000000	646331700000000	10	632863800000000	682129700000000	3	14382470000000	202349900000000	758906900000000	6	247094100000000	115181000000000	152365500000000	283653300000000
K00231	5494601000000	17697250000000	267762400000000	187860800000000	2	456369900000000	254234800000000	61467790000000	448109500000000	406255500000000	374083800000000	287191900000000	683907000000000	344980700000000	727674900000000	243483300000000	234750000000000	25069770000000	708343000000000	345680500000000	250129600000000	447986500000000	360763200000000	407820600000000	216454900000000	260279200000000	31	290912000000000	254745000000000	297438500000000	750893300000000	213050000000000	18323470000000	601585000000000	47634000000000	817520500000000	726106800000000	294137200000000	475441400000000	6	3	105	271706700000000	152245700000000	28677970000000	315933000000000	2	112150500000000	219956600000000
K00232	0	0	0	0	0	0	0	0	0	0	1	0	0	0	0	0	5	0	0	0	0	0	0	0	0	0	0	0	0	0	0	0	1	169092700000000	106384700000000	126544600000000	0	1	0	115072700000000	157872400000000	226829000000000	0	0	0	788994200000000	15967920000000	408670700000000	0
K00239	396860700000000	145820700000000	2499268000000	173715200000000	654639600000000	150723400000000	105562600000000	373517300000000	31566090000000	226403400000000	176310100000000	153871700000000	28708340000000	253020900000000	287433000000000	249629500000000	13786270000000	187079900000000	378601100000000	217107700000000	17116390000000	190129100000000	261517600000000	207017300000000	227143000000000	181001200000000	227406600000000	246405500000000	180174300000000	207243500000000	63943220000000	800829900000000	719506000000000	277346300000000	172707800000000	342364300000000	261834100000000	371023300000000	200148900000000	110513900000000	115681500000000	153916200000000	772621700000000	20257870000000	566614000000000	935771200000000	23993970000000	370203800000000	728148700000000
K00240	119948900000000	402248100000000	786657300000000	378922800000000	136756600000000	605046400000000	33575130000000	108879900000000	938097000000000	696918700000000	565767000000000	607060500000000	11906110000000	827276200000000	897479500000000	981601200000000	541455100000000	620635000000000	115900000000000	650876600000000	54284650000000	611398700000000	924916800000000	642239200000000	618318200000000	517881300000000	662661400000000	787580000000000	676818100000000	772735700000000	275637400000000	269253700000000	167676500000000	667271200000000	443592300000000	880152900000000	869315400000000	102743200000000	613397200000000	364802000000000	587453200000000	666468400000000	21023280000000	696314600000000	134175000000000	243478800000000	441982900000000	814888100000000	198804300000000
K00241	172976000000000	778592500000000	335864000000000	264839300000000	8	36566920000000	404422900000000	158998600000000	146288500000000	546904400000000	328543100000000	306120400000000	544419600000000	496663600000000	646810400000000	148417300000000	153448600000000	151717100000000	163881600000000	100534800000000	100354800000000	392186600000000	557039000000000	393369900000000	124085200000000	8707444000000	118825300000000	269628200000000	310938900000000	299532600000000	910712100000000	753652900000000	807896800000000	212458600000000	21739330000000	407677900000000	32	506278300000000	161506000000000	103584600000000	635659800000000	120893900000000	105941000000000	211006400000000	980861500000000	664883000000000	189493200000000	202947500000000	103238400000000
K00242	0	0	0	0	2	0	0	0	0	2	143558300000000	0	0	0	0	0	0	0	0	0	0	0	0	5	0	0	0	5	0	0	873229900000000	843239800000000	15	0	0	5	2	437893400000000	0	2424318000000	5	0	0	0	0	0	5	0	655025800000000
K00243	163646900000000	463793800000000	587677600000000	635161200000000	261721200000000	214450300000000	247652100000000	14445530000000	144091200000000	596847900000000	495299700000000	55902410000000	426985600000000	468116700000000	91295400000000	597533700000000	377438000000000	441236200000000	179614700000000	949545500000000	917341700000000	658380800000000	714664400000000	58012020000000	10350840000000	710699200000000	863273300000000	594964700000000	583552300000000	637213700000000	229125600000000	2460262000000	138408200000000	815062200000000	367957600000000	755234700000000	517143600000000	971412400000000	243903200000000	151108800000000	125	176670000000000	225362100000000	784724300000000	144636000000000	342358000000000	672515100000000	122295700000000	199362600000000
K00244	107477400000000	372750900000000	426431300000000	315710800000000	142641400000000	240559600000000	256003900000000	102369200000000	904574300000000	471748200000000	380993100000000	362960400000000	73860860000000	611541400000000	602216900000000	514673400000000	393817800000000	395684200000000	114519500000000	609833300000000	506721100000000	461744800000000	620341900000000	466875900000000	553122600000000	469039900000000	671605500000000	519202200000000	39238570000000	467909800000000	16428290000000	230501200000000	181132400000000	206883600000000	122796200000000	182249700000000	453327500000000	556231900000000	333474200000000	117604300000000	110973900000000	142492400000000	200045800000000	612866200000000	100003400000000	34344860000000	203071200000000	180691900000000	185038700000000
K00245	726490200000000	1760255000000	350362800000000	242416500000000	773801700000000	154869300000000	158335800000000	682160400000000	590327900000000	310853500000000	240723000000000	313119100000000	268815800000000	230177900000000	461632500000000	312558100000000	134487300000000	232544500000000	819193600000000	45340240000000	396508200000000	343325500000000	382976400000000	321553700000000	416602400000000	345513500000000	398382900000000	296433700000000	309089300000000	342100400000000	153915900000000	208006800000000	164774300000000	554906900000000	444690700000000	720134400000000	416964600000000	806007000000000	428403100000000	207706100000000	38466560000000	481785600000000	174681900000000	542020900000000	125542400000000	184593800000000	351050400000000	691023900000000	188209300000000
K00246	18586630000000	0	0	0	0	1	0	13506150000000	284467900000000	45	0	5	95	8	55	0	5	0	193702800000000	555006300000000	127626700000000	2	1	45	744246000000000	475022200000000	124314100000000	1	166666700000000	1	194463800000000	105	201887400000000	289499000000000	0	65	1	416666700000000	1	35	1	127354400000000	151253800000000	75	6	117703300000000	735728800000000	432363900000000	143654900000000
K00247	32840310000000	512742400000000	0	181708000000000	25	0	6	213948100000000	177884100000000	831002600000000	35	451502900000000	678849600000000	120830400000000	959094900000000	3	1	3	238523300000000	136894000000000	137464500000000	765473100000000	95	4	15117460000000	894	209946700000000	4	6	6	8	615193400000000	85	0	0	0	317491700000000	5	497400800000000	5	967628100000000	0	25	0	0	0	5	5	522209600000000
K00248	441790800000000	123663400000000	113044900000000	105977900000000	385150600000000	995444500000000	107219300000000	402996700000000	357310800000000	170793600000000	139324200000000	122853200000000	214064400000000	17283880000000	207964600000000	161143000000000	111531500000000	134084300000000	412691800000000	236503900000000	217956800000000	174218400000000	214728600000000	174001300000000	212744700000000	180035900000000	264926900000000	173181900000000	123344200000000	166134400000000	164757800000000	131012100000000	914554200000000	377398500000000	196110000000000	413767100000000	2327211000000	358701700000000	997477200000000	624203500000000	963450600000000	117727300000000	846055500000000	268604900000000	589414800000000	138817300000000	345524700000000	474482200000000	986720800000000
K00249	616518400000000	143309500000000	104747600000000	176996500000000	165	215195500000000	948015900000000	559903600000000	556102400000000	926518900000000	100772500000000	559284000000000	118579500000000	119798400000000	681987000000000	335112900000000	19	11	473350700000000	320832600000000	246431100000000	843776500000000	132403200000000	121016600000000	228577900000000	270964700000000	377519200000000	857971300000000	558333300000000	119261000000000	255021600000000	149445600000000	108095400000000	115182200000000	751081600000000	984943800000000	107824800000000	102058900000000	846176500000000	971894900000000	920312700000000	965711300000000	12987660000000	449354700000000	984837000000000	154211500000000	124167600000000	906909300000000	131313000000000
K00252	0	0	0	0	0	0	0	0	0	0	0	0	0	0	0	0	0	0	0	0	0	0	0	0	0	0	0	0	0	0	601236200000000	19	4	0	0	0	3	710819400000000	0	0	0	0	0	0	0	0	0	0	8
K00253	0	0	0	0	3	0	0	0	0	5	5	0	0	0	0	435038400000000	1	0	0	0	0	3	2	0	0	0	0	2	2	129530200000000	475258000000000	81354850000000	700068000000000	15	14093020000000	3	627066500000000	589804000000000	0	0	0	125731000000000	0	0	0	147428600000000	136191500000000	213516400000000	4
K00254	682061100000000	362959400000000	52411400000000	217216300000000	114636800000000	610361900000000	334701700000000	758647400000000	484761700000000	513801700000000	439234600000000	382116000000000	118039800000000	787244500000000	678533800000000	915867000000000	50551850000000	538065700000000	706027000000000	35774140000000	274214200000000	389943200000000	773355300000000	471021800000000	358564100000000	31961350000000	417370900000000	70094440000000	47364510000000	538031000000000	174564600000000	182605200000000	133037100000000	633267400000000	43066110000000	599041800000000	838736900000000	630448300000000	320743800000000	174939000000000	31	294378600000000	14660310000000	505227500000000	772664500000000	151698000000000	667457200000000	860508700000000	14715210000000
K00255	0	0	0	0	3	0	0	0	0	5	5	0	0	0	0	435038400000000	1	0	0	0	0	3	2	0	0	0	0	2	2	129530200000000	0	0	0	15	14093020000000	3	0	0	0	0	0	125731000000000	0	0	0	147428600000000	136191500000000	213516400000000	0
K00259	430639000000000	145040000000000	143997700000000	387100600000000	18	1421216000000	3678905000000	484503400000000	416395800000000	883072600000000	855223500000000	98635850000000	837928500000000	874538300000000	151168900000000	616001200000000	246863300000000	583563000000000	360056500000000	238543500000000	198674100000000	829642200000000	106950600000000	68712180000000	248020600000000	196667500000000	293196900000000	901466700000000	764785600000000	101108100000000	227533600000000	263340900000000	20830760000000	106075700000000	467958900000000	876105400000000	850489000000000	110747700000000	555508700000000	122149200000000	163813900000000	32153410000000	295395300000000	964229100000000	252381400000000	232999500000000	421150300000000	607917800000000	292021500000000
K00260	126136300000000	264258300000000	3	254639200000000	0	28	5	112756400000000	138806700000000	834818100000000	865	765505800000000	865883700000000	95376790000000	686928700000000	62	161287400000000	828888400000000	125852900000000	461526300000000	369788200000000	136404900000000	96	139	605023900000000	416007500000000	653534900000000	80	115	108521400000000	154353700000000	317880700000000	155938000000000	30	21	21	155601100000000	114753600000000	7	5	8	10	333766600000000	751804400000000	102771800000000	28	225	20	197285400000000
K00261	32907030000000	497293700000000	197688100000000	417455600000000	9	60	931720000000000	30122210000000	288993000000000	224153500000000	178555600000000	178870200000000	22321400000000	210390900000000	23263130000000	173226500000000	227295300000000	191852900000000	31748320000000	168825400000000	132046000000000	257011000000000	204161700000000	244571000000000	180986400000000	145257400000000	191472700000000	177537500000000	216024400000000	240521400000000	769353700000000	877880700000000	405938000000000	35	245	281638000000000	429261400000000	324753600000000	27	234775700000000	107070900000000	297251000000000	569911500000000	125180400000000	162771800000000	499831400000000	365	25	451217700000000
K00262	76384960000000	286845300000000	370104600000000	260439600000000	125243700000000	301863100000000	208304900000000	732623300000000	659412200000000	407428900000000	361262900000000	321344300000000	559551600000000	461296900000000	501692600000000	487357400000000	309775600000000	358772600000000	726739800000000	428553100000000	360621800000000	376094400000000	515216500000000	398759400000000	428089600000000	342308900000000	447278900000000	431833000000000	352335000000000	417364800000000	124799900000000	158105000000000	100190500000000	509052400000000	315174500000000	616564100000000	313391100000000	46621220000000	270493000000000	162104000000000	146494500000000	218823600000000	13310860000000	334223800000000	88152390000000	166236000000000	42236590000000	570593400000000	127502800000000
K00263	10	3	0	6	0	1	1	4	3	1	1	1	5	2	3	0	0	0	8	7	2	2	1	4	427336400000000	3	3	2	1	0	83145530000000	32	8	15	2	15	2	85	2	0	0	2	17	4	9	0	4	1	714136700000000
K00265	163240400000000	564431200000000	752018500000000	519012400000000	256196400000000	666265900000000	431545500000000	155687800000000	1356207000000	993320000000000	789072500000000	726433600000000	10446650000000	959118700000000	100227100000000	116131100000000	719546700000000	877790400000000	152234100000000	886930700000000	754032800000000	898767700000000	119215200000000	912346800000000	890620600000000	720357200000000	948513400000000	106273000000000	818236200000000	948357900000000	193654400000000	236473000000000	170584400000000	854243100000000	558376500000000	100992300000000	572035100000000	724947300000000	460761900000000	297402600000000	320159700000000	356015900000000	21100500000000	633423900000000	139818500000000	299149800000000	793736800000000	11166360000000	186912900000000
K00266	153312800000000	542787600000000	641382400000000	448485600000000	25146020000000	579713100000000	378910000000000	144463900000000	127370200000000	845190500000000	706731800000000	690979000000000	103197400000000	897573900000000	974826600000000	101946700000000	727502300000000	799675600000000	158429600000000	871560500000000	728240500000000	814149500000000	108497300000000	843638600000000	844456600000000	659037600000000	947524700000000	963571700000000	756283700000000	865814400000000	208382800000000	244341900000000	163333500000000	768038000000000	497967100000000	847709800000000	535872200000000	705452300000000	447917700000000	215924800000000	222833700000000	310504100000000	198826100000000	599809500000000	124993800000000	249835100000000	669180300000000	897962300000000	184011800000000
K00273	201379800000000	0	0	2	0	0	0	14311620000000	151242600000000	2	0	3	11697700000000	345436200000000	828307600000000	0	0	2	18	736365400000000	307118200000000	1	0	0	731696000000000	843387900000000	774364600000000	2	0	0	1	0	0	0	0	1	0	0	0	0	0	0	2	0	0	0	0	5	0
K00274	519177400000000	189146600000000	47706400000000	351602700000000	119544400000000	780318000000000	200083900000000	472753500000000	436959200000000	209666000000000	156307500000000	160621900000000	561707100000000	34149030000000	4210896000000	250999800000000	172455400000000	165951200000000	450532100000000	249260200000000	24038710000000	17200840000000	213824000000000	156165500000000	306480800000000	217718900000000	282429600000000	182192600000000	180555300000000	152744400000000	127635300000000	685513000000000	573739500000000	294678200000000	247619300000000	308807800000000	255342100000000	350677100000000	17	6	130420000000000	115628800000000	766839700000000	162662000000000	544982300000000	108014100000000	217195300000000	395843400000000	690923300000000
K00275	451190200000000	633705300000000	104165500000000	25	678936800000000	270615800000000	307110300000000	272720300000000	286074700000000	5635032000000	95	197194300000000	5	420090600000000	6	2	5	8	386935000000000	388742500000000	22341600000000	237338000000000	151233000000000	107341800000000	17445530000000	277718300000000	32517050000000	10	6	112860000000000	169921200000000	868673300000000	619302300000000	315269500000000	206417900000000	368712600000000	262960300000000	409114100000000	170380100000000	491680000000000	896352000000000	147362300000000	774569800000000	14285700000000	6168425000000	597166000000000	123094900000000	275091800000000	768994900000000
K00276	0	0	0	0	0	0	0	0	0	0	0	0	0	0	0	0	0	0	0	0	0	0	0	0	0	0	0	0	1	0	246669900000000	20659330000000	198244600000000	5	1	5	210419400000000	211618000000000	949095500000000	135107500000000	175367400000000	315225700000000	2	3	3	0	2	2	18
K00278	746611700000000	277265500000000	368403900000000	297786500000000	185310600000000	29018970000000	178949400000000	710909600000000	659021200000000	451492700000000	367879600000000	368426200000000	44168520000000	410865400000000	494090000000000	522946600000000	337923200000000	41428690000000	744538500000000	430792000000000	367732500000000	434600100000000	533713200000000	437715200000000	436561300000000	350064600000000	422340000000000	507377900000000	375020400000000	45859180000000	578891700000000	440338400000000	268973300000000	155773100000000	118319700000000	156415400000000	357648100000000	30134110000000	352469700000000	143672100000000	131582800000000	140971900000000	452817800000000	146589300000000	2908736000000	263197700000000	176809600000000	133874600000000	333255800000000
K00281	132060400000000	41889000000000	334188200000000	148973100000000	370066000000000	338865000000000	206903100000000	128273300000000	115747600000000	283478200000000	212686900000000	205616700000000	553408000000000	609964700000000	488085000000000	241971000000000	156889400000000	174953400000000	124412300000000	68650060000000	564179900000000	263227400000000	335043800000000	254589600000000	647927200000000	629196900000000	810667300000000	197003200000000	195250700000000	252961800000000	982031600000000	878398000000000	8807051000000	294467100000000	196739400000000	341885800000000	205978600000000	398587900000000	190935300000000	864191900000000	103045400000000	152393700000000	104274500000000	298220200000000	799212800000000	721464800000000	157367700000000	221510700000000	947141300000000
K00282	131083600000000	41789000000000	333619000000000	139312300000000	370066000000000	341865000000000	207903100000000	127148400000000	115397200000000	281978200000000	212686900000000	207116700000000	550968300000000	610132300000000	479993700000000	242971000000000	162211900000000	175453400000000	12449850000000	678051100000000	564431500000000	266395000000000	342358900000000	258589600000000	643894000000000	623598800000000	811167300000000	196003200000000	195750700000000	255961800000000	97429510000000	875898000000000	8787051000000	294467100000000	196739400000000	341885800000000	204478600000000	398587900000000	190935300000000	864191900000000	103045400000000	152393700000000	103674500000000	294220200000000	799212800000000	720464800000000	156157600000000	218510700000000	945641300000000
K00283	518935400000000	177676200000000	165353400000000	129440500000000	332114900000000	407483800000000	871465400000000	677670400000000	526234400000000	155591600000000	155170300000000	114049600000000	393829400000000	474434700000000	371960900000000	160092500000000	700616700000000	151298100000000	567722600000000	360969300000000	275515300000000	135876500000000	170147900000000	120493700000000	265000100000000	243520300000000	358425800000000	139037000000000	139961100000000	121760900000000	160174300000000	221860700000000	119584700000000	16	111666700000000	199880600000000	237136700000000	513894500000000	248958400000000	2	45	5	174676600000000	50913370000000	913135900000000	638932400000000	18	199798700000000	145325200000000
K00284	163160400000000	564431200000000	752018500000000	518912400000000	256081000000000	665765900000000	431180200000000	155652800000000	1355507000000	992369600000000	787633600000000	726066900000000	10445650000000	958268700000000	10020470000000	116044800000000	718086200000000	876127700000000	152123800000000	886530700000000	753832800000000	897946800000000	11907210000000	911913500000000	890361100000000	720357200000000	948213400000000	106144700000000	817636200000000	947233600000	192860300000000	235573000000000	16909660000000	853243100000000	557376500000000	100992300000000	570035100000000	721695200000000	456761900000000	296402600000000	320159700000000	356015900000000	20973350000000	631423900000000	139493000000000	298349800000000	789070100000000	11141360000000	186312900000000
K00285	686815000000000	345919100000000	313399900000000	371634300000000	7	4	6	512597200000000	55525140000000	118123000000000	8	616666700000000	211549900000000	147195700000000	28090370000000	136666700000000	14	95	558996700000000	312900900000000	33631860000000	10	17	161075600000000	368810700000000	236547600000000	223779100000000	133698200000000	13	14	316172000000000	128375600000000	548776000000000	111853400000000	14	227032300000000	43664100000000	455881100000000	652720600000000	126171500000000	22746360000000	440226800000000	256334500000000	10	959316000000000	24647530000000	637791100000000	74169010000000	45522750000000
K00286	346261800000000	117351500000000	153465000000000	10377330000000	555110800000000	123568800000000	947712600000000	335884100000000	293806800000000	182837100000000	158875900000000	160256000000000	241104000000000	197342200000000	229003300000000	223698900000000	140509500000000	158909600000000	346898000000000	187315200000000	171545100000000	166569600000000	217035600000000	164574600000000	193399500000000	151178900000000	207893900000000	185629100000000	158239000000000	177541200000000	544674900000000	657176300000000	360460300000000	218368600000000	12326070000000	186988900000000	128677300000000	148474700000000	103457100000000	628194200000000	789570600000000	117383300000000	485985200000000	130806100000000	316296800000000	620038600000000	172910100000000	234570600000000	430650700000000
K00287	132241100000000	527307000000000	732553200000000	417322200000000	24862830000000	627370100000000	27674970000000	129835100000000	117573600000000	768191100000000	618919700000000	66172260000000	115169700000000	723584300000000	962212500000000	104806400000000	515191000000000	643958800000000	124897200000000	806211300000000	707298600000000	650898900000000	895208900000000	707863100000000	818211600000000	641591100000000	751725700000000	838983600000000	629028600000000	747983200000000	217073200000000	229922900000000	11639180000000	150488800000000	107313500000000	188148900000000	676657200000000	495817500000000	524825800000000	138187200000000	206620200000000	209596200000000	189416700000000	482735400000000	110075000000000	381871900000000	216727700000000	176025300000000	184939300000000
K00288	515031600000000	168757500000000	212470000000000	130214900000000	638899500000000	230515700000000	141030000000000	488312200000000	433315200000000	305186100000000	243683000000000	227714500000000	381952400000000	30898840000000	321578900000000	372215200000000	235625000000000	27257130000000	517539500000000	293469900000000	238550300000000	259563600000000	383884700000000	284954100000000	278474300000000	223598100000000	317044700000000	347677700000000	258058400000000	312953400000000	502857000000000	719360600000000	484612500000000	300003500000000	159177300000000	264451000000000	186741400000000	221333500000000	128459500000000	918800600000000	706264500000000	110462100000000	673486100000000	21146500000000	408183800000000	832164000000000	212033300000000	321494100000000	570870700000000
K00290	303757500000000	969406000000000	119693300000000	123026200000000	540372300000000	623098500000000	649169200000000	28445190000000	272325000000000	122972600000000	925669600000000	100714500000000	137870700000000	125031900000000	17549400000000	119417700000000	812420400000000	101191500000000	304066700000000	186852400000000	164747400000000	129315600000000	146043300000000	118805500000000	178231000000000	139146900000000	183535200000000	115589800000000	979415900000000	120761900000000	373676900000000	46853220000000	30352820000000	125852000000000	861826400000000	148177700000000	711570100000000	134817000000000	58542920000000	20747620000000	32921570000000	451466700000000	358579500000000	119149200000000	261371300000000	373830400000000	119957000000000	143494300000000	360212100000000
K00294	136364800000000	788717500000000	540183200000000	65948050000000	76303320000000	6	938062300000000	123354500000000	103198300000000	312985800000000	26	255848000000000	489490200000000	837669400000000	766348100000000	194728700000000	143275900000000	216551700000000	117021000000000	898682900000000	623586700000000	54888040000000	352948100000000	19	866142500000000	69291460000000	70241480000000	272747900000000	356835400000000	3078125	310124700000000	153643400000000	108127200000000	252462100000000	16	253244100000000	846463300000000	894207700000000	501768600000000	30	409567100000000	474770600000000	109663200000000	218539800000000	635772900000000	988165600000000	16	326686000000000	983366900000000
K00297	465362500000000	196359400000000	185695400000000	1379108000000	815342700000000	177774000000000	132237300000000	452421300000000	401563700000000	273926900000000	212346800000000	219749300000000	361339100000000	268397500000000	299616600000000	329820200000000	222557800000000	250197600000000	469175500000000	269510700000000	231454700000000	250245000000000	322191500000000	248614100000000	264564700000000	211414900000000	276795200000000	281976400000000	220563500000000	265209700000000	590724200000000	621918200000000	437211800000000	264691800000000	117663800000000	289991000000000	168012500000000	216057600000000	139913400000000	858408400000000	143074400000000	129203000000000	582732100000000	152533900000000	412349200000000	803800500000000	227360200000000	285388900000000	547359900000000
K00298	104728300000000	2	231253200000000	3	0	0	0	7	12	0	2	3	459701500000000	45	707322900000000	3	0	0	197939400000000	960606100000000	10	1	2	2	78695650000000	35	5	1	3	0	5	9	879678500000000	0	0	1	0	5	1	0	0	0	445816700000000	1	6	0	0	0	759050100000000
K00299	0	5	0	0	5	3	0	0	0	1	2	0	2	0	1	5	0	0	0	5	0	0	1	0	0	0	333333300000000	15	0	2	65613570000000	187898500000000	604347800000000	15	0	0	106206900000000	933333300000000	15	2	5	65	15	0	1	0	1	0	252587200000000
K00301	0	0	0	0	0	0	0	0	0	0	2	0	0	0	0	0	0	0	0	0	0	0	1	0	0	0	0	0	0	0	264876400000000	115	338819000000000	1	1	1	11	448763700000000	11	11	738819000000000	19647110000000	5	0	5	0	0	0	338440700000000
K00302	573122800000000	24273100000000	501534400000000	948629200000000	888870200000000	195035800000000	843287100000000	550140400000000	448138200000000	529208300000000	360213600000000	231692500000000	568563100000000	307015000000000	483154900000000	826958200000000	619199300000000	659304800000000	458628800000000	434774800000000	355132800000000	556977100000000	655582900000000	652627800000000	299079000000000	222194300000000	456837100000000	605663000000000	602125700000000	613884600000000	393690800000000	695791400000000	22610150000000	14996130000000	15	295	260847100000000	1435013000000	483333300000000	0	35	25	141528100000000	0	15	186395200000000	1	543308700000000	438623700000000
K00303	263005900000000	690231200000000	220165700000000	427540100000000	22	296879900000000	35846890000000	307526900000000	235901000000000	251123100000000	170652100000000	149259000000000	414962100000000	641279700000000	124871900000000	121644600000000	552635400000000	120038100000000	288760700000000	155392400000000	104111500000000	242737800000000	294759200000000	212289600000000	171243600000000	131614500000000	164298200000000	218948700000000	151206000000000	275534500000000	129859300000000	830509100000000	275295300000000	4	3	192508300000000	789007200000000	262329700000000	25	325	4	4	244381400000000	125068400000000	189680800000000	473429200000000	14	121035100000000	295185900000000
K00304	0	0	0	0	0	0	0	0	0	0	0	0	0	0	0	0	0	0	0	0	0	0	0	0	0	0	0	0	0	0	777441300000000	0	0	0	0	0	0	0	0	0	0	0	0	0	0	0	0	0	0
K00305	0	0	0	0	0	123808300000000	0	0	0	174731700000000	5	370469200000000	0	0	0	2	243979100000000	456326500000000	0	0	0	2	549856800000000	25	0	0	0	6	2	174731700000000	517016200000000	131853000000000	5	1	4	225396800000000	420402900000000	573250000000000	15	7	0	1	0	1	3	306306500000000	361513200000000	131354400000000	150592200000000
K00311	0	0	0	0	0	0	5	0	1	124487400000000	9	706997500000000	0	0	0	560206200000000	128974900000000	945212900000000	0	0	0	7	933183900000000	879497100000000	1	0	0	6	35	5	132027100000000	239394600000000	7	689227200000000	719375400000000	738714600000000	137335900000000	960920700000000	25	119273800000000	466089200000000	154886900000000	3	0	45	5	463461500000000	10	223494800000000
K00313	178545400000000	305918300000000	165202200000000	808300500000000	5681755000000	584710000000000	285773500000000	194869400000000	160373300000000	226000000000000	119643800000000	12732530000000	161274500000000	168681900000000	137208100000000	281257900000000	262944800000000	170991200000000	28492630000000	137815600000000	112778400000000	193861800000000	343448000000000	187527000000000	976809100000000	782759900000000	146832400000000	25576530000000	164967500000000	165805500000000	363000800000000	433608600000000	526820700000000	362378600000000	237557800000000	477999600000000	15	983333300000000	148333300000000	1780120000000	183824600000000	201591700000000	483178200000000	161666700000000	261174900000000	924070500000000	571725400000000	392841700000000	374788600000000
K00314	50767770000000	224397600000000	451534400000000	933629200000000	888870200000000	148749400000000	753287100000000	530140400000000	388138200000000	409208300000000	251465800000000	220456300000000	458563100000000	242015000000000	463154900000000	678215200000000	431370200000000	494304800000000	403628800000000	379774800000000	325132800000000	530101600000000	521184800000000	546765300000000	274079000000000	212194300000000	393570000000000	525663000000000	398549800000000	513884600000000	316666700000000	445	5	14996130000000	15	145	0	1	0	0	35	15	65	0	0	151395200000000	5	543308700000000	4
K00315	50767770000000	224397600000000	451534400000000	933629200000000	888870200000000	148749400000000	753287100000000	530140400000000	388138200000000	409208300000000	251465800000000	220456300000000	458563100000000	242015000000000	463154900000000	678215200000000	431370200000000	494304800000000	403628800000000	379774800000000	325132800000000	530101600000000	521184800000000	546765300000000	274079000000000	212194300000000	393570000000000	525663000000000	398549800000000	513884600000000	316666700000000	445	5	14996130000000	15	145	0	1	0	0	35	15	65	0	0	151395200000000	5	543308700000000	4
K00316	1	0	0	0	0	0	0	333333300000000	0	0	0	0	0	0	0	0	0	0	0	0	0	0	0	0	0	0	0	0	0	0	90104420000000	21	3	0	0	0	3	446120700000000	2	0	0	0	0	0	0	0	0	0	101242200000000
K00317	188563300000000	151953900000000	127778200000000	414887700000000	16	34722300000000	339113900000000	182288800000000	140834900000000	36	308718600000000	43	188287700000000	163194500000000	108841900000000	343953100000000	13	303422000000000	197267000000000	936437100000000	863004700000000	258237700000000	766344400000000	346838700000000	826517000000000	655262300000000	100234700000000	455589900000000	380087900000000	247466000000000	940445900000000	127832800000000	107805700000000	478022300000000	0	379923200000000	7	120658000000000	608970600000000	3	1	2	218465000000000	115	133333300000000	267275200000000	5	124904300000000	10
K00318	670260700000000	533454700000000	33409280000000	1	0	828602600000000	1	529685500000000	674801700000000	15	4	0	389665500000000	533464400000000	246351700000000	1	0	0	646729500000000	291175600000000	217772300000000	1	5	4	273467900000000	241787000000000	361275100000000	2	2	2	381834200000000	492629400000000	646417200000000	127342400000000	456426300000000	107760600000000	201005900000000	441026500000000	243782400000000	2	15	3	666185300000000	245578600000000	706271500000000	759898600000000	19	228772200000000	691566600000000
K00319	7	16	0	0	4	0	2	2	1	5	4	3	6	5	10	8	7	11	2	2	0	240836000000000	3	4	3	3	4	5	7	5	1	0	0	0	0	0	0	0	0	0	0	0	0	1	0	2	0	0	0
K00320	5	28	0	0	767605600000000	0	4	4	3	11	5	1	4	9	12	14	11	8	7	3	3	1	2	6	9	0	2	1	6	1	0	2	2	1	0	3	0	1	0	0	0	0	1	0	1	2	0	0	0
K00322	171495300000000	0	5	0	0	1	0	0	0	5	0	15	1	0	0	0	5	5	0	0	1	0	2248	25	0	0	0	15	2	4	121632100000000	356565400000000	150458600000000	0	5	3	145201200000000	24658240000000	134935500000000	110772500000000	128563900000000	219442200000000	33585240000000	5	229172100000000	0	1	3	19363770000000
K00324	578312700000000	297522700000000	554926500000000	138814000000000	108452300000000	656708000000000	421601000000000	55827120000000	41591670000000	588736700000000	475081500000000	428155200000000	124442600000000	956114500000000	680279500000000	100827500000000	745774900000000	752954900000000	491567500000000	274782200000000	171775600000000	404977400000000	970263100000000	520822900000000	282414700000000	271453600000000	338566700000000	821740200000000	584221500000000	607946200000000	164040900000000	989044200000000	562384100000000	412661100000000	116515000000000	386496900000000	607627500000000	523416700000000	58685090000000	307389200000000	472257000000000	450142100000000	739168100000000	227643100000000	168606600000000	138564600000000	47448880000000	518282500000000	629485800000000
K00325	626183000000000	275647600000000	632341600000000	178551200000000	887028600000000	71409240000000	391894400000000	625400800000000	49382610000000	61804770000000	489465400000000	484550300000000	114163500000000	926848400000000	644056200000000	937803000000000	603379200000000	598867000000000	467783000000000	239951800000000	195929000000000	398933000000000	890184100000000	556274100000000	290389000000000	258156400000000	347525400000000	843726700000000	54742280000000	662162800000000	164447800000000	102021500000000	389532600000000	472640000000000	163036200000000	436856700000000	613636100000000	48	484072600000000	387472200000000	356187700000000	476608700000000	77675480000000	19	201666700000000	120872000000000	484981900000000	746718000000000	588636100000000
K00329	0	0	1	0	0	0	0	0	5	0	0	0	0	0	0	0	0	0	146616500000000	0	0	0	0	0	0	0	0	0	0	1	119715500000000	246681400000000	10330830000000	0	0	0	7	642391300000000	0	0	0	0	4	0	0	0	0	0	8
K00330	580066100000000	145385100000000	111789900000000	13002920000000	35	106427500000000	145	40737490000000	304872100000000	201157600000000	125799300000000	683333300000000	205277700000000	211695200000000	125855100000000	3	101549600000000	133333300000000	507196700000000	286931200000000	341971700000000	10045550000000	141271400000000	11874800000000	279071300000000	355330300000000	36106590000000	901203600000000	815476200000000	747863200000000	36986040000000	398914500000000	224037500000000	471672600000000	894412800000000	143197300000000	145934200000000	120174800000000	74653100000000	437719300000000	3	31937980000000	349786900000000	831238500000000	407040600000000	198966100000000	483333300000000	631075100000000	255463800000000
K00331	433135200000000	162194400000000	159859700000000	457312000000000	902808800000000	21685670000000	127862300000000	416666500000000	364818200000000	227906900000000	186577400000000	147418200000000	367909900000000	305211500000000	154072200000000	327631300000000	258364300000000	19495780000000	360473500000000	189727800000000	150361700000000	165925400000000	30752460000000	160275400000000	198603500000000	145160100000000	181749100000000	238397100000000	171014500000000	185095100000000	96955680000000	923347000000000	143463900000000	372853200000000	158137800000000	632608000000000	277951800000000	396169500000000	347050700000000	19282190000000	230705200000000	267616100000000	110154900000000	347352600000000	988957200000000	114471900000000	315084600000000	427800200000000	177807900000000
K00332	229724000000000	263570800000000	266707300000000	940583000000000	105	128646800000000	511256600000000	227973400000000	188714800000000	458593700000000	286961500000000	195	17657970000000	188784200000000	118013500000000	3	163333300000000	109056200000	259409300000000	146629200000000	980732400000000	595683400000000	622127800000000	539072400000000	10906970000000	132879600000000	165519600000000	415428700000000	345	346949800000000	254574400000000	208426100000000	223467000000000	10435370000000	678254200000000	115484400000000	450811300000000	107528000000000	275401000000000	188333300000000	17579200000000	405350500000000	205150300000000	683270700000000	204906800000000	213561200000000	435480800000000	6033890000000	306098900000000
K00333	945292500000000	423077700000000	282214700000000	156840300000000	192101400000000	46138130000000	305834700000000	98897820000000	829137300000000	470077200000000	374071700000000	355890700000000	821724700000000	707488000000000	47734970000000	740097800000000	507787400000000	449644300000000	909367800000000	486450200000000	420629900000000	394138300000000	684961800000000	441481800000000	447860700000000	45803190000000	563457200000000	578716000000000	457959600000000	429657100000000	349364100000000	312385400000000	332366600000000	137783500000000	84679300000000	159950400000000	104326400000000	172256900000000	732740600000000	483781500000000	327342100000000	713650000000000	357470300000000	128327100000000	335289000000000	366617000000000	736657000000000	104114300000000	4233646000000
K00334	445761700000000	180866400000000	25862710000000	331611000000000	154006500000000	108774400000000	105389600000000	400277100000000	401278600000000	268053400000000	234079200000000	226439600000000	29091430000000	255854100000000	366629800000000	271025500000000	263744500000000	237794800000000	435329800000000	289600500000000	276463300000000	287242400000000	281775900000000	200205100000000	303460100000000	193948500000000	290083400000000	216516600000000	230584400000000	256109600000000	142089000000000	177892400000000	11706310000000	57014330000000	321207700000000	627555500000000	124327800000000	443960000000000	182644400000000	222130500000000	211817700000000	206936600000000	153843600000000	284497600000000	645909300000000	976242000000000	354683000000000	238161600000000	113060700000000
K00335	291016700000000	114826400000000	163701100000000	193284400000000	921905200000000	792978300000000	740286300000000	264899100000000	259707400000000	164996600000000	148360800000000	159395800000000	166581100000000	14148210000000	231786200000000	18181230000000	157638600000000	159524100000000	287904000000000	173636300000000	148394400000000	182169400000000	171722200000000	169830600000000	167637100000000	132305600000000	169766800000000	151737600000000	14066200000000	167721100000000	67817760000000	818730900000000	577467500000000	265867800000000	183596000000000	263936000000000	106009200000000	226429300000000	806009900000000	562130500000000	72192650000000	966229100000000	649671400000000	172327000000000	366933000000000	650023100000000	152070900000000	236838000000000	688828900000000
K00336	414661300000000	160214700000000	200071400000000	205642800000000	795475100000000	106006800000000	125053300000000	394101700000000	350660500000000	22385660000000	182489400000000	194215000000000	276922100000000	271508300000000	302424900000000	263760100000000	214211100000000	219521600000000	414830000000000	238996500000000	209017700000000	218279600000000	263550200000000	20906070000000	235411600000000	18084080000000	244535500000000	218279600000000	196164600000000	220945400000000	923492100000000	112497900000000	762705500000000	349264100000000	207657900000000	403944200000000	192535400000000	29232560000000	17804070000000	104889400000000	122154600000000	168350700000000	902334600000000	260518100000000	478207500000000	909428900000000	319392300000000	361265100000000	874180200000000
K00337	125206400000000	648538200000000	698972500000000	186973800000000	391336000000000	92742100000000	65433780000000	126170900000000	100777200000000	96003010000000	723841800000000	763858400000000	15345720000000	100368200000000	834870200000000	140266400000000	92486760000000	955628500000000	985730900000000	535237100000000	495359000000000	757621300000000	12162050000000	878513300000000	532830400000000	523397700000000	677643100000000	115912500000000	795573300000000	926770700000000	241426600000000	1977588000000	20606030000000	129876700000000	887173300000000	124344500000000	772922800000000	987571300000000	578660900000000	793108000000000	635050200000000	990136000000000	25719040000000	725242200000000	165560000000000	368467100000000	913640400000000	144916000000000	246234100000000
K00338	246760600000000	127780300000000	682355400000000	523230500000000	646117700000000	810693900000000	106589300000000	249426900000000	209598200000000	149822700000000	114729300000000	126250800000000	242764900000000	206240300000000	142133500000000	218028400000000	182354100000000	144071400000000	24073690000000	100938600000000	101500000000000	9489957000000	209294700000000	135140700000000	915481700000000	110425400000000	142623100000000	147508500000000	119520400000000	1553816000000	647221000000000	740188300000000	547541900000000	301259200000000	224095400000000	241314900000000	198334100000000	14916430000000	168783800000000	246387400000000	144320800000000	187368100000000	830309500000000	220429500000000	606355300000000	815274900000000	174861400000000	327316100000000	489478900000000
K00339	109458300000000	206894300000000	113303600000000	145	133333300000000	339832300000000	116666700000000	93612160000000	112667400000000	143333300000000	124620300000000	208870600000000	160672100000000	133398400000000	105	386660300000000	739670900000000	894703600000000	742445000000000	534130900000000	364216100000000	250842500000000	149652000000000	234156600000000	494735000000000	387397100000000	523247300000000	151723700000000	134240500000000	263506000000000	496452000000000	651649600000000	461127900000000	149259300000000	123065700000000	226177400000000	165457100000000	177197800000000	7	4	3	675914500000000	760303600000000	177580500000000	936876900000000	663500600000000	868171600000000	170525300000000	884072600000000
K00340	887907400000000	329143700000000	138157400000000	2	15	121679100000000	738288800000000	413033600000000	450574900000000	941597400000000	134083400000000	106666700000000	347078300000000	387406400000000	233029900000000	589855700000000	662907500000000	4	533600500000000	484039900000000	164705000000000	125222400000000	142443300000000	301695400000000	501193000000000	311919300000000	56304030000000	566666700000000	25	124907300000000	29514200000000	185273500000000	180791400000000	383333300000000	333333300000000	135435200000000	136356800000000	158297700000000	118669100000000	4	338279300000000	841662300000000	356263100000000	508753900000000	150556400000000	202286800000000	133333300000000	918958300000000	275987800000000
K00341	117415300000000	404245500000000	201989500000000	131352200000000	44985080000000	34417540000000	33228060000000	109766500000000	977812100000000	284496800000000	243857600000000	203714600000000	358268700000000	429381200000000	292455500000000	157377100000000	138440800000000	141803500000000	111608900000000	645111300000000	508225400000000	355540200000000	471324000000000	322308500000000	534201600000000	551652400000000	796095500000000	286047000000000	235134800000000	309786100000000	805457700000000	748057600000000	775714700000000	275227900000000	188761800000000	341723100000000	198344800000000	301846300000000	12810030000000	539927200000000	59072510000000	785077800000000	801991600000000	233758600000000	757847500000000	592986800000000	160746600000000	208580100000000	859958800000000
K00342	435434400000000	179029400000000	111677000000000	142403600000000	119690700000000	151783600000000	140840600000000	485385900000000	363316100000000	598834400000000	691844300000000	51190020000000	811402300000000	114974200000000	679238800000000	407618200000000	500786800000000	453697400000000	32518340000000	211567800000000	181181900000000	112015100000000	106430400000000	782643600000000	19427820000000	224249100000000	255092900000000	897733200000000	729430500000000	636108900000000	29419490000000	228392500000000	318453500000000	116552200000000	725965800000000	126162900000000	721230700000000	131104600000000	525269800000000	358312200000000	487396600000000	736108700000000	315026400000000	897989800000000	262441300000000	268139900000000	669510100000000	957788300000000	360537500000000
K00343	484162300000000	229124100000000	111502500000000	573017800000000	301922700000000	180396200000000	52127430000000	490609500000000	429025700000000	160815300000000	166734700000000	148555100000000	251271800000000	204821300000000	132233400000000	177628000000000	191453900000000	137829200000000	453842800000000	27012930000000	234440500000000	22024080000000	279225000000000	212549100000000	234141900000000	250979100000000	335530200000000	180913000000000	124910500000000	179468500000000	300465400000000	288423500000000	284704400000000	117426700000000	803963900000000	147451500000000	65694140000000	100808500000000	300946100000000	429442900000000	47271520000000	687007100000000	307686200000000	904842700000000	188016000000000	28049250000000	644654000000000	103938800000000	330423100000000
K00344	156498000000000	374453200000000	112241600000000	819757400000000	30	904535700000000	919527400000000	163123700000000	124926000000000	137355100000000	110895000000000	129465900000000	176833000000000	154043800000000	190202300000000	110576600000000	64597760000000	896520300000000	228743500000000	124068000000000	128088500000000	15061050000000	170141500000000	119691500000000	949638200000000	999406400000000	120056500000000	113822100000000	855832100000000	142173000000000	138172700000000	887362800000000	559851200000000	101761600000000	761227800000000	82791550000000	898164800000000	737249400000000	874879000000000	97056790000000	767738000000000	840594700000000	862709400000000	287886300000000	571953400000000	779451200000000	101900200000000	528659500000000	702576900000000
K00346	418210700000000	130930900000000	646299100000000	111666700000000	454610500000000	136608400000000	510996300000000	331250800000000	312292100000000	575806600000000	487955800000000	271409600000000	971847100000000	881644000000000	671504300000000	211633500000000	116501700000000	164870100000000	333075400000000	179396000000000	140518800000000	546861200000000	674949200000000	647618300000000	175690300000000	187676500000000	242318200000000	457280600000000	315392200000000	457839900000000	289631300000000	258213900000000	298959000000000	111379500000000	418329400000000	130694900000000	757644900000000	149303400000000	544271400000000	217466800000000	307788800000000	533593700000000	277175800000000	712400100000000	239335900000000	250769600000000	486560800000000	688960300000000	314798600000000
K00347	446805100000000	162639100000000	129064200000000	130975200000000	504819200000000	967121100000000	118746600000000	4056992000000	372139400000000	185482300000000	14723640000000	1507232000000	246298900000000	20888230000000	237712200000000	188383700000000	13875360000000	145445600000000	441618200000000	248239700000000	203834400000000	185683000000000	222118000000000	182463600000000	238152200000000	205274400000000	279896900000000	191925600000000	143320800000000	182374200000000	87525860000000	942344400000000	729442300000000	300260900000000	223583200000000	38775790000000	16927000000000	291657400000000	128346900000000	595443900000000	811693100000000	125506700000000	839346300000000	255133000000000	570564600000000	876284900000000	269066800000000	394198700000000	821661600000000
K00348	163010400000000	666994000000000	426929500000000	75	6	461780600000000	186001400000000	165922900000000	141000800000000	150484500000000	210201900000000	121666700000000	381996400000000	427354300000000	423612500000000	35	3	667772000000000	180854300000000	106284900000000	124054100000000	323151300000000	45245470000000	355566900000000	64790850000000	115860700000000	947042800000000	173730400000000	101666700000000	115751900000000	37943650000000	231907800000000	16532950000000	129347600000000	127298500000000	147168500000000	140115100000000	120420300000000	115614800000000	118885400000000	199336100000000	241727400000000	276426600000000	981380100000000	149222000000000	141590500000000	126986600000000	94163420000000	198651800000000
K00349	144998100000000	400278100000000	133403100000000	4	2	266954300000000	123814300000000	120090900000000	912692200000000	115	213521600000000	9	136696100000000	170775100000000	19267820000000	25	2	232228000000000	120821100000000	622260000000000	614998800000000	214675300000000	234202100000000	125853000000000	57364950000000	540350500000000	783318300000000	126269600000000	138333300000000	225192300000000	735486300000000	768795300000000	627388000000000	265222700000000	112392300000000	231330300000000	177961600000000	38299150000000	16689450000000	120460800000000	187535800000000	229637600000000	907208800000000	186514400000000	646233700000000	85894120000000	55	189889300000000	724103100000000
K00350	117385200000000	458800700000000	239941700000000	574054600000000	1	470688600000000	826312700000000	135077400000000	109531000000000	13	796937500000000	10328120	110132200000000	144508200000000	157598200000000	2	2	75	127234100000000	457745800000000	462073300000000	322404600000000	397953500000000	181108200000000	682212900000000	525918900000000	703806800000000	160205500000000	187477800000000	266814100000000	776275700000000	817512200000000	597675300000000	196088100000000	223026600000000	225763800000000	114759100000000	565681600000000	20541110000000	35	146149000000000	229499500000000	904063800000000	210612200000000	779542000000000	925656600000000	142717400000000	215526700000000	112047800000000
K00351	339258100000000	925418100000000	583073600000000	10	8	865159900000000	485	325872500000000	299769800000000	438327400000000	431815900000000	373385400000000	498167100000000	566393800000000	412073700000000	13	5	75	269274400000000	175394500000000	156849800000000	486198200000000	618392400000000	416224600000000	15349890000000	166959100000000	219277100000000	414523300000000	237522200000000	583071500000000	268498600000000	207610300000000	237791200000000	961057700000000	74091890000000	115505700000000	75990220000000	14684800000000	470591200000000	235	236524700000000	439492200000000	256921400000000	763287000000000	226232400000000	240345800000000	676687600000000	847722900000000	293158500000000
K00354	621007500000000	334064500000000	536526900000000	226341900000000	112045200000000	685793700000000	26422810000000	62254150000000	43018420000000	529416900000000	457132300000000	43327200000000	128811000000000	961599100000000	772461900000000	871842400000000	583367200000000	578011200000000	571151600000000	251980900000000	195483800000000	364182500000000	832841100000000	539781700000000	290383800000000	313829200000000	372906300000000	793006600000000	528513200000000	631903200000000	162002400000000	105494000000000	478079100000000	315018700000000	109097800000000	369194700000000	902072300000000	525274600000000	420709800000000	294056300000000	14793540000000	456242800000000	807238300000000	18033900000000	24	109522700000000	469441700000000	491291800000000	510638600000000
K00355	243373300000000	168432600000000	290278500000000	427091300000000	603244900000000	302696300000000	111741900000000	205435400000000	159428600000000	214894300000000	162144300000000	137872900000000	482447600000000	205788600000000	276205200000000	388356000000000	189541800000000	26178410000000	199251400000000	129866900000000	83447490000000	112508800000000	26938660000000	164167700000000	130340100000000	928297000000000	142223600000000	25111800000000	172507800000000	22392110000000	199174700000000	594998900000000	182133000000000	105466100000000	175324300000000	189873400000000	276347900000000	153085500000000	147895000000000	166814200000000	687300500000000	128242200000000	263476100000000	6	394640100000000	710128300000000	292345300000000	174716000000000	218300800000000
K00356	0	0	1	0	0	0	0	0	5	0	0	0	0	0	0	0	0	0	146616500000000	0	0	0	0	0	0	0	0	0	0	1	119715500000000	246681400000000	10330830000000	0	0	0	7	642391300000000	0	0	0	0	4	0	0	0	0	0	8
K00362	815499400000000	290149900000000	231519300000000	20898900000000	876636800000000	204138500000000	225337800000000	699467700000000	5727340000000	494592100000000	386017600000000	40089820000000	522676300000000	402942100000000	438157000000000	400711600000000	548722200000000	431077300000000	862619200000000	410467000000000	442593100000000	54331830000000	522460200000000	461704700000000	466501800000000	348068500000000	476656600000	458113600000000	456635900000000	476231100000000	721899800000000	317616700000000	184438300000000	713455000000000	395399900000000	860449900000000	976308600000000	145603400000000	104928300000000	821485800000000	803306700000000	120941600000000	134509400000000	27815890000000	690995300000000	435510900000000	963709300000000	15477180000000	160159300000000
K00363	0	0	0	0	0	0	0	0	0	0	0	0	0	0	0	0	1	0	0	0	0	0	0	0	1	0	1	0	1	0	687128200000000	376353300000000	325133700000000	3	818007300000000	7	21025580000000	269051500000000	343070100000000	403026900000000	319276700000000	46297350000000	11	5	133333300000000	1	2	2	17440950000000
K00364	283333300000000	45	4	315168800000000	12	2	0	36	388479800000000	55	5	8	10	154691800000000	8	8	11	5	415067400000000	12	5	8	3	3	1739608000000	10	20	433333300000000	35	3	415089900000000	545999200000000	524804200000000	111377400000000	16	162969800000000	15	946926100000000	922838100000000	155211600000000	211345000000000	382732100000000	14536	164592000000000	65	384617700000000	144239500000000	124152500000000	324318400000000
K00365	0	0	0	0	0	0	0	0	0	0	0	0	0	0	0	0	0	0	0	0	0	0	0	0	0	0	0	0	0	0	175943900000000	0	145895000000000	0	0	0	349725600000000	0	0	0	0	0	0	0	0	0	0	0	0
K00366	245544700000000	797595500000000	156382900000000	132538000000000	651820400000000	111680200000000	930106400000000	203282700000000	177622400000000	204685100000000	15443850000000	16985270000000	114461400000000	128559000000000	156537100000000	186391800000000	2314850000000	198576800000000	283033200000000	137437600000000	166870300000000	143012200000000	220657500000000	18182070000000	162326200000000	997168500000000	140124300000000	199512000000000	216932800000000	179108200000000	372858100000000	952572700000000	445755800000000	378098500000000	140844100000000	37843220000000	268736900000000	409361200000000	85	212644300000000	178826100000000	337766800000000	1353125	3	85	204850700000000	372480700000000	69215700000000	461826000000000
K00367	56064420000000	0	0	0	0	0	0	2	2	3	0	0	1	8	3	0	0	1	5	1	1	0	2	1	0	0	3	2	0	0	175424300000000	605889600000000	360188900000000	1	48199270000000	5	480812800000000	261334500000000	256158700000000	157333800000000	260837600000000	452619500000000	21	9	5	0	0	3	287217400000000
K00368	424486400000000	13	38754600000000	184208100000000	286268600000000	466840200000000	650799300000000	444531600000000	144515500000000	711071400000000	474193900000000	574866100000000	708854600000000	378740300000000	388100300000000	763230400000000	798467000000000	57322630000000	436490100000000	232509800000000	912059400000000	842203500000000	162691800000000	941543900000000	183219000000000	173632500000000	282583600000000	984809000000000	679943100000000	762721900000000	2132554000000	535295200000000	304091500000000	969551100000000	558816400000000	114448700000000	125572700000000	141886000000000	114082200000000	725185200000000	172665500000000	151728400000000	33516450000000	429095200000000	261149200000000	185170700000000	474172300000000	47608230000000	596813600000000
K00370	125173900000000	293058500000000	91797390000000	222953300000000	134476900000000	630459600000000	306125100000000	143333400000000	102683900000000	194235800000000	128691500000000	9542992000000	117188000000000	829340300000	76485730000000	246617700000000	305525100000000	175286100000000	12457640000000	675590300000000	56339450000000	17388710000000	278047900000000	219137600000000	569949500000000	523856000000000	573029900000000	187405400000000	119902500000000	153710100000000	492516600000000	281574400000000	18240380000000	229255000000000	109136200000000	18135990000000	138353400000000	85834860000000	846167100000000	220243700000000	16769890000000	216560800000000	192290400000000	599105800000000	792176300000000	199947500000000	167119000000000	130866100000000	171264100000000
K00371	664854100000000	212768800000000	595915000000000	123802200000000	45	45	45	696318500000000	266384600000000	85	113788200000000	644581300000000	545435400000000	323747100000000	232574100000000	9	13	843224300000000	617480500000000	203837200000000	240047300000000	907711700000000	199758400000000	110871900000000	187782600000000	209853700000000	147375800000000	766883100000000	862406800000000	941871900000000	154690900000000	7955883000000	701705000000000	80290330000000	904656800000000	201352000000000	318590800000000	392475800000000	211646100000000	19998130000000	211981100000000	272988700000000	423512900000000	799735400000000	117967500000000	273216800000000	134406900000000	887204600000000	413765500000000
K00372	269953300000000	0	180532000000000	3	15	762863800000000	105	126625100000000	25	28	297109800000000	400471900000000	26	16	15	248743000000000	866164200000000	40	365568000000000	24465030000000	335	38187540000000	270589000000000	343705000000000	26	765839700000000	9883654000000	25	418575900000000	387234300000000	230396300000000	662326000000000	406375600000000	2	48199270000000	6	430812800000000	285134900000000	206929900000000	167333800000000	295837600000000	492619500000000	1453125	6	6	15	3	11	3095226000000
K00373	108640300000000	673317200000000	286111100000000	589245300000000	4	533649300000000	25	17427370000000	138438800000000	55	306529500000000	830169900000000	170469400000000	216800500000000	167035400000000	758415800000000	408415800000000	306775700000000	195375	129873100000000	661796500000000	365413000000000	5	75	107813400000000	164109100000000	753061200000000	536363600000000	5	8	82354060000000	340262300000000	244018200000000	1321727000000	754142000000000	133008200000000	768144900000000	119190800000000	860687500000000	10698350000000	88679090000000	142425100000000	18785450000000	3	571502600000000	123549500000000	823534300000000	944515500000000	32499020000000
K00374	215509600000000	103741700000000	289781300000000	834471900000000	3	947032500000000	2	397688600000000	472832700000000	533333300000000	145269500000000	555418700000000	509303200000000	382470700000000	423056000000000	241584200000000	741584200000000	9	514362200000000	374189100000000	150923100000000	65	145876500000000	109595200000000	196491600000000	197472200000000	309727500000000	175157400000000	147093500000000	145812800000000	191783300000000	134631400000000	670662700000000	139409500000000	62572190000000	969049200000000	937949500000000	489657400000000	626784100000000	151552600000000	105679700000000	120763500000000	116060500000000	313384600000000	558018800000000	793983800000000	938427100000000	662482500000000	655936100000000
K00375	548722200000000	160198100000000	199614400000000	163648300000000	871675900000000	157735500000000	118481800000000	506424200000000	448825300000000	261248000000000	218690700000000	238492200000000	361584500000000	280960800000000	317852100000000	29441510000000	215358100000000	235092500000000	560372500000000	32732190000000	266351900000000	257119700000000	311590500000000	248233000000000	298508700000000	22892930000000	331121200000000	285264500000000	231431900000000	260739100000000	34037350000000	234847700000000	124406600000000	172129900000000	121003400000000	163372500000000	145672200000000	131604100000000	142763800000000	163723500000000	152337000000000	173530900000000	197343000000000	577013000000000	103434900000000	190377100000000	184133400000000	111983000000000	153179700000000
K00376	0	0	0	0	0	0	0	0	0	0	0	0	0	0	0	0	0	0	0	0	0	0	0	0	0	0	0	0	0	0	956072800000000	24823630000000	650253800000000	0	0	0	1381439000000	813470700000000	1	0	0	0	0	0	0	0	0	0	94640620
K00380	299875200000000	138956500000000	514833900000000	431987900000000	14	11689840000000	470930500000000	31274910000000	26803160000000	946311800000000	847395100000000	117070700000000	624469900000000	844864100000000	716212300000000	672690000000000	11985000000000	742273400000000	313736300000000	211691000000000	188669200000000	112618900000000	116763400000000	114654500000000	18823850000000	161716800000000	201407800000000	729548200000000	979559300000000	11333220000000	287416200000000	210561200000000	170811500000000	938888800000000	662629800000000	110608100000000	766136400000000	115683900000000	432661700000000	352730500000000	472810800000000	659765200000000	217769100000000	673345700000000	144285300000000	404951300000000	795718500000000	142853400000000	264499800000000
K00381	244544700000000	797595500000000	156382900000000	131538000000000	641820400000000	107051600000000	795106400000000	197738800000000	165242600000000	189201300000000	141897000000000	168729100000000	105461400000000	123559000000000	154537100000000	169834000000000	214702000000000	181183700000000	276033200000000	133437600000000	162256700000000	138847200000000	20973250000000	173234500000000	159621600000000	987168500000000	135569900000000	191512000000000	196918300000000	167108200000000	272497000000000	765005300000000	355755800000000	30	116932500000000	307549100000000	238736900000000	338414200000000	6	178451900000000	131800800000000	294064500000000	11	3	75	201850700000000	372480700000000	622889400000000	328478300000000
K00382	209165200000000	825086900000000	911187400000000	454039600000000	182112500000000	106507000000000	517301600000000	202282200000000	167595100000000	909298900000000	863987400000000	818714300000000	211832000000000	146687400000000	147427200000000	139874800000000	93973720000000	874746700000000	195374100000000	103798200000000	979153800000000	774176500000000	138720100000000	870433800000000	102065300000000	935881500000000	117952300000000	122596200000000	878284400000000	105782500000000	314990100000000	251282100000000	165985200000000	207233100000000	13069700000000	163379100000000	176224200000000	144640300000000	168754800000000	165029400000000	140320200000000	151946300000000	245197800000000	79247380000000	159502400000000	201489400000000	182887600000000	127266400000000	196396500000000
K00383	20124900000000	257396900000000	178084700000000	138247200000000	870358200000000	617104900000000	100773600000000	228052800000000	204714400000000	16973340000000	149564600000000	129724300000000	297654000000000	22102760000000	244683700000000	271991000000000	186655000000000	177162500000000	243200900000000	144560100000000	866111400000000	159619300000000	321224500000000	179373900000000	103861100000000	114526300000000	112077400000000	242740200000000	155408500000000	222651000000000	124518700000000	964054000000000	418931500000000	15	568879700000000	125	418067800000000	307660200000000	402903000000000	13108200000000	172215500000000	238019800000000	319373100000000	9	205226100000000	617787000000000	210838100000000	223409900000000	350517200000000
K00384	731990500000000	266215500000000	314801100000000	304076600000000	136528500000000	246992600000000	193321800000000	689941200000000	585426600000000	411133300000000	339232200000000	329988700000000	597635400000000	438082200000000	53568110000000	503724800000000	339324900000000	379268300000000	724617000000000	413812500000000	349165200000000	378387500000000	516554300000000	374921700000000	396994400000000	319449800000000	440335300000000	443101300000000	355243600000000	390322600000000	179702700000000	188535600000000	104012300000000	464030700000000	287261600000000	438632800000000	600197100000000	551394500000000	450020900000000	250675000000000	215089600000000	293574000000000	133160100000000	397780200000000	693723200000000	123129600000000	411239200000000	498640800000000	118211300000000
K00385	589161600000000	285822500000000	705590700000000	289946700000000	167109300000000	139126500000000	159899600000000	608081300000000	60421990000000	40722850000000	416387600000000	620050100000000	364504500000000	260843900000000	414161200000000	437741800000000	116163400000000	411644500000000	905262100000000	509732200000000	607392900000000	668188600000000	394343100000000	383867300000000	642227400000000	298964600000000	304977800000000	333398300000000	382904900000000	570939500000000	405212500000000	340132300000000	257469300000000	786805600000000	7	656147500000000	45	721276600000000	2	333333300000000	729207400000000	762268500000000	220537700000000	35	814539900000000	167726700000000	253965000000000	545046600000000	320660100000000
K00389	333333300000000	0	5	1	666666700000000	0	0	0	0	0	0	0	0	0	0	0	333333300000000	0	5	0	0	0	1	0	0	0	0	0	0	1	154477500000000	762099900000000	133333300000000	5	333333300000000	125684300000000	596582500000000	25	529429400000000	0	45	161438200000000	5	2	833333300000000	5	133333300000000	2	15
K00390	18465220000000	58648090000000	981126300000000	737893500000000	513482600000000	101174300000000	670481600000000	177775200000000	167189800000000	128088800000000	107469600000000	109214000000000	529634300000000	545483300000000	113396400000000	13199320000000	789749000000000	106603300000000	206863000000000	124135300000000	108084900000000	140917700000000	140359700000000	118215400000000	117861100000000	929395300000000	100672900000000	119579900000000	109539800000000	132898300000000	293291600000000	30654910000000	187897500000000	117715200000000	818414900000000	145128200000000	61633940000000	107532200000000	646321600000000	354077700000000	452242800000000	494413200000000	293749400000000	933340100000000	190794300000000	58202780000000	945333800000000	191357400000000	263479600000000
K00392	244544700000000	797595500000000	156382900000000	131538000000000	641820400000000	107051600000000	795106400000000	197738800000000	165242600000000	189201300000000	141897000000000	168729100000000	105461400000000	123559000000000	154537100000000	169834000000000	214702000000000	181183700000000	276033200000000	133437600000000	162256700000000	138847200000000	20973250000000	173234500000000	159621600000000	987168500000000	135569900000000	191512000000000	196918300000000	167108200000000	204274700000000	655005300000000	350755800000000	30	116932500000000	307549100000000	198736900000000	278414200000000	5	178451900000000	131800800000000	294064500000000	11	3	75	201850700000000	372480700000000	622889400000000	261308500000000
K00394	31306600000000	67050810000000	18026780000000	135181600000000	708955500000000	110164500000000	516266900000000	29652020000000	276827500000000	182485200000000	149668000000000	136062200000000	645765200000000	85951240000000	17310740000000	176626900000000	926052400000000	16115530000000	306066600000000	183554100000000	179330100000000	185587800000000	194668000000000	171135500000000	19164320000000	137920500000000	162236700000000	162652900000000	142530100000000	183438000000000	15361480000000	207442000000000	82021470000000	726174300000000	473333300000000	731939300000000	27	261666700000000	17	975	108333300000000	21426720000000	897720800000000	325503500000000	341230600000000	45924860000000	838102700000000	129346400000000	797480900000000
K00395	901392800000000	352132900000000	138248900000000	209809600000000	971076600000000	193927000000000	134712900000000	811516100000000	736256200000000	415757400000000	337682000000000	305195800000000	649491700000000	520170800000000	455438600000000	562351700000000	543391500000000	334195600000000	932489300000000	465819200000000	417958900000000	376703200000000	523381100000000	354754700000000	479361900000000	351766500000000	584779800000000	429690700000000	366100000000000	398231600000000	629234600000000	812817200000000	203340300000000	162739700000000	157165000000000	182457800000000	8	50114170000000	599307800000000	670259000000000	104919400000000	833333300000000	545609300000000	152406400000000	206728200000000	875965100000000	181165200000000	275325900000000	53524390000000
K00399	147156000000000	828300900000000	0	0	162701000000000	0	175402000000000	476444400000000	823783400000000	105995000000000	183330100000000	292862600000000	106988100000000	587221100000000	294412100000000	202696500000000	202375900000000	145924100000000	876444400000000	6	673574100000000	131639100000000	168254100000000	136955100000000	6	852921300000000	709642500000000	543610500000000	673574100000000	994962200000000	1	10	2	1	5	0	0	2	0	0	0	1	1	1	2	1	0	0	5
K00400	3	17	1	0	2	4	8	4	4	5	10	15390940000000	10	3	14	940882700000000	19	7	9	2	3	7	5	603193400000000	6	3	1	1	7	5	0	2	0	0	0	0	0	0	0	0	0	0	0	0	0	0	1	1	0
K00401	2	36	0	0	12	0	5	5	6	7	110603400000000	9	12	4	11	19	13	13	8	0	3	7	7	3	5	3	3	0	3	1	2	1	0	0	1	0	1	0	0	0	0	2	1	0	1	1	0	0	1
K00402	12843990000000	176494000000000	0	0	472989800000000	0	545979700000000	423555600000000	376216600000000	440050400000000	266698700000000	371373600000000	23011920000000	412778900000000	955878700000000	127303500000000	103522300000000	340759500000000	723555600000000	1	126425900000000	683609000000000	717459300000000	130449100000000	3	147078700000000	19035750000000	356389500000000	126425900000000	305037800000000	0	0	1	0	5	0	0	0	0	0	0	0	1	0	0	1	0	0	5
K00404	0	1	0	0	0	0	0	0	0	0	0	0	0	0	0	0	0	0	1	0	0	0	0	0	0	0	0	0	0	0	232345700000000	551666700000000	212099200000000	0	0	0	401324800000000	206181800000000	25	0	0	0	0	0	0	0	0	0	382351300000000
K00405	0	0	0	0	0	0	3	0	0	856692900000000	0	1	0	0	0	809558800000000	747508000000000	10	0	0	0	45	4	5	0	0	0	2	1	6	417165400000000	15	130099700000000	155955900000000	531058000000000	5	653418400000000	260170300000000	1	10	106842100000000	996911200000000	0	0	0	1	1	810792300000000	473690800000000
K00406	1	1	0	0	0	0	0	0	0	0	0	0	0	0	1	0	0	0	3	4	0	0	0	0	0	0	0	5	0	0	486502900000000	19	968449600000000	0	0	0	55	705013800000000	0	0	0	0	4	0	2	0	0	0	115260000000000
K00407	0	0	0	0	0	0	0	0	0	0	0	0	0	0	0	0	0	0	0	0	0	0	0	0	0	0	0	0	0	0	11166860000000	5	0	0	0	0	0	0	0	0	0	0	0	0	0	0	0	0	15
K00410	0	0	1	0	0	0	0	0	0	0	0	0	0	0	0	0	0	0	0	1	0	0	0	0	0	0	0	0	0	0	885981200000000	216080100000000	4	0	0	0	5	9	1	0	0	0	0	0	0	0	0	0	120726100000000
K00411	0	0	0	0	0	0	0	0	0	0	0	0	0	0	0	0	0	0	0	0	0	0	0	0	0	0	0	0	0	0	217678800000000	753425800000000	0	0	0	0	25	0	0	0	0	0	0	0	0	0	0	0	680961900000000
K00412	0	0	1	0	0	0	296	0	0	131578900000000	148	1	0	0	0	238095200000000	539735100000000	131578900000000	0	1	0	1	4	3	0	0	0	148	0	2	885981200000000	216080100000000	4	548	938823500000000	684705900000000	5	9	1	724324300000000	638095200000000	347058800000000	0	0	0	4	0	196	120726100000000
K00413	0	0	1	0	0	0	0	0	0	0	0	0	0	0	0	0	0	0	0	1	0	0	0	0	0	0	0	0	0	0	286967700000000	835730300000000	0	0	0	0	2	352357000000000	0	0	0	0	0	0	0	0	0	0	788222700000000
K00424	0	0	0	0	0	0	0	0	0	0	0	0	0	0	0	0	0	0	0	0	0	0	0	0	0	0	0	0	0	0	5	116666700000000	5	0	0	0	0	0	0	0	2	198701300000000	0	0	0	0	0	0	5
K00425	630735100000000	181257500000000	179360900000000	115820800000000	364404000000000	150998500000000	269556400000000	602807500000000	536159400000000	190234400000000	123334100000000	112593700000000	269931500000000	299386000000000	181894900000000	186887400000000	18989180000000	15373420000000	546298000000000	356337100000000	24185930000000	2028355000000	281031400000000	218999500000000	267724700000000	293165400000000	403341500000000	198714400000000	138685900000000	178660000000000	412025800000000	376470300000000	378003300000000	142968600000000	934891800000000	163739900000000	115596400000000	168641100000000	103710400000000	716664300000000	869850500000000	133237000000000	396685700000000	165956000000000	334699400000000	377873900000000	100980500000000	168269800000000	418289000000000
K00426	419322700000000	114684600000000	999054700000000	774231900000000	19577300000000	943339200000000	183718500000000	407989000000000	35030060000000	153016300000000	125427000000000	114315700000000	240885000000000	17842210000000	145887000000000	180381700000000	137713000000000	120153300000000	391889000000000	201317200000000	179671700000000	18237230000000	255878200000000	173905600000000	202591000000000	153623100000000	28457150000000	17532810000000	139119500000000	16785160000000	273374100000000	251940200000000	211023700000000	756976600000000	533599100000000	841560200000000	887491200000000	12128300000000	608634000000000	491412800000000	779015200000000	940879000000000	235998200000000	764665500000000	18902310000000	214885500000000	536864000000000	844835100000000	225327200000000
K00427	1	0	2	0	0	6	0	0	0	45	364106800000000	83620180000000	1	2	1	4	0	351631000000000	3	2	0	6	2	11759290000000	0	0	2	8	5	744462400000000	218274400000000	139626000000000	780137300000000	123609700000000	889448100000000	115566900000000	142226500000000	106144100000000	118766300000000	129343300000000	121554000000000	13853720000000	15426790000000	525371300000000	955990800000000	111855100000000	142236200000000	876400000000000	103111000000000
K00428	5126891000000	328399800000000	303203900000000	522204600000000	308743100000000	497259400000000	16971920000000	46116820000000	488650300000000	297799800000000	257211500000000	281585100000000	231047500000000	213866900000000	405831800000000	3998776000000	242667900000000	324373900000000	591477800000000	296510700000000	293889700000000	325693200000000	272304300000000	255611400000000	343736800000000	245319800000000	312711600000000	255998900000000	222561900000000	249063000000000	180472800000000	149149100000000	112263100000000	11147030000000	473630400000000	107050200000000	454971800000000	54016360000000	215	207143500000000	153640600000000	212256300000000	109251000000000	362968900000000	814453900000000	185260000000000	467405500000000	950661400000000	137155200000000
K00432	11785110000000	238861600000000	261919900000000	234473800000000	55	85	15	884730600000000	830314300000000	65	155	185	643966200000000	489454900000000	447785500000000	55	161248300000000	16	123296400000000	587568000000000	629780500000000	16	213961900000000	143333300000000	506508200000000	449097200000000	474526400000000	65	103994900000000	933333300000000	143948700000000	615567200000000	3976334000000	985753400000000	97803260000000	14096550000000	158977100000000	406340400000000	186442700000000	105271700000000	198537700000000	217979600000000	473023100000000	97390370000000	356884200000000	736842500000000	105	342933700000000	534672400000000
K00433	793528100000000	696304700000000	349086400000000	302275100000000	6	216666700000000	537510500000000	865641500000000	898128400000000	236941100000000	176227700000000	150745700000000	739335600000000	412731500000000	799303700000000	141112400000000	120476700000000	180250800000000	102814200000000	766587000000000	50137380000000	317855300000000	180501700000000	140290100000000	577685700000	384149500000000	542346300000000	215	117706600000000	20585250000000	941098500000000	393949300000000	24	149604900000000	910935400000000	147918600000000	116808500000000	124936600000000	7	528037100000000	6	208574900000000	132619300000000	35	4	125810200000000	593818000000000	7	316463400000000
K00436	891720900000000	50564010000000	594711000000000	627314000000000	360759100000000	238333300000000	572063400000000	951326900000000	716712900000000	795925700000000	582214500000000	507085200000000	118380200000000	978679600000000	678318500000000	876401800000000	126936600000000	652398900000000	121218000000000	611036000000000	571009000000000	643104900000000	116167400000000	831594000000000	661195400000000	320201400000000	625172400000000	643385400000000	656295200000000	57020520000000	223956700000000	13	191847200000000	85	6	16	4	766666700000000	2	126733200000000	58936170000000	775560400000000	26487320000000	433333300000000	333333300000000	268156200000000	905536000000000	246068400000000	170230500000000
K00437	21400850000000	56003510000000	827686500000000	109776500000000	268031100000000	416097300000000	215835300000000	193581900000000	156192900000000	198799700000000	938220000000000	110211900000000	15236670000000	149003900000000	126959700000000	207833800000000	172804300000000	153540500000000	200851200000000	105584200000000	112083100000000	153422000000000	248084200000000	217547700000000	870229900000000	760748100000000	124051400000000	226175000000000	126159600000000	159135100000000	30	39549150000000	32142960000000	37609720000000	228524700000000	337716300000000	113009100000000	131666700000000	85	24605240000000	105	139746900000000	34	983333300000000	20	641965200000000	334521300000000	337801000000000	390327300000000
K00440	5	29831880000000	0	0	2	0	5	4	7	3	9	139778400000000	328014200000000	5	5	12	973148100000000	7	919444400000000	2	128014200000000	421439600000000	10	1	549313400000000	1	4	6	2	10	0	1	0	0	0	0	0	1	2	0	0	0	0	1	0	0	0	0	0
K00441	274770300000000	137086300000000	111648700000000	103756800000000	562200600000000	647780200000000	540845100000000	248253100000000	259497000000000	148419800000000	12935860000000	157671100000000	133765000000000	964162600000000	167914200000000	137033900000000	993294400000000	129200500000000	308238300000000	173152100000000	170810500000000	151505100000000	164144400000000	139462600000000	184734300000000	138994000000000	15662060000000	14526410000000	148650400000000	160295200000000	3910859000000	488881700000000	336305000000000	132125400000000	787206200000000	109170800000000	600977800000000	110330500000000	43	23561370000000	394194200000000	405833600000000	383259200000000	104422500000000	217487700000000	406047800000000	86338260000000	139442600000000	354265700000000
K00442	58898900000000	583482300000000	8	1	238925900000000	645381900000000	415592500000000	795012000000000	26883260000000	723743900000000	429891500000000	453067800000000	790567400000000	86944340000000	773394000000000	109706200000000	779250200000000	661390800000000	631112300000000	321132700000000	252894800000000	403337000000000	106658000000000	489617200000000	24870920000000	187621100000000	176137200000000	893150700000000	536477100000000	773204500000000	271667800000000	152065200000000	12095860000000	65	1	1	245996800000000	581645600000000	7	586394600000000	664444000000000	231666700000000	15126160000000	25	13	416244200000000	533333300000000	4	7
K00443	134047600000000	283375000000000	0	0	775594700000000	0	375594700000000	561013400000000	9	451208600000000	534746800000000	643443600000000	764373000000000	3	122373600000000	104792900000000	986152900000000	17	5	134047600000000	201598600000000	628560400000000	967545400000000	6	497298400000000	301598600000000	1	657812100000000	5	567373400000000	0	5	0	0	0	0	0	5	1	0	0	0	2	0	5	5	0	0	2
K00448	2	25	0	0	446689900000000	385353500000000	0	0	2	622597000000000	5	5	2	0	1	15	5	1	5	0	1	262222200000000	15	462661100000000	0	1	0	861654100000000	4	5	499730900000000	221793300000000	659224200000000	0	5	145953500000000	122506800000000	356912400000000	574735200000000	294597000000000	569291600000000	147891400000000	0	0	0	833333300000000	3	333333300000000	720994500000000
K00449	0	0	0	0	0	0	0	0	0	0	0	0	0	0	0	0	0	0	0	0	0	0	0	0	1	0	0	0	0	0	917001700000000	16789700000000	119176600000000	0	0	554046500000000	774931700000000	543087600000000	325264800000000	822932900000000	72892600000000	112108600000000	0	1	2	5	0	2	100883000000000
K00450	265923100000000	190239200000000	8	4	0	186125700000000	1	128609600000000	194017200000000	5	436125700000000	3	553076900000000	3	140060000000000	2	5	3	179535600000000	791673200000000	144913800000000	2	291479800000000	0	150634600000000	842990700000000	11835800000000	45	55	8	300797200000000	203755500000000	114479700000000	0	3	356909500000000	141329400000000	934989300000000	131509600000000	0	0	1	207313900000000	586080700000000	653553700000000	1	0	5	118603300000000
K00451	0	0	0	0	0	0	0	0	0	0	0	5	0	0	0	0	0	0	1	2	0	0	0	0	0	0	0	0	0	0	32732970000000	105269800000000	966666700000000	0	0	0	0	642857100000000	0	0	0	0	0	0	0	0	0	0	35531480000000
K00453	0	0	0	0	0	0	0	0	0	0	0	0	0	0	0	0	0	0	0	0	0	0	0	0	0	0	0	0	0	0	48929890000000	1332	369230800000000	0	0	0	4	5	0	0	0	0	0	0	0	0	0	0	2
K00455	5	0	0	0	0	0	0	0	0	1	0	0	0	1	0	0	0	0	0	0	0	0	0	0	0	0	0	0	0	0	878204700000000	237633800000000	89347950000000	23630290000000	0	27260580000000	110111300000000	147780200000000	759735200000000	115980400000000	415917900000000	61870330000000	3	2	0	2	5	3	554063000000000
K00456	0	0	0	0	0	0	0	0	0	0	0	0	0	0	0	0	0	0	0	0	0	0	0	0	0	0	0	0	0	0	491628400000000	576221900000000	2	0	0	0	291060100000000	1	0	0	0	0	0	0	0	0	0	0	738063900000000
K00457	431789200000000	188545600000000	422731700000000	249471900000000	0	288711200000000	200863600000000	324496200000000	195810900000000	174078700000000	187640600000000	198287600000000	329792300000000	150998500000000	415310700000000	340217700000000	256351800000000	3225082000000	493220000000000	427449800000000	145353000000000	362914600000000	37414510000000	294863200000000	212637400000000	165194800000000	197887800000000	282605000000000	198690200000000	223594900000000	234202900000000	712502000000000	486059200000000	15	3	85	285567200000000	357788800000000	20	120083100000000	139480400000000	257645700000000	104401700000000	15	15	1	1	433333300000000	386955400000000
K00459	292252800000000	804481900000000	963863400000000	974140800000000	297300200000000	465031100000000	33077880000000	270170400000000	227726200000000	902871900000000	734306500000000	761520000000000	132724500000000	119787600000000	150613400000000	92032230000000	748502600000000	772454700000000	28973290000000	157055200000000	131602000000000	876760000000000	109066000000000	907403200000000	151795300000000	123188100000000	172435900000000	862392300000000	812521200000000	848451000000000	510138900000000	484942500000000	260380400000000	131210300000000	854078900000000	128274800000000	548674800000000	112058700000000	494876100000000	234838400000000	240974100000000	46085770000000	298959900000000	853954500000000	177395000000000	443960300000000	120319300000000	157173800000000	289445800000000
K00466	0	0	0	2	0	0	0	2	1	0	0	0	0	0	1	0	0	0	0	0	0	0	0	0	0	0	1	0	0	0	0	0	0	0	0	0	0	0	0	0	0	0	0	0	1	0	0	0	0
K00467	146656700000000	418724700000000	0	0	137296300000000	0	13	5	3	116954400000000	10	158436800000000	107888700000000	10	22	207244700000000	235523400000000	168691600000000	952541800000000	8	3	17	8	13	7	8	7	127888700000000	6	9	5	0	2	0	0	0	0	1	0	0	1	0	5	1	0	3	2	0	0
K00471	0	0	0	0	0	0	0	0	0	0	0	0	0	0	0	0	0	0	0	0	0	0	0	0	0	0	0	0	0	0	278984200000000	856108600000000	2	0	0	0	15	292022300000000	0	0	0	0	0	0	0	0	0	0	0
K00477	0	0	0	0	0	0	0	0	0	0	0	0	0	0	0	0	0	0	0	0	0	0	0	0	0	0	0	0	0	0	1	0	1	0	0	0	355009600000000	666666700000000	0	389243200000000	100102300000000	140313500000000	0	1	0	0	2	333333300000000	5
K00479	0	0	0	0	0	0	0	0	0	0	0	0	0	0	0	0	0	0	0	0	0	0	0	0	0	0	0	0	0	0	944446600000000	15	3	0	0	0	8	11	2	0	0	0	0	0	0	0	0	0	10
K00481	0	0	0	0	0	0	0	0	0	0	0	0	0	0	0	0	0	0	0	0	0	0	0	0	0	0	0	0	0	0	120664700000000	405152500000000	183545900000000	0	0	4	156200800000000	153904800000000	9	911596200000000	100240300000000	222945700000000	333557000000000	0	2	0	1	0	111220000000000
K00483	459737800000000	4	422982800000000	32	15	100081300000000	587016200000000	372989800000000	320081300000000	292662500000000	222638100000000	3496734000000	132335600000000	15	17	519259600000000	315232200000000	340005900000000	356818800000000	225	223990900000000	235477300000000	312848500000000	24843140000000	22970040000000	222814000000000	219648900000000	296045300000000	347302700000000	333740100000000	187929400000000	566380800000000	22	466155800000000	328088000000000	48	247870300000000	285754100000000	11	6	174483900000000	177111200000000	900813000000000	4	55	491136500000000	18	318744600000000	43753040000000
K00484	571056700000000	153656200000000	261273400000000	164309800000000	94493180000000	228861800000000	134475700000000	593836400000000	536906500000000	307629600000000	310012400000000	32527430000000	275946100000000	194335600000000	356285200000000	303432500000000	247989500000000	293532000000000	70826880000000	376676700000000	396896800000000	304217700000000	296283800000000	29091070000000	445100700000000	30851470000000	348972100000000	257203600000000	27657740000000	343039500000000	123963800000000	133530200000000	101554300000000	362843800000000	265942000000000	566909500000000	211711200000000	537714300000000	198487200000000	144774400000000	198784600000000	32919540000000	118369700000000	411274700000000	123745400000000	15164420000000	254062100000000	466607100000000	145065800000000
K00491	137448900000000	241035300000000	216159100000000	551765600000000	246189600000000	741379500000000	258646300000000	1248603000000	128489100000000	169970400000000	191223600000000	139479100000000	132722900000000	119721000000000	862962200000000	101524600000000	828330100000000	624864500000000	124130900000000	75706000000000	661866500000000	17498910000000	213120500000000	190567800000000	769557700000000	786186400000000	924202800000000	142243500000000	149563400000000	205449000000000	107587900000000	132993700000000	144763300000000	688367100000000	488259600000000	681312400000000	388118800000000	722758300000000	272738200000000	581849200000000	107445400000000	138069000000000	168894700000000	579608200000000	143290100000000	180163900000000	328097200000000	546712100000000	185150500000000
K00496	115328600000000	386867400000000	115992000000000	189067900000000	151379000000000	36625	981648900000000	134790100000000	158495200000000	631542200000000	137439100000000	336319600000000	6	2	15	136534700000000	102218900000000	589353800000000	726828300000000	35	127669800000000	102609800000000	261193800000000	961238100000000	71964210000000	55	5	535600200000000	393132900000000	143495800000000	776363300000000	24461570000000	15	1	5	2	53824190000000	196889600000000	3	1	0	2	520661200000000	5	4	4	3	5	138908100000000
K00500	0	0	0	0	0	0	0	0	0	0	0	0	0	0	0	0	0	0	0	0	0	0	0	0	0	0	0	0	0	0	384289600000000	4	7	0	0	0	228337900000000	4	0	0	0	0	0	0	0	0	0	0	428327600000000
K00504	2	4	0	0	0	4	0	1	0	3	4	0	0	0	0	0	0	0	2	2	1	2	5	1	0	0	2	4	2	0	286304900000000	25881450000000	13	2	0	2	0	0	0	0	0	0	1	0	1	9	3	7	14
K00505	315272600000000	33348710000000	833227000000000	420510800000000	634792100000000	370197500000000	153738800000000	319694400000000	296013700000000	125260200000000	11217150000000	14651410000000	426530500000000	759670100000000	166444000000000	684051600000000	261749200000000	602063200000000	353958700000000	26286010000000	251666500000000	115839200000000	11783330000000	109509400000000	250721000000000	156288000000000	165684700000000	985158200000000	105775100000000	116885900000000	143879500000000	346452300000000	885459300000000	137274400000000	1	35	1	0	0	0	0	0	840775600000000	428375200000000	1	554306400000000	0	0	832619900000000
K00507	15	0	3	0	0	7	0	116053900000000	28402310000000	1	2	0	1	1	1	1	0	0	17	7	0	25	5	4	9	960744500000000	5	5	1	4	121695900000000	617754000000000	542896400000000	225104700000000	154719600000000	15	224000800000000	356970900000000	204261900000000	0	3	8	750366900000000	182476900000000	619911600000000	833734700000000	18	216428700000000	599571500000000
K00508	69835640000000	271306300000000	523426000000000	396594900000000	2	180891300000000	2	566039800000000	702282100000000	23372820000000	242033500000000	252601000000000	26387080000000	104236100000000	595469000000000	286056300000000	20270070000000	146421300000000	735356700000000	458472500000000	413851100000000	378316100000000	222942500000000	295854700000000	436747900000000	322834900000000	397461300000000	273447600000000	183814000000000	284042700000000	132800100000000	867931600000000	46662140000000	15	3	1	761790600000000	645692000000000	72613220000000	1	1	1	782750200000000	251371500000000	566687600000000	138289600000000	45	352823600000000	679466200000000
K00520	118292100000000	632019100000000	903762700000000	435750600000000	226719200000000	985358200000000	482153600000000	116807300000000	865099200000000	810466500000000	732092800000000	656298000000000	170931200000000	114504600000000	109530900000000	139869300000000	746230500000000	859708600000000	102454500000000	630892700000000	440052400000000	662203300000000	131612500000000	757389200000000	520474700000000	536998100000000	654296100000000	120284100000000	769929200000000	941261500000000	274920700000000	364014100000000	349790700000000	182243900000000	124830000000000	192270500000000	171346100000000	192202300000000	138034000000000	701522800000000	728675500000000	846231600000000	454756800000000	127571800000000	354797800000000	660631000000000	173951700000000	232755800000000	426209600000000
K00523	4	875099800000000	0	918606200000000	0	4	0	4	1	5	1	8	55	111316000000000	7	2	1	0	3	4	15	3	85	2	1	1	43457250000000	3	2	1	265005400000000	685340400000000	410855600000000	0	1	1	312391600000000	380998600000000	140825800000000	168263400000000	380545100000000	234541000000000	432849400000000	2	3	25	0	2	252621900000000
K00525	466678900000000	194860800000000	161184800000000	175837600000000	730371700000000	135256100000000	143896100000000	449725300000000	406044100000000	229071900000000	187428000000000	178840000000000	412897100000000	30906810000000	290103000000000	266654000000000	204526600000000	196341900000000	496580100000000	277085200000000	233215000000000	21587720000000	304447600000000	225844900000000	235006500000000	196438100000000	290598100000000	249862200000000	194886900000000	216613200000000	147507000000000	128786300000000	999336300000000	388162300000000	263419200000000	462073100000000	367293700000000	528619100000000	261659000000000	121523900000000	167845300000000	212440000000000	120019300000000	356648400000000	781595600000000	136707200000000	330652000000000	485384400000000	112961800000000
K00526	100236100000000	569224800000000	258812000000000	899403900000000	164296500000000	380560600000000	356858800000000	920612000000000	821660900000000	497521800000000	418336900000000	452840400000000	100664000000000	546133500000000	746807800000000	608049000000000	50106230000000	455598800000000	929526000000000	641815000000000	467305900000000	54186930000000	732298000000000	587312800000000	522336200000000	476421400000000	661826100000000	524743500000000	431818700000000	462843600000000	34111320000000	353353700000000	25593870000000	113107000000000	71229910000000	126069500000000	830301700000000	114084000000000	662653100000000	434031300000000	843607000000000	906339500000000	317111400000000	883882100000000	191579400000000	288585100000000	837781700000000	114883900000000	310741400000000
K00528	510898400000000	214868700000000	251425300000000	139547900000000	850708000000000	276591100000000	144232000000000	491446500000000	418917300000000	301964000000000	260157700000000	238300600000000	467163400000000	364481100000000	361752000000000	414640500000000	280034700000000	294188900000000	49425510000000	279478100000000	236102300000000	255106700000000	408503000000000	284256100000000	258776700000000	220168300000000	307524800000000	353671200000000	269982800000000	305576200000000	108026600000000	107136300000000	744323900000000	341685200000000	236510200000000	426594200000000	313767800000000	370103900000000	243269000000000	102777500000000	106310500000000	120126800000000	929923400000000	301282400000000	603276300000000	104339200000000	267809700000000	369196800000000	823683600000000
K00529	0	0	0	0	0	0	0	0	0	0	0	0	0	0	0	0	1	0	0	0	0	0	0	0	1	0	0	0	0	0	27462980000000	132388400000000	174357900000000	0	0	0	10354890000000	131733100000000	980831300000000	0	11827030000000	0	24364410000000	5	0	0	0	0	110453200000000
K00532	249545800000000	52495760000000	85809710000000	1546644000000	327049200000000	102376100000000	102303500000000	276501400000000	207434800000000	194877500000000	182976500000000	141449300000000	297572700000000	165630100000000	272369000000000	164401800000000	772721300000000	131675200000000	286907500000000	159805200000000	121244600000000	193168900000000	241813500000000	174013500000000	137094000000000	1328480000000	206889200000000	150358000000000	134141300000000	174871600000000	124522400000000	148554100000000	805363700000000	10478000000000	177099700000000	30	11	298355600000000	25	3	15	2	641710000000000	809689800000000	402521400000000	408766600000000	283306800000000	161645900000000	740492600000000
K00533	560942800000000	106512700000000	192249500000000	117272600000000	455378300000000	111734400000000	106212900000000	539741100000000	479391000000000	220880200000000	174928400000000	172610800000000	236293900000000	228769900000000	279180000000000	187145400000000	136622500000000	149823200000000	571023600000000	320613600000000	270906300000000	219669500000000	253032500000000	226878100000000	299220400000000	239160800000000	333255000000000	217760900000000	164749100000000	209627300000000	651626900000000	834743100000000	616250300000000	314849300000000	216724000000000	341909500000000	166860500000000	252204600000000	110463800000000	522867100000000	557162500000000	716881600000000	649587500000000	22209760000000	452469600000000	78774740000000	243258300000000	291522300000000	714127200000000
K00534	30142530000000	0	1	1	5	35	0	135	149451900000000	233333300000000	4	35	433333300000000	3	414005200000000	15	1	1	100918100000000	8	11797370000000	25	118147200000000	4	19	3	10155560000000	932853000000000	75	105	686437200000000	739008900000000	460679900000000	10548690000000	3	55	4	7	5	5	15	0	195996300000000	290201000000000	5	162097300000000	929121600000000	5	301114900000000
K00537	118086800000000	397855500000000	481052400000000	458377400000000	282925700000000	470268700000000	29876860000000	114598700000000	103191900000000	6035653000000	513844700000000	512075900000000	992688300000000	710760700000000	893609600000000	818304300000000	605806700000000	667496200000000	138003400000000	640310500000000	638922400000000	593886400000000	751978500000000	521341300000000	766818900000000	532644200000000	718106900000000	637052600000000	552010400000000	600440400000000	204135300000000	207803200000000	75192440000000	437922100000000	364875900000000	543653800000000	302015900000000	510728500000000	259536800000000	339793900000000	332039900000000	568529300000000	992103500000000	351508100000000	567390800000000	249190500000000	482267000000000	807248800000000	120584100000000
K00543	0	0	0	0	0	2	0	0	0	0	0	0	0	0	0	0	0	0	0	0	0	0	5	1	0	0	0	0	0	1	608565600000000	914964400000000	333642300000000	0	0	0	140333300000000	605954500000000	0	0	0	0	0	0	0	333333300000000	0	0	1
K00544	94124480000000	260437400000000	322103100000000	688504300000000	281601600000000	265986800000000	378807600000000	805446800000000	6571147000000	446502800000000	362084400000000	347727100000000	10397510000000	523312600000000	710062700000000	441641000000000	405325800000000	291296400000000	111697000000000	519083200000000	421382800000000	408048300000000	684670700000000	397885500000000	417046500000000	304792200000000	567189100000000	477559800000000	366845400000000	292235000000000	10	113333300000000	795641000000000	133333300000000	3	35	1	2	45	0	1	15	849032300000000	5	316666700000000	166920200000000	10	113333300000000	105004100000000
K00547	214108700000000	929289300000000	412806800000000	402844800000000	228545500000000	451871400000000	584446600000000	209411700000000	179005000000000	103179700000000	78795570000000	753074900000000	1619248000000	118980100000000	118811500000000	125246000000000	969261100000000	896366900000000	221285500000000	12079080000000	937613800000000	916364000000000	122782900000000	90090700000000	116851600000000	989614100000000	133483300000000	105433500000000	789984700000000	962806500000000	219631300000000	232163100000000	152124800000000	897180700000000	50510780000000	113572000000000	548602100000000	660234700000000	48345180000000	338829200000000	407904300000000	347058800000000	196668600000000	56260810000000	114951900000000	238594900000000	79099560000000	86869750000000	174627300000000
K00548	131069200000000	44990630000000	437891900000000	353558700000000	206857400000000	379799300000000	31181080000000	123935200000000	105185100000000	678909900000000	556708400000000	53463860000000	79505440000000	706364700000000	735730000000000	77340840000000	578001400000000	621286000000000	134037300000000	728561300000000	595386000000000	65623100000000	830613800000000	65111490000000	681829000000000	578402300000000	785797600000000	697171600000000	567052400000000	67349260000000	162602900000000	187183000000000	132978300000000	665434400000000	443086800000000	723374000000000	36256250000000	534103700000000	274173500000000	199351500000000	227680300000000	281116900000000	163710100000000	465729200000000	114330600000000	224649100000000	561500000000000	887085100000000	156342300000000
K00549	188699000000000	896323600000000	120174500000000	566528000000000	254675100000000	134593400000000	628708800000000	178830300000000	157493400000000	136725300000000	113878000000000	105636100000000	216462200000000	16521920000000	162106100000000	180072300000000	102261300000000	122892100000000	169323300000000	956450200000000	916223800000000	101779500000000	18754910000000	120863100000000	108932300000000	902387600000000	110432400000000	1709055000000	118931500000000	141361800000000	360771400000000	325587300000000	1632883000000	146111100000000	565694500000000	124737500000000	157785800000000	122566100000000	109017400000000	111889400000000	833976100000000	153527900000000	253938500000000	561175100000000	110003000000000	328140200000000	905535100000000	128775000000000	153478500000000
K00554	659514000000000	236666100000000	263233000000000	200169200000000	929128800000000	233572900000000	171567600000000	611369200000000	534974600000000	346857300000000	294364700000000	268625100000000	50495580000000	406118800000000	409755000000000	413586500000000	305847700000000	311928400000000	674123000000000	365086400000000	315034600000000	31730760000000	460969200000000	33923650000000	353976400000000	27914090000000	399338800000000	38716090000000	306726200000000	350106300000000	697724200000000	936838400000000	620571000000000	304767600000000	186971500000000	322187500000000	171825600000000	239804100000000	151281900000000	767186700000000	814141700000000	1150858000000	760442900000000	192897600000000	404530300000000	117036500000000	290721900000000	441380000000000	644442300000000
K00555	1	4	0	0	0	0	1	0	4	2	5	2	6	1	4	1	4	1	2	0	1	2	2	1	2	0	0	0	3	0	0	0	0	0	1	0	0	0	0	0	0	0	0	0	0	1	0	0	0
K00556	609477600000000	357744100000000	514070100000000	155495100000000	116069100000000	497256000000000	259261100000000	556072300000000	454918500000000	377470500000000	314115500000000	254689700000000	849645900000000	652617400000000	513825200000000	702749600000000	398459000000000	331092500000000	592870900000000	324262800000000	209572500000000	309025200000000	635109000000000	354233600000000	276998600000000	254717500000000	394504900000000	544444100000000	366462300000000	399594200000000	149431800000000	161534900000000	116230200000000	348050200000000	212543600000000	386334200000000	731284700000000	465458100000000	493921700000000	357322100000000	261925600000000	452213700000000	119963000000000	312951400000000	579472800000000	111161700000000	417719500000000	541117800000000	136615600000000
K00557	10709260000000	532142100000000	78517270000000	283577800000000	230700900000000	994277300000000	474044100000000	122418000000000	817344400000000	897839200000000	704429900000000	760741600000000	182347400000000	160598700000000	100138200000000	148609500000000	101897400000000	100282100000000	919208400000000	503945900000000	362433100000000	618613600000000	144520900000000	854526300000000	556587400000000	488970300000000	641621000000000	129090900000000	834843000000000	863427800000000	217887600000000	168946100000000	782683600000000	54088500000000	279604800000000	677082700000000	869699800000000	656318100000000	79299920000000	643619500000000	440555900000000	402076600000000	106176200000000	40692920000000	35542900000000	194286000000000	634466400000000	842638200000000	829435400000000
K00558	111190100000000	345185300000000	557005900000000	392552300000000	1766104000000	475921400000000	37341050000000	107513600000000	94814840000000	631973100000000	51047360000000	48880640000000	732296300000000	534012900000000	742764500000000	764789400000000	482057200000000	61803920000000	114823400000000	625528900000000	571904600000000	648972100000000	805892200000000	657962600000000	646555800000000	492738500000000	666308400000000	687606500000000	53154580000000	63938280000000	189455400000000	218486200000000	105176900000000	616060200000000	378912500000000	655484000000000	672831100000000	708256900000000	534738500000000	259611800000000	342820700000000	399780500000000	132740100000000	397352800000000	864521800000000	184108300000000	599222800000000	839899500000000	130834200000000
K00560	592018900000000	234513100000000	328289300000000	222741500000000	11178870000000	257112200000000	163841400000000	576996500000000	470823700000000	324441500000000	267663800000000	269650300000000	529549700000000	381400200000000	420499300000000	422302600000000	289535600000000	313197100000000	558761100000000	305977500000000	275346200000000	275262000000000	400841500000000	293254400000000	310518300000000	271957200000000	340648300000000	360043300000000	289121100000000	339570900000000	100001300000000	106563300000000	701590400000000	287888200000000	146959100000000	332071000000000	257831800000000	27704230000000	173335700000000	825951400000000	115857700000000	144024200000000	969180500000000	292426500000000	582045300000000	111674300000000	26991320000000	423429800000000	843324200000000
K00561	101767800000000	508012000000000	749048800000000	273988500000000	246866900000000	835967100000000	498036200000000	110680200000000	887163800000000	842453100000000	694830800000000	713565400000000	171046000000000	140766100000000	106405700000000	145411000000000	939057600000000	920434700000000	8980717000000	520993600000000	409287000000000	623505300000000	132317300000000	813398200000000	477226600000000	488055000000000	630322800000000	118248000000000	761245600000000	955082100000000	947222600000000	122081000000000	505634800000000	463527700000000	325384000000000	701196000000000	808749000000000	528693400000000	571837200000000	299602000000000	181256800000000	379815100000000	123253000000000	289955800000	408971000000000	23395040000000	588368900000000	969039100000000	982707200000000
K00563	135599000000000	590547300000000	601121600000000	280879000000000	221631500000000	418468500000000	437473600000000	128146800000000	104786400000000	655943400000000	531270300000000	438301300000000	154297400000000	990398800000000	980156500000000	775054300000000	691208800000000	669531300000000	14664950000000	757267400000000	613123100000000	59602490000000	880031400000000	679543200000000	673553000000000	585895300000000	866352900000000	803226200000000	599155900000000	638221500000000	248139500000000	198695500000000	999686700000000	635857200000000	300181000000000	634791400000000	331806100000000	434239200000000	191900900000000	207977000000000	152195900000000	248576700000000	160598600000000	39184430000000	764167500000000	159128300000000	624389700000000	573961500000000	131274200000000
K00564	218775100000000	716475300000000	116481400000000	832764100000000	376877700000000	611320300000000	585094300000000	207282400000000	190758100000000	129558500000000	101863200000000	102625200000000	129779100000000	112597600000000	158293200000000	126919500000000	791362800000000	999779900000000	217591100000000	128361400000000	108480300000000	11895160000000	149933200000000	120201700000000	135276700000000	953266900000000	127127100000000	120141900000000	102655200000000	117609300000000	307408300000000	291404200000000	922764800000000	607042100000000	348369800000000	780730400000000	637870900000000	792655600000000	305100100000000	437426300000000	399111700000000	678440400000000	137683900000000	316778800000000	669157000000000	239071900000000	960158700000000	120066300000000	142553400000000
K00566	492009200000000	154001200000000	188354100000000	147727400000000	739532000000000	156666000000000	128668400000000	465275800000000	407197800000000	251899800000000	200430500000000	203395300000000	308569700000000	256968800000000	272132500000000	266968400000000	207969000000000	223848000000000	509310700000000	285819400000000	239298600000000	23448260000000	30350380000000	229615000000000	258172100000000	216653000000000	298925300000000	251771600000000	197864300000000	227652800000000	774888500000000	905159900000000	718290500000000	350562000000000	248683800000000	402997300000000	163667600000000	276441100000000	137760500000000	704034700000000	107442700000000	110408000000000	827482600000000	238761000000000	611948400000000	103042900000000	283781300000000	424740600000000	914351800000000
K00567	262712200000000	943281800000000	111288400000000	954060600000000	520137100000000	836766200000000	103407600000000	255864500000000	218204800000000	170486600000000	135805800000000	128133000000000	246250000000000	171703300000000	181079000000000	187833800000000	135403500000000	15141910000000	282736800000000	170708000000000	132106200000000	157719500000000	225389500000000	169019300000000	143801300000000	126150900000000	165201100000000	190008900000000	143178300000000	15629080000000	619283900000000	617324600000000	347079900000000	171614600000000	112259800000000	217581400000000	125743400000000	167043100000000	993151700000000	816403900000000	888310500000000	122016500000000	465063100000000	131429800000000	251710500000000	570100600000000	152128800000000	252901500000000	428747400000000
K00568	238103900000000	145185100000000	137839700000000	130021000000000	666693100000000	167392900000000	415908500000000	285462900000000	195297100000000	123950700000000	128667600000000	108385200000000	279210000000000	196130200000000	145665500000000	231987200000000	133134300000000	163919000000000	202636700000000	107601100000000	100457100000000	112842000000000	170565800000000	144286100000000	147174500000000	114507600000000	113587000000000	194550900000000	119435000000000	144145600000000	268917100000000	187585700000000	149913600000000	538240400000000	346627700000000	584843900000000	748920600000000	951819400000000	524562400000000	75	122611400000000	350635300000000	129394100000000	547875900000000	933118100000000	137115300000000	18	298774100000000	194903400000000
K00569	0	0	0	0	0	0	0	0	0	0	0	0	0	0	0	0	0	0	0	0	0	0	0	0	0	0	0	0	0	0	197599800000000	5	1	0	0	0	630560900000000	217669200000000	0	0	0	0	0	1	0	0	0	0	2
K00570	2	1	0	0	0	0	0	0	0	0	0	0	0	0	0	0	0	0	1	0	0	0	0	0	0	0	5	5	0	0	232588500000000	4	0	0	0	0	370593000000000	0	3	1	0	0	0	0	1	0	0	0	0
K00571	885395700000000	256825000000000	366491000000000	288313400000000	11719720000000	235182200000000	235722300000000	811528900000000	722243900000000	408972600000000	341423900000000	338244700000000	487535000000000	380942800000000	528764400000000	420892500000000	266014400000000	346382100000000	867735400000000	517468300000000	426823400000000	410038400000000	496604800000000	411523900000000	50512950000000	388485300000000	541672000000000	417439700000000	33825970000000	408612900000000	134855900000000	158349200000000	951169400000000	511509700000000	31113760000000	531494700000000	264522500000000	39112900000	173304400000000	179848500000000	225711300000000	273340000000000	118611700000000	318206100000000	721423600000000	145708300000000	399692900000000	547444500000000	114865000000000
K00573	589945900000000	326257000000000	526559900000000	2	6	302976500000000	877282400000000	794234300000000	695833000000000	239915300000000	218434800000000	362696500000000	226854400000000	192562800000000	791160600000000	162810700000000	255149500000000	122339300000000	79671960000000	494251000000000	360980000000000	429711600000000	361793300000000	306926000000000	452126200000000	472748800000000	61944250000000	19886710000000	137987900000000	259779700000000	110390100000000	65444600000000	513215000000000	684925500000000	523472700000000	709203400000000	635562600000000	431272800000000	674585200000000	76847230000000	781768000000000	943035400000000	626829000000000	255385900000000	308428700000000	32225320000000	845026300000000	446381000000000	501815500000000
K00574	729610500000000	355159200000000	319138800000000	498833300000000	300670000000000	108440500000000	236115400000000	583456200000000	613286200000000	420491200000000	395752000000000	416263900000000	491759900000000	440026700000000	548243400000000	57379730000000	503827400000000	432127100000000	618771800000000	416492900000000	359084400000000	464239200000000	556555600000000	41007150000000	396340700000000	352203400000000	366017200000000	468228000000000	365397200000000	416456900000000	256862500000000	215878900000000	902662700000000	3137627000000	136423000000000	296475100000000	81241250000000	63768430000000	675225900000000	46664710000000	588300000000000	828380700000000	108951800000000	31	61278810000000	191074500000000	546788500000000	10054450000000	101146800000000
K00575	338849800000000	781696900000000	300731400000000	1880476000000	953284600000000	868641100000000	907916500000000	325145400000000	310709800000000	19295850000000	154656400000000	144103400000000	185814900000000	148097900000000	301114900000000	165023900000000	919752000000000	143128200000000	394160400000000	232336800000000	189105600000000	196933400000000	235466100000000	221618500000000	209722500000000	160929300000000	214610400000000	206611300000000	14640380000000	196000000000000	598805900000000	660291300000000	244338700000000	105742100000000	525492200000000	168307500000000	563923600000000	816638100000000	245	10	11	12	286495800000000	894933100000000	180605600000000	287175100000000	106289400000000	139491500000000	274063600000000
K00577	5	938594300000000	0	0	4	0	5	0	136184200000000	1	0	3	2	5	356655100000000	1	45	3	2	3	0	183333300000000	2	436184200000000	115896000000000	4	0	0	3	1	0	1	0	0	0	0	0	0	0	0	0	0	0	0	1	0	0	0	1
K00578	1	0	0	0	0	0	5	0	263815800000000	19018300000000	19018300000000	0	0	5	0	331059700000000	5	0	2496337000000	0	255193500000000	116666700000000	3	219009300000000	578756900000000	0	371128600000000	5	0	1	0	0	1	0	0	0	0	0	0	0	0	0	1	0	0	0	5	5	0
K00579	5	220519100000000	0	0	952664000000000	0	446336600000000	2	0	40981700000000	40981700000000	5	4	672148000000000	174334500000000	105013400000000	746336600000000	863328800000000	5503663000000	1	444806500000000	3	2	244806500000000	5828948000000	2	328871400000000	5	4	1	1	0	1	0	5	1	0	0	0	0	0	0	1	0	0	0	5	5	0
K00580	2	163132700000000	0	0	768878300000000	0	253663400000000	4	3	365022400000000	342647100000000	1	5	127852000000000	365022400000000	229493400000000	664350400000000	336671200000000	1	0	155343500000000	5	345241800000000	1	122452400000000	0	2	255343500000000	3	2	0	0	0	0	5	1	0	0	0	0	0	1	0	0	0	2	0	0	0
K00581	3	874887900000000	0	0	478457700000000	0	0	0	5	234977600000000	557352900000000	5	4	1	234977600000000	189313000000000	589313000000000	3	1	5	144656500000000	2	354758200000000	1	3	1	0	144656500000000	1	0	0	0	0	0	0	0	0	0	0	0	0	0	0	0	0	0	0	0	0
K00582	0	5	0	0	3	0	0	5	0	147568400000000	0	1	1	0	0	3	0	0	0	0	0	0	0	0	0	0	0	0	1	2	0	0	0	0	0	0	0	0	0	0	0	0	0	0	0	0	0	0	0
K00583	0	0	0	0	0	0	0	5	0	0	0	1	0	0	0	0	0	0	0	1	0	0	0	0	0	0	0	0	0	0	0	0	0	0	0	0	0	0	0	0	0	0	0	0	0	0	0	0	0
K00584	18	647092800000000	3	813522200000000	18	1	17	350921000000000	194138100000000	155901900000000	20	861221400000000	13	842899300000000	30314660000000	24	18	344319200000000	243473300000000	15	17	107503200000000	243110300000000	8	18	13	9	17	12	124143800000000	0	0	1	0	0	0	2	0	0	0	1	2	1	1	0	0	0	2	1
K00588	136850600000000	317848200000000	569963000000000	538587600000000	176003100000000	300849700000000	199295100000000	127715700000000	124456600000000	573722200000000	460231400000000	46914710000000	337714000000000	343642800000000	761319500000000	473465500000	256027200000000	407440800000000	147117700000000	827663200000000	789547700000000	566830500000000	576977500000000	546707900000000	868764000000000	644759800000000	714687800000000	458991300000000	486911600000000	576509300000000	187233900000000	154321000000000	128501800000000	542569000000000	407803900000000	450662900000000	294367100000000	537548100000000	336828100000000	160805300000000	182420700000000	265470200000000	167517600000000	452408100000000	153468800000000	236364100000000	335515000000000	816059200000000	162227000000000
K00590	124421700000000	406622300000000	563189800000000	33319430000000	132677900000000	490705500000000	415979600000000	124013700000000	10868310000000	784647900000000	630443100000000	605813700000000	875601100000000	548237300000000	820906000000000	842927600000000	53297720000000	65769900000000	124775700000000	787551400000000	56103920000000	743487200000000	105964400000000	857400400000000	687264300000000	57983340000000	876362100000000	781630400000000	653077900000000	834812100000000	14420020000000	246499400000000	122160900000000	802226300000000	581627400000000	929384000000000	187272100000000	401469300000000	129573300000000	294077100000000	191984900000000	282204900000000	183818700000000	524552200000000	901402300000000	196755800000000	972945300000000	748127600000000	119381500000000
K00595	498587900000000	1603012000000	199260500000000	172229900000000	765480700000000	111384600000000	106950100000000	478060600000000	440565700000000	22236420000000	183365300000000	173090100000000	283703100000000	283279600000000	306181500000000	244178000000000	233519600000000	192387300000000	565502700000000	302792400000000	254792400000000	216057300000000	276306300000000	216219200000000	281593300000000	224138900000000	298253900000000	230118800000000	196893100000000	21243640000000	560341300000000	698361500000000	463314600000000	137818500000000	632294800000000	17692640000000	885349700000000	15466340000000	59779130000000	442754500000000	574624400000000	78261520000000	572402400000000	146009300000000	376882800000000	826442200000000	165529900000000	279788800000000	499377800000000
K00596	0	0	0	0	0	0	0	0	0	1	0	0	0	0	0	0	0	0	0	1	0	0	2	0	2	0	0	0	0	0	1	0	0	1	0	0	0	0	0	0	0	0	0	0	0	9	2	2	1
K00598	118976100000000	902689600000000	105471000000000	322350400000000	615712800000000	747813800000000	116032900000000	95022260000000	948655200000000	214595600000000	168700000000000	188723700000000	168858900000000	110674600000000	101298900000000	249001100000000	241560700000000	184169300000000	106497500000000	878115800000000	531955800000000	202047300000000	268413600000000	21337550000000	586753500000000	473780100000000	7836399000000	194560900000000	181254500000000	174684800000000	176429200000000	115973500000000	498316700000000	52127330000000	263264800000000	262208400000000	7154439000000	596656600000000	685770300000000	672012300000000	589984600000000	990636400000000	113787100000000	160068600000000	422357300000000	109282700000000	630860500000000	375368100000000	844437100000000
K00600	459348700000000	14513280000000	178119700000000	125519600000000	561097400000000	158277300000000	137019500000000	437973200000000	382675300000000	251718100000000	217756400000000	207848600000000	353705400000000	280446300000000	293345000000000	297580100000000	20745220000000	235999400000000	475708800000000	270159500000000	235574700000000	232204700000000	336955400000000	237275300000000	265546800000000	200291900000000	284308100000000	273689900000000	219486500000000	2617899000000	940004300000000	971563100000000	659905500000000	246972300000000	188179000000000	313965300000000	195399800000000	264204700000000	132059200000000	956753500000000	818186300000000	140023100000000	756087100000000	228690500000000	470299700000000	757303400000000	227376600000000	298117000000000	74728020000000
K00602	544123100000000	210747300000000	235749800000000	1555011000000	844752500000000	216397100000000	147440900000000	506494100000000	447265800000000	298013100000000	239111700000000	239566400000000	431410300000000	348882400000000	363727700000000	351662100000000	255715500000000	285756600000000	548049300000000	323048000000000	262584800000000	262610600000000	394158800000000	288306000000000	305220200000000	247664900000000	325805600000000	348122000000000	252551400000000	311487500000000	955527400000000	1013423000000	72011750000000	34550330000000	215594900000000	395840300000000	24492350000000	34316950000000	161673200000000	105705800000000	153416000000000	173160300000000	924175400000000	278729900000000	601010300000000	130183300000000	343262000000000	437639800000000	834737400000000
K00603	369113600000000	106113200000000	745179200000000	39996630000000	1	924757800000000	256871700000000	351587300000000	293009900000000	496282100000000	502413100000000	42982370000000	11399420000000	174507200000000	984641100000000	121329600000000	340189500000000	206095200000000	338816200000000	193862000000000	164577000000000	666336100000000	557450200000000	47597840000000	148654400000000	184133500000000	259471100000000	319871600000000	407548100000000	828300800000000	154389300000000	16535190000000	189827400000000	610091400000000	444622200000000	722455200000000	45225380000000	711352600000000	241774000000000	111948100000000	107066800000000	292709200000000	248459800000000	865614100000000	162966500000000	145712400000000	20463970000000	5814021000000	220517400000000
K00604	575157000000000	19315320000000	266506100000000	189991000000000	834156300000000	188064500000000	1607315000000	529376000000000	463343500000000	288231100000000	237158200000000	226373200000000	38922040000000	347102400000000	371304500000000	345997900000000	249635900000000	272816500000000	591148300000000	342807900000000	286059600000000	284365500000000	378595400000000	281537100000000	330981600000000	259193100000000	330593800000000	305711900000000	242021100000000	287881900000000	944200500000000	102331400000000	568070600000000	311761800000000	174925600000000	323997200000000	228686500000000	248121200000000	121137700000000	111386100000000	728062400000000	106549800000000	747942100000000	217870900000000	422511000000000	974111700000000	264529900000000	368623500000000	689332200000000
K00605	753061600000000	232059600000000	205738400000000	206206500000000	34642540000000	159291800000000	169206000000000	716168800000000	627686400000000	212490400000000	166036800000000	205138300000000	569478600000000	477466000000000	455901500000000	200957600000000	140788100000000	195997700000000	778291000000000	491065100000000	462314900000000	232955400000000	272449400000000	23554760000000	392126300000000	394157900000000	548496800000000	243030400000000	183458500000000	224517800000000	582976800000000	442455000000000	31079880000000	847093900000000	658861100000	102143300000000	123528900000000	155879900000000	600264600000000	318111500000000	306777200000000	467475800000000	375371800000000	101204200000000	270059700000000	276157700000000	446034700000000	117326000000000	404127700000000
K00606	131830300000000	322386100000000	518243700000000	300833800000000	127990300000000	269125200000000	194481200000000	124870100000000	117612600000000	505991200000000	454611200000000	41600820000000	318736300000000	378227200000000	549789800000000	317056200000000	202148800000000	305210100000000	124833800000000	753150700000000	707431300000000	543529500000000	495516400000000	482717500000000	785069000000000	628200100000000	684547100000000	453095000000000	396272500000000	49351240000000	335365000000000	309066200000000	249533500000000	106031500000000	476763700000000	114143300000000	760305400000000	916075000000000	551114500000000	274096800000000	45559250000000	78958110000000	247760800000000	899748400000000	190293800000000	325630400000000	744024300000000	145915000000000	292569200000000
K00608	155591100000000	581100400000000	640533700000000	429837400000000	246289000000000	560786500000000	375591600000000	139601200000000	119253200000000	938412000000000	690567200000000	673060600000000	139019800000000	963797000000000	102887900000000	100852100000000	669092600000000	832504800000000	159688500000000	90417590000000	694092400000000	721906900000000	102427200000000	802144200000000	884064500000000	635875500000000	94938900000000	954686000000000	710116500000000	84308720000000	263675700000000	232858600000000	123827400000000	112396500000000	625143700000000	867762400000000	65903250000000	670160100000000	512394200000000	429863600000000	343729000000000	486271500000000	171249100000000	566066600000000	105862300000000	395249100000000	839263600000000	116191700000000	13259340000000
K00609	464593200000000	164436100000000	192969900000000	138499000000000	658151700000000	164447200000000	121174300000000	406866700000000	373426600000000	239568900000000	199453900000000	181625100000000	324330600000000	258554600000000	288641300000000	275213300000000	191033200000000	222346500000000	421593700000000	246628700000000	222426200000000	224776900000000	306362600000000	221010000000000	239229400000000	197454600000000	27559620000000	259853000000000	191033800000000	232837400000000	679980900000000	802946900000000	469172300000000	227973600000000	156820400000000	217622300000000	130485900000000	228869600000000	101790700000000	707244600000000	660631000000000	109203700000000	584728200000000	161625800000000	341726900000000	800170300000000	191426700000000	309182400000000	551619200000000
K00610	977495500000000	29842490000000	400682400000000	346517800000000	122959800000000	317970200000000	226557900000000	888593400000000	830043200000000	545221100000000	419931100000000	426187100000000	749257900000000	47608610000000	709681300000000	547176000000000	33915450000000	455587300000000	111615900000000	66864040000000	472252000000000	460060700000000	574633500000000	504641400000000	662008200000000	439477300000000	669426900000000	549949700000000	461515300000000	48606590000000	111046700000000	148466900000000	745142800000000	619550900000000	250560900000000	480849300000000	379629000000000	361840400000000	349926800000000	129881800000000	168979800000000	212344400000000	109499600000000	385214300000000	657610400000000	161256200000000	448252700000000	366550300000000	988668900000000
K00611	69587550000000	259203500000000	360714900000000	249413300000000	133224400000000	298533300000000	187333400000000	667656200000000	562763100000000	380875100000000	307235700000000	298312900000000	536196500000000	416085800000000	458488500000	475590500000000	29389960000000	362448600000000	686342500000000	380524100000000	327034000000000	333432000000000	46724840000000	359243800000000	38018530000000	298154600000000	415156600000000	426795000000000	326959500000000	368144400000000	242229400000000	224329900000000	127710300000000	136262200000000	651077200000000	106615000000000	118864600000000	870213800000000	106633600000000	926532700000000	976831100000000	120730100000000	174929600000000	528398800000000	118930800000000	191640400000000	121563000000000	103725500000000	161293100000000
K00612	132170500000000	449313800000000	566070600000000	543281900000000	718566100000000	317439000000000	140518500000000	140509700000000	104898400000000	63336260000000	485028100000000	468311100000000	805437000000000	550717600000000	979304700000000	911950100000000	782353800000000	658281600000000	155372500000000	856805200000000	693796600000000	910887900000000	777627300000000	799790800000000	709525500000000	612161400000000	744954900000000	842453600000000	768245400000000	617328100000000	257093300000000	928948500000000	762972300000000	348618100000000	16370470000000	213953300000000	170447500000000	33538820000000	553815300000000	65	705887500000000	716341500000000	530758100000000	151410800000000	571442300000000	516779400000000	325822800000000	183614500000000	109350000000000
K00613	122859900000000	307348300000000	957881900000000	559648400000000	15	247721900000000	322419200000000	109434900000000	863455200000000	426082500000000	259621300000000	145	165080500000000	104915000000000	877886600000000	555271800000000	43945640000000	304220900000000	150432600000000	779975800000000	562453300000000	310868600000000	66042220000000	424628900000000	650260100000000	657305900000000	724170900000000	455836400000000	299085300000000	303613600000000	27795260000000	278490700000000	21644660000000	6	1	5	8	954251500000000	2	15	15	0	359017600000000	35	102950800000000	11	5	35	188506600000000
K00615	123732700000000	409141400000000	581355100000000	392862500000000	182167600000000	421512300000000	308379100000000	118902000000000	102482900000000	623364400000000	530245900000000	505526800000000	826055900000000	700785700000000	780179400000000	694168600000000	499591000000000	577844500000000	126501900000000	694497900000000	608972400000000	612985400000000	790747900000000	629425700000000	689206000000000	542547300000000	728401100000000	685263100000000	551381500000000	632891400000000	499162300000000	423720600000000	261914500000000	275080800000000	177667200000000	257995800000000	262962900000000	220856900000000	234327300000000	243137800000000	197683800000000	222196600000000	39344350000000	125825800000000	239331500000000	412622900000000	291097500000000	218544400000000	31343500000000
K00616	237875400000000	858894100000000	152221400000000	875285100000000	52487100000000	13044960000000	60594610000000	219317800000000	19489260000000	150637900000000	119953400000000	119391500000000	2133070000000	155837800000000	168446400000000	2042529000000	113918000000000	141236300000000	244709100000000	12843300000000	111559900000000	126103400000000	194551500000000	130298300000000	128932400000000	107265100000000	143032300000000	175461100000000	127212400000000	150568100000000	440940500000000	518791500000000	252414100000000	183348300000000	805598200000000	154545000000000	172081100000000	15487830000000	153981600000000	134219400000000	104562100000000	191390500000000	396966700000000	838722200000000	200700300000000	444275700000000	172371400000000	163903000000000	301672400000000
K00619	878620200000000	161615500000000	11	291046200000000	75	915799300000000	273023300000000	779169800000000	748399900000000	362935800000000	358888000000000	407699000000000	841728500000000	540936100000000	603787200000000	573974000000000	277198000000000	39163520000000	949748200000000	439703600000000	681233500000000	378088500000000	35127880000000	324183300000000	496449800000000	26256210000000	653054100000000	403733200000000	323892800000000	340919400000000	147768000000000	978153700000000	537635400000000	29617840000000	188333300000000	251126900000000	33955740000000	308991100000000	209536800000000	307880100000000	220900600000000	287985100000000	551410100000000	186068000000000	202546100000000	396255200000000	17219010000000	204702700000000	580146800000000
K00620	545275000000000	194845100000000	23219490000000	18490960000000	951152700000000	189190100000000	127626300000000	502293600000000	444335400000000	297512600000000	238086100000000	231264900000000	397937200000000	340007600000000	365424400000000	354008900000000	234129000000000	250558700000000	536589500000000	303153200000000	265658400000000	269792100000000	373332200000000	293880900000000	295335400000000	236718900000000	332337600000000	335474500000000	24895560000000	296189800000000	541333300000000	651554800000000	326910800000000	161250200000000	944881400000000	218600700000000	118446100000000	132220500000000	91241560000000	717286900000000	651620500000000	795061000000000	442926500000000	126789900000000	200315300000000	669734800000000	179319800000000	248732300000000	351924500000000
K00622	111254500000000	397581800000000	417594500000000	534809600000000	240300600000000	244584700000000	743360400000000	945285700000000	78117410000000	564058700000000	324575700000000	574524900000000	979336700000000	587292600000000	106491000000000	362162600000000	443715600000000	373939800000000	108556800000000	604438500000000	53564310000000	493226900000000	648179700000000	413358400000000	762192300000000	481282800000000	706348800000000	515740000000000	297336100000000	524662200000000	108717700000000	382189900000000	266066900000000	194540800000000	10447770000000	5	152151200000000	199955300000000	134075600000000	12	111655200000000	220664200000000	216666700000000	6	7	142810600000000	145	833333300000000	202285600000000
K00624	1	5	0	0	0	157545300000000	0	3	0	0	0	1	0	0	0	0	0	0	3	0	1	0	0	2	1	1	215090500000000	0	0	5	0	3	0	0	0	0	0	0	0	0	0	0	2	5	3	0	5	1	224483100000000
K00625	462278500000000	166367300000000	22754290000000	151788800000000	765072700000000	189233700000000	138601800000000	4399583000000	361721000000000	245830100000000	199055600000000	178312200000000	32661940000000	228325700000000	279955100000000	295738200000000	159561700000000	223648100000000	41504850000000	23903570000	211621800000000	213044200000000	301107700000000	227876600000000	239708600000000	199259400000000	276931300000000	295351300000000	201136000000000	246709000000000	939322600000000	119098100000000	100434900000000	427431400000000	24893980000000	500184800000000	295330000000000	424495200000000	250305000000000	123813100000000	139887900000000	211871700000000	108140800000000	311741100000000	889340700000000	168922100000000	369321000000000	562378400000000	10876840000000
K00626	307141100000000	88701350000000	100464600000000	871963200000000	331373600000000	5907008000000	679066000000000	281225000000000	23983820000000	124453700000000	104718300000000	916597500000000	153232200000000	144909900000000	171183400000000	120362700000000	779901900000	96150550000000	29317590000000	156169100000000	140141800000000	118271000000000	14973090000000	125132800000000	153379900000000	117081300000000	184335100000000	127546500000000	99590120000000	114783500000000	284741800000000	202018200000000	107084200000000	138119300000000	967567700000000	118691400000000	123986500000000	104652100000000	119364700000000	126833400000000	104173800000000	124300300000000	156708900000000	469890800000000	902104500000000	147240100000000	141995900000000	771665800000000	131676100000000
K00627	205382500000000	820704200000000	881199800000000	713999700000000	295343300000000	561921100000000	672648700000000	184022000000000	175217100000000	896168100000000	782260400000000	678177400000000	147070100000000	11513400000000	134156400000000	103316000000000	735052300000000	820044800000000	210027500000000	127426700000000	102678600000000	102773500000000	131062600000000	986993600000000	112445400000000	886573700000000	135048300000000	954812400000000	822585500000000	88333640000000	105930900000000	924810400000000	65759720000000	237341500000000	166452600000000	303573700000000	21838710000000	32958590000000	168034200000000	737539300000000	853473900000000	125942200000000	680724300000000	207512700000000	536488200000000	578184500000000	173279100000000	187678400000000	742384700000000
K00630	128827600000000	190438400000000	0	5	0	125961800000000	283506800000000	501077000000000	106489900000000	126377900000000	142169100000000	11002760000000	14531190000000	129484200000000	278115000000000	100542300000000	876609400000000	712700100000000	114939800000000	784508400000000	909879800000000	173045400000000	257265700000000	144014100000000	66542750000000	6	876825600000000	131554700000000	105558900000000	193672000000000	3	471320500000000	35	5	2	1	0	1	0	0	1	5	3	1	833333300000000	110393300000000	107597500000000	376982000000000	161016300000000
K00631	128827600000000	195438400000000	0	5	0	125961800000000	283506800000000	501077000000000	106489900000000	126377900000000	157169100000000	120339000000000	15531190000000	129484200000000	278115000000000	100542300000000	976609400000000	712700100000000	114939800000000	784508400000000	909879800000000	173045400000000	257265700000000	144014100000000	66542750000000	6	876825600000000	141554700000000	105558900000000	193672000000000	183995600000000	618542800000000	384675100000000	5	8	539047600000000	37	471643900000000	20	144196100000000	234496600000000	564405300000000	8	2	183333300000000	110393300000000	207597500000000	376982000000000	246101600000000
K00632	46283320000000	521071800000000	229577500000000	423818100000000	41325690000000	18896190000000	188425400000000	361941600000000	356553300000000	482310300000000	43266800000000	333253900000000	42024070000000	18291140000000	385143500000000	33240970000000	283625000000000	546288800000000	792961200000000	381643700000000	341485500000000	603040300000000	535768800000000	557430400000000	286588100000000	241108100000000	522101900000000	472360200000000	419757400000000	50945780000000	444356900000000	174944800000000	115211800000000	222172200000000	201933200000000	24656690000000	476957400000000	744120300000000	382179900000000	561874900000000	50035830000000	707971600000000	256694100000000	366666700000000	95	422002600000000	228705500000000	24	102821800000000
K00633	804947100000000	178007700000000	168083800000000	39222650000000	905836400000000	358234400000000	157146400000000	666012800000000	621555800000000	39334130000000	405892100000000	42064680000000	60254550000000	35724940000000	497273400000000	529998800000000	39484360000000	4166249000000	711023100000000	439841300000000	429753800000000	460708000000000	566592400000000	427993500000000	437483800000000	338958900000000	470948900000000	502106700000000	398171200000000	470893100000000	36936140000000	31739050000000	198898600000000	222937500000000	129497500000000	191621200000000	243317800000000	171706100000000	177828300000000	160782100000000	2135	280424600000000	403358000000000	114597500000000	284652200000000	394256100000000	210147800000000	148238600000000	284252300000000
K00634	175915800000000	693244500000000	109973900000000	558465400000000	301055300000000	970202800000000	664812100000000	165393000000000	145596100000000	112823900000000	917221400000000	849876700000000	192858400000000	113371700000000	127352300000000	15442250000000	899530200000000	110454800000000	163690700000000	951394000000000	815430800000000	945749400000000	155922700000000	106316300000000	101220000000000	837645700000000	109856000000000	146469000000000	941275400000000	124325100000000	435694800000000	497128900000000	443414400000000	188175800000000	123156300000000	225792900000000	128712000000000	204224300000000	122879100000000	3675	318707500000000	660956700000000	49836150000000	143010600000000	444433800000000	521784400000000	120206600000000	203134900000000	530359000000000
K00635	0	0	0	0	0	0	0	0	0	0	0	0	0	0	0	0	0	0	0	0	0	0	0	0	0	0	0	0	0	0	194867400000000	218215400000000	0	0	0	0	233333300000000	2	0	0	0	0	0	0	0	0	0	0	3
K00638	45	0	9	5	0	1	1	154796700000000	872021200000000	383333300000000	1	333333300000000	2	1	404935200000000	2	1	104570100000000	227356800000000	61918720000000	633333300000000	411892400000000	309140200000000	0	71664830000000	45	579951100000000	3	25	110583000000000	171353900000000	379200300000000	204578300000000	1	0	0	154793300000000	154056700000000	15	0	0	0	497973300000000	25	802801400000000	3	5	0	157209200000000
K00639	103028800000000	369007000000000	169585800000000	947711100000000	185	313879700000000	115528900000000	99060320000000	904082800000000	265582200000000	182808700000000	177231500000000	357578400000000	406272600000000	388486300000000	19911370000000	139124000000000	172417200000000	103019300000000	547203800000000	552784800000000	255679800000000	315582900000000	275577000000000	588036400000000	496213100000000	668461700000000	205005100000000	207088500000000	223478800000000	45816780000000	543069800000000	573457000000000	211690200000000	135734600000000	25039340000000	169977100000000	28356260000000	128117200000000	557816400000000	625186200000000	940852700000000	731913400000000	20564320000000	482027600000000	515011000000000	124636200000000	16756150000000	700898200000000
K00640	291538500000000	931602700000000	131446200000000	849156400000000	525447700000000	103482500000000	673127300000000	254920900000000	235152800000000	170441300000000	143763100000000	156859300000000	186542900000000	147986100000000	177344300000000	199270400000000	129169900000000	155220200000000	289050700000000	165208800000000	151057500000000	164834200000000	193617300000000	15535670000000	159555400000000	130970300000000	168826100000000	166480700000000	152884000000000	175865400000000	538822000000000	561270500000000	408772300000000	287904900000000	188768700000000	293560600000000	120016200000000	205375200000000	957184000000000	14213030000000	203306900000000	238131300000000	537218700000000	130488800000000	313864700000000	742383000000000	266961200000000	339581500000000	433031900000000
K00641	101045600000000	344402600000000	109077400000000	981411200000000	95	276440500000000	21758580000000	118656600000000	864282800000000	121100400000000	108746300000000	169580800000000	21	208010800000000	131666700000000	176935500000000	263108100000000	15014390000000	882701100000000	639762800000000	323520200000000	264805400000000	290722700000000	22582570000000	501305900000000	614576100000000	100839700000000	137052900000000	156637600000000	215385500000000	143613700000000	69989700000000	826765800000000	108388900000000	784772600000000	175	100389900000000	181512300000000	666666700000000	153715100000000	402948000000000	841237600000000	521916200000000	633333300000000	268371500000000	208826100000000	582507800000000	183333300000000	526629200000000
K00643	2	0	0	0	0	0	0	0	0	0	0	0	0	1	0	15	0	0	1	0	0	0	15	5	0	2	0	5	0	0	1	0	0	9	10	8	0	0	0	0	0	1	0	0	0	18	2	11	1
K00645	427657300000000	136679800000000	16537960000000	118968000000000	570523700000000	11405050000000	917730600000000	414290400000000	358732900000000	204561600000000	168670700000000	152595300000000	239828800000000	219027800000000	241455300000000	235238300000000	153281600000000	188708200000000	444210900000000	249610600000000	205982000000000	189317200000000	263398500000000	196438400000000	232800500000000	189415900000000	259424300000000	215985300000000	166375600000000	200984600000000	262290700000000	195876600000000	119275900000000	176758300000000	129998700000000	161453800000000	140916700000000	125882700000000	134397600000000	156540000000000	107855800000000	121702000000000	174030700000000	551935800000000	108522400000000	188087300000000	177780000000000	102448500000000	147215600000000
K00647	518772400000000	608789900000000	643268900000000	746683300000000	7	170781500000000	293732700000000	515162600000000	436752600000000	472766000000000	479541700000000	268082200000000	165395700000000	512968600000000	18706370000000	833333300000000	783333300000000	105	499991500000000	364787500000000	248223000000000	48	100939900000000	573167500000000	252384800000000	308021200000000	351278500000000	383403300000000	278333300000000	466290100000000	253982100000000	18841180000000	144096000000000	489243100000000	369076000000000	485621400000000	159609500000000	141929500000000	161702800000000	719224500000000	541370000000000	580728300000000	191682700000000	688680500000	137691900000000	467681100000000	596194500000000	375363900000000	174541600000000
K00648	381534200000000	109253600000000	150212600000000	958674600000000	491637900000000	987532500000000	797010200000000	35498350000000	319255000000000	163034900000000	128250800000000	122247100000000	190706800000000	189811900000000	200820800000000	183919900000000	119581600000000	12926150000000	398142500000000	215700800000000	180333500000000	14533890000000	192100600000000	150238000000000	196719100000000	164280900000000	220061200000000	168441500000000	127913800000000	155882200000000	193835900000000	164993400000000	945022100000000	225536500000000	152668000000000	23283340000000	965253600000000	878143900000000	825524300000000	430396900000000	508529800000000	997511300000000	149472900000000	458624700000000	93369770000000	878975700000000	21438870000000	330691400000000	130470100000000
K00651	57325380000000	191869400000000	297771800000000	196087600000000	104731000000000	218256500000000	151025800000000	512868600000000	471011400000000	311678900000000	274183900000000	268894100000000	354183300000000	261427600000000	368790300000000	369453200000000	202016900000000	2799815000000	55756560000000	316941000000000	293606400000000	288327600000000	362086400000000	282084200000000	324672400000000	248840800000000	326938100000000	338353600000000	265077500000000	299361300000000	53262650000000	756552000000000	3721136000000	207937700000000	117182100000000	245163800000000	131578800000000	190381300000000	964061900000000	515	676226200000000	617661800000000	526471600000000	173622300000000	323864200000000	880675900000000	204350200000000	311084000000000	407335200000000
K00652	129124500000000	407178100000000	196563300000000	105699900000000	218333300000000	402130300000000	146651200000000	118904600000000	108190400000000	326312600000000	220969700000000	201507000000000	43900940000000	491289800000000	440363000000000	238555500000000	167993300000000	200047900000000	120734000000000	677329600000000	631617100000000	312385900000000	388181600000000	345633400000000	689665500000000	582425900000000	780957000000000	240327300000000	246213600000000	276478800000000	665783400000000	692791900000000	744190800000000	285410000000000	170871000000000	338358800000000	234542000000000	373619300000000	171094900000000	839766700000000	837589600000000	134723700000000	929877600000000	263962600000000	640424800000000	699287000000000	15867450000000	214471500000000	894653000000000
K00655	528857400000000	194828400000000	223486900000000	171748800000000	817249500000000	197390200000000	162617000000000	521435000000000	45685540000000	285093700000000	249343100000000	238359200000000	429276400000000	349946400000000	380298400000000	362853300000000	220144800000000	259632100000000	570720500000000	32016770000000	274926500000000	266314200000000	369016800000000	275296400000000	305473200000000	260744000000000	354393100000000	320097900000000	248622500000000	307151800000000	100513600000000	110141700000000	728553200000000	313030300000000	195994900000000	342564100000000	281283800000000	324683600000000	224611300000000	975989200000000	107261700000000	135914300000000	991597200000000	306732400000000	704296700000000	909588000000000	276190300000000	333816000000000	952270600000000
K00656	128152900000000	519706700000000	69752190000000	541648500000000	242289900000000	477641200000000	357951100000000	121337300000000	107453000000000	701177200000000	584315700000000	606639600000000	711669800000000	520535100000000	828810500000000	810283700000000	481704800000000	665577700000000	119461300000000	699469800000000	632918400000000	65876370000000	818696900000000	680611000000000	737556900000000	581535800000000	710746700000000	727534900000000	596985800000000	711198100000000	226892800000000	247577400000000	161665300000000	103286700000000	691293100000000	110058800000000	776662100000000	884143600000000	670404300000000	520489200000000	638717600000000	874302700000000	220773600000000	676597300000000	124853000000000	239211900000000	93229380000000	926896200000000	18634930000000
K00657	991863800000000	490682800000000	676556700000000	304264600000000	126786900000000	837999400000000	386448100000000	106211000000000	845437100000000	713492500000000	569630200000000	561773900000000	13630070000000	10875060000000	911518800000000	105022500000000	678935400000000	688400100000000	929240300000000	571191300000000	449214000000000	510877100000000	972947300000000	632030900000000	588462900000000	486198800000000	638222000000000	876465400000000	609369000000000	730049800000000	313370200000000	333399200000000	239574100000000	10865530000000	420796300000000	903129000000000	15296670000000	134173900000000	10028520000000	511586500000000	487097200000000	92722780000000	243883700000000	612305500000000	142854600000000	258506300000000	748145800000000	886751500000000	232440200000000
K00658	130571100000000	459836000000000	428843800000000	368712200000000	8	320440800000000	170343500000000	104295600000000	108106100000000	392674700000000	315002600000000	318119100000000	513762900000000	400442600000000	590908300000000	278304300000000	40070950000000	283492900000000	13088650000000	793283700000000	622408900000000	396748800000000	547191400000000	7036056000000	590362900000000	636699200000000	655700000000000	497902100000000	248467700000000	306458400000000	198160300000000	136207100000000	874351400000000	144622600000000	104696800000000	130635100000000	132641700000000	101117300000000	124371800000000	151724900000000	117576000000000	119251800000000	159593200000000	517400400000000	965280400000000	127756000000000	151683900000000	802467100000000	101399500000000
K00661	464990900000000	160184700000000	202824200000000	159378100000000	577023500000000	159169000000000	977667500000000	426647500000000	391561800000000	223166700000000	194999000000000	203051700000000	299149900000000	216377000000000	30443600000000	257339300000000	170289400000000	199070800000000	475596800000000	272727000000000	262402300000000	215440500000000	270695200000000	212764000000000	272918500000000	221780600000000	277721900000000	239250400000000	205725600000000	23639710000000	850229400000000	907884200000000	528364000000000	357693100000000	20834490000000	347871800000000	351384100000000	283415100000000	252145100000000	215752600000000	270793100000000	368081400000000	787598500000000	231537900000000	500673300000000	949173900000000	332554400000000	325351200000000	691167700000000
K00662	26431740000000	901737800000000	168467400000000	333998600000000	822075900000000	164072700000000	27743660000000	228524600000000	18778500000000	851215500000000	599588600000000	681485700000000	168993900000000	932582300000000	112655300000000	695421800000000	575502100000000	58512800000000	272863700000000	143940400000000	125312300000000	111178600000000	852063600000000	784418000000000	123671000000000	119170000000000	139089700000000	909968300000000	589154500000000	802986500000000	227923700000000	382220900000000	186827300000000	75	333333300000000	25	1	35	0	1	1	2	291666700000000	0	75	209220900000000	4	369485700000000	210685700000000
K00663	359454100000000	29361400000000	160169700000000	532664800000000	35	129519400000000	5	282288900000000	259535800000000	93769050000000	203525800000000	144379000000000	203891100000000	5	148369400000000	120889100000000	16	6	570456000000000	262731600000000	282743500000000	251258600000000	146161500000000	150736800000000	342624000000000	169461000000000	241581400000000	107875400000000	123646200000000	150611300000000	428574200000000	192559200000000	737603900000000	333333300000000	666666700000000	3	113629100000000	943784200000000	246666700000000	0	1	0	158038000000000	3	157210700000000	106029300000000	183333300000000	45	201384700000000
K00666	90583100000000	276316600000000	461449400000000	177733400000000	178227100000000	664766600000000	81171950000000	853168800000000	807723200000000	10691520000000	823531300000000	767211600000000	592142900000000	457489400000000	548841900000000	124037100000000	851215700000000	975082200000000	961928000000000	534010700000000	515068600000000	105663500000000	140414000000000	109333200000000	490376900000000	431947700000000	559867100000000	106502700000000	82805170000000	100278000000000	744208000000000	45454280000000	468371000000000	229921000000000	140885600000000	236504700000000	170466100000000	215149500000000	100620000000000	767900500000000	672224500000000	96421880000000	445577500000000	132689300000000	346434500000000	632472000000000	165729700000000	237798000000000	512495100000000
K00672	7	16	0	0	10	0	5	4	4	8	8	8	13	6	6	12	14	16	14	5	12	15	4	4	0	3	4	2	6	11	0	2	1	0	0	0	0	0	0	0	0	0	0	0	0	3	0	0	0
K00673	0	0	0	0	0	0	0	0	0	0	0	0	0	0	0	0	0	0	0	0	0	0	0	0	0	0	0	0	0	0	136131100000000	484607400000000	148053700000000	5	3	5	230927000000000	373876000000000	164761100000000	200749300000000	179181500000000	357564500000000	2	233333300000000	241543300000000	0	0	0	238141500000000
K00674	863991800000000	43895070000000	603653000000000	222899900000000	147678800000000	651651200000000	255500700000000	930859700000000	682007700000000	571160200000000	582201000000000	467675300000000	133852100000000	110277400000000	8308481000000	953815100000000	773806200000000	678641500000000	810589100000000	491894000000000	33524490000000	396661500000000	984508300000000	569786100000000	463306100000000	393552600000000	506508600000000	831532200000000	597598600000000	620299400000000	185803300000000	149268800000000	990542700000000	324140400000000	214394600000000	449888600000000	872221100000000	706865000000000	564967500000000	232864300000000	465808600000000	332253700000000	138805800000000	486486500000000	74819920000000	148050700000000	49587330000000	56226970000000	179811700000000
K00675	111254500000000	397581800000000	417594500000000	534809600000000	253636900000000	285348100000000	53783810000000	945285700000000	78617410000000	818804100000000	458016300000000	6537129000000	999336700000000	587292600000000	106491000000000	821304500000000	891392400000000	544943100000000	109556800000000	624438500000000	54564310000000	803580500000000	114852900000000	656594900000000	762192300000000	481282800000000	706348800000000	847718600000000	392325300000000	699818400000000	108717700000000	382189900000000	266066900000000	237578400000000	133689200000000	120663700000000	152151200000000	204955300000000	134075600000000	150755500000000	116655200000000	26348830000000	216666700000000	6	7	343270000000000	217049000000000	156395100000000	202285600000000
K00677	397408600000000	107480700000000	60195000000000	65	55	112555700000000	471405200000000	348823500000000	347827200000000	537245000000000	5739251000000	490280900000000	117739800000000	16579680000000	10740320000000	36430870000000	46497020000000	407795500000000	343715500000000	185107000000000	205943400000000	760517700000000	678944600000000	702965400000000	17095070000000	182316000000000	221633800000000	5828874000000	533096500000000	717546600000000	229182300000000	241167900000000	21069110000000	139317800000000	959567300000000	128910500000000	810748300000000	109134400000000	435969600000000	107428600000000	287844600000000	505722200000000	304155200000000	873910400000000	219932900000000	415863400000000	618354600000000	118269800000000	277113900000000
K00680	119500400000000	0	0	0	0	0	0	623327700000000	0	0	0	5	459944100000000	351292900000000	15	0	0	0	562656100000000	15	368401100000000	0	0	0	0	0	0	1	0	0	0	0	0	51771850000000	32622160000000	334749000000000	0	0	0	0	0	5	0	2	0	1	188815800000000	0	0
K00681	344848000000000	10045060000000	436366700000000	620980900000000	286207600000000	271528800000000	232807500000000	254728300000000	288441200000000	894433100000000	576566400000000	109368200000000	255716800000000	239320100000000	184727500000000	676080000000000	151237300000000	433319300000000	342105900000000	164194700000000	156876000000000	116558300000000	105071800000000	849217800000000	172846300000000	14238020000000	171092100000000	805048500000000	856795800000000	900840000000000	502506700000000	240892400000000	137968500000000	929969900000000	504085100000000	815952700000000	638882900000000	541536200000000	497556400000000	49691340000000	70027070000000	871633300000000	159563500000000	427383400000000	573670300000000	315878000000000	922521400000000	132511000000000	129190800000000
K00683	103611500000000	224288900000000	232576600000000	656876000000000	1	269867400000000	607758600000000	740960400000000	725946900000000	583333300000000	144828600000000	5	264426400000000	400867400000000	337872600000000	1	181947300000000	35	822920200000000	776181300000000	548327400000000	9	21087030000000	996370400000000	423611600000000	490982300000000	617449600000000	939337900000000	466666700000000	622121000000000	208892200000000	29907570000000	321757100000000	0	2	381947300000000	8	771827800000000	2	0	0	1	355783000000000	890134500000000	211657800000000	95	0	1	399813100000000
K00684	658251800000000	123084100000000	825085500000000	1535994000000	15	35843520000000	642410700000000	491016800000000	645870800000000	778666700000000	3	105	3	4	5	3	671163400000000	298441900000000	566547900000000	289753100000000	23056530000000	101812300000000	143216100000000	744487700000000	34810970000000	354058700000000	421745600000000	15	116526700000000	199571400000000	599806000000000	373292500000000	691019200000000	212176000000000	187190600000000	19447700000000	152745300000000	331657800000000	15008220000000	771499000000000	139474300000000	162932000000000	719985800000000	149626400000000	751258500000000	407121400000000	167083400000000	209608500000000	845328800000000
K00687	1080097000000	111410800000000	715841100000000	51595200000000	529264700000000	8	8	108005000000000	958546900000000	317771700000000	326087000000000	505	152835400000000	296561000000000	864183900000000	39	42	34	118366600000000	748153400000000	874494400000000	633912200000000	22	468837500000000	714745900000000	5392342000000	36	415428000000000	607729600000000	73	28	405	9	5	3	4	0	0	1	1	1	2	8	4	4	16	2	8	14
K00688	187372100000000	686034300000000	863350000000000	647638100000000	314075000000000	643219400000000	449458700000000	182707400000000	161189300000000	979130600000000	814629400000000	759949900000000	117121300000000	893948800000000	118044400000000	110464600000000	579426900000000	86779300000000	178071600000000	103679600000000	911613700000000	906541100000000	117466600000000	909251500000000	106930700000000	853040700000000	110184000000000	106149000000000	828812600000000	957856200000000	197729400000000	255058100000000	167641100000000	870384700000000	544041800000000	916543300000000	520974500000000	668462400000000	392808200000000	258480800000000	304707000000000	395098900000000	201545200000000	630150800000000	113802900000000	283172000000000	654482900000000	105925500000000	186077900000000
K00689	516952300000000	412100000000000	595144400000000	287383400000000	673785800000000	14	34	480941200000000	423919100000000	792390300000000	836156600000000	834127400000000	11325480000000	151074300000000	448900700000000	857610000000000	534936000000000	80	545776700000000	292079500000000	277919500000000	108072200000000	947000400000000	828739100000000	367027200000000	215124500000000	286746100000000	866338700000000	655	966506900000000	516214900000000	66507470000000	445984100000000	6	5	7	12	18	11	0	4	35	53	11	355	250749200000000	1	9	550655400000000
K00690	242958200000000	63556370000000	154866200000000	974904200000000	253424900000000	134756500000000	573164500000000	244745400000000	196812900000000	125134100000000	101385200000000	958312800000000	234643000000000	197079800000000	189979000000000	180669900000000	106577200000000	121405400000000	254029800000000	139875200000000	120180000000000	105502500000000	172242700000000	115900700000000	14040690000000	10513510000000	146937200000000	156245000000000	117685200000000	131928500000000	283473700000000	333476100000000	144420900000000	670235300000000	41754130000000	568328000000000	149803300000000	695827900000000	903813800000000	300574800000000	56529750000000	704675400000000	225793100000000	811461800000000	947267700000000	197341000000000	77896730000000	125972500000000	178020700000000
K00691	118117500000000	592142900000000	210153600000000	576086500000000	357371900000000	564435500000000	489359100000000	122135000000000	101002300000000	356400300000000	367478800000000	284407000000000	361681800000000	36692290000000	276658200000000	153846300000000	184509500000000	150754000000000	112964900000000	697920000000000	607342400000000	503315900000000	617774300000000	464760200000000	604458700000000	581791600000000	81679470000000	406718500000000	3264232000000	365338700000000	750666700000000	941890800000000	980663800000000	534220500000000	314841100000000	530078800000000	22531880000000	397254400000000	179639600000000	770539300000000	874181000000000	143115200000000	10772460000000	361062500000000	819131900000000	12861770000000	264977400000000	464525600000000	112991500000000
K00692	467739200000000	236845900000000	436495600000000	32047930000000	81676670000000	215053800000000	124158800000000	402728900000000	415506500000000	337063300000000	252662700000000	353913200000000	515450000000000	245050700000000	536897300000000	376475400000000	303557900000000	332533300000000	501509400000000	284700700000000	3134790000000	329650500000000	332010300000000	275274900000000	325085200000000	218532200000000	24929530000000	263074700000000	287455800000000	275095900000000	839510200000000	125030600000000	459750400000000	199457200000000	842984000000000	175	7	118418100000000	4	2	25	25	453186200000000	9	175944600000000	721202900000000	228202700000000	301068500000000	704592600000000
K00693	731297700000000	3	0	1	1	100377600000000	0	506304800000000	347358700000000	2	1	1	0	0	0	0	0	0	960778000000000	45	777605700000000	0	5	1	504750700000000	75883990000000	756026100000000	5	1	442788800000000	137029100000000	30898990000000	300617100000000	121205200000000	62906980000000	59511400000000	13	143194300000000	45588490000000	0	3	119955400000000	225157500000000	566907300000000	19954400000000	167770200000000	4	465384600000000	288303400000000
K00694	173172000000000	225868200000000	755047900000000	323365300000000	166631900000000	562702300000000	264253200000000	158626100000000	146134700000000	750542700000000	605298100000000	592367400000000	501071000000000	607644200000000	815107200000000	53169070000000	346695300000000	413741900000000	170799000000000	104072100000000	867467400000000	739136100000000	782199500000000	699417500000000	926910900000000	74209570000000	982725600000000	616831200000000	566626400000000	640968300000000	297835100000000	196872400000000	113800100000000	726491900000000	413861300000000	890090800000000	526377800000000	6721654000000	279223500000000	687340300000000	102774300000000	136787000000000	120205100000000	33716320000000	29029520000000	182338800000000	633272800000000	108393100000000	125640900000000
K00696	133129800000000	3	0	1	1	100377600000000	0	906304800000000	547358700000000	2	1	1	0	1	0	0	0	0	136077800000000	5	107760600000000	0	5	1	604750700000000	95883990000000	756026100000000	35	1	542788800000000	257029100000000	40898990000000	400617100000000	151205200000000	62906980000000	59511400000000	16	253194300000000	168921800000000	0	3	119955400000000	435157500000000	106690700000000	25954400000000	363577800000000	4	465384600000000	478303400000000
K00697	20639140000000	23	664659600000000	338141000000000	43068240000000	615215200000000	75	242664600000000	210098300000000	520801700000000	305786300000000	241297900000000	87299800000000	859755600000000	86346580000000	731387600000000	691622400000000	902895900000000	283066300000000	161678900000000	114509100000000	504598500000000	440361100000000	33587910000000	109216200000000	127509100000000	140090900000000	280886000000000	298346100000000	387561900000000	207398900000000	204760800000000	217161400000000	431408500000000	260585900000000	463579500000000	888087100000000	132938800000000	51	316761100000000	331852900000000	558157600000000	243214600000000	915712600000000	199723100000000	155981200000000	38	423538500000000	250892500000000
K00700	176153400000000	749216700000000	87008780000000	589982600000000	320588200000000	831227200000000	561531500000000	164019500000000	147275200000000	113233200000000	912727200000000	888945000000000	160133000000000	115208500000000	127371700000000	146239300000000	872475500000000	106112400000000	17484590000000	942932000000000	846877200000000	102677500000000	139937800000000	104492600000000	978543400000000	77479970000000	10700780000000	12556130000000	971907500000000	115697000000000	235877400000000	247718100000000	143064100000000	746446900000000	409854800000000	824234700000000	69736510000000	697137600000000	48356860000000	281246300000000	303930000000000	412993500000000	199847700000000	62153630000000	110355200000000	337373900000000	811743000000000	11878880000000	18138560000000
K00701	583946700000000	692491000000000	0	453103700000000	0	119298900000000	0	491414100000000	396441700000000	465911000000000	338385000000000	241607200000000	216805300000000	478394100000000	756846900000000	670516000000000	385625200000000	437679000000000	892430700000000	534125200000000	362009300000000	476527500000000	840275300000000	61439760000000	323373800000000	451271600000000	370135400000000	462050500000000	349958700000000	408956600000000	4	361608800000000	2	4	1	2	339099000000000	4	0	1	0	2	2	2	1	839280200000000	0	1	422886200000000
K00702	608375300000000	215955000000000	298083000000000	143760400000000	527759400000000	205188100000000	189949100000000	555867100000000	481326400000000	32246510000000	258589600000000	237645500000000	385179400000000	319102200000000	371804500000000	35172900000000	188787400000000	244780900000000	601809600000000	338404900000000	282480000000000	299600800000000	400835900000000	310449400000000	326184700000000	251413700000000	360468400000000	358633900000000	263892800000000	324402900000000	518264300000000	742348800000000	402129800000000	212726700000000	14592350000000	234899800000000	105008600000000	132521600000000	618638800000000	556957800000000	625356600000000	660300700000000	557633400000000	124114900000000	306975400000000	586371700000000	210854800000000	277146600000000	495926000000000
K00703	797066900000000	324930200000000	389635700000000	297705000000000	167524000000000	279866600000000	197694800000000	749851200000000	698556900000000	416099400000000	361384600000000	37133140000000	524013100000000	456631500000000	524336000000000	481982700000000	328739500000000	388413900000000	798562300000000	457132500000000	436996800000000	402018900000000	486307400000000	411386300000000	478954900000000	357013000000000	453161200000000	467414000000000	383179200000000	435223000000000	848456200000000	113256000000000	526144000000000	220374000000000	167332800000000	322426800000000	253264700000000	226760000000000	161079700000000	782599100000000	831820700000000	131810000000000	783741400000000	216501000000000	392500800000000	123684400000000	266043700000000	44734100000000	701172500000000
K00705	147894900000000	580465800000000	686953200000000	464245600000000	261995900000000	667068700000000	453367900000000	142405900000000	126590100000000	900430500000000	747321300000000	677880000000000	132647300000000	100305100000000	101539100000000	116909400000000	698682700000000	863013900000000	147141400000000	803470800000000	69160340000000	779180600000000	114001400000000	85230960000000	81943410000000	655123400000000	906702700000000	100136700000000	750058200000000	88526980000000	180429900000000	217952100000000	127072700000000	6936461000000	396806800000000	791797100000000	526461500000000	598285300000000	379506200000000	218015600000000	211694000000000	310606400000000	175004600000000	566078900000000	103314200000000	257370900000000	642748300000000	912282000000000	166264500000000
K00712	162818800000000	386832800000000	874468700000000	659898700000000	436107900000000	513271500000000	207117100000000	152785200000000	145784300000000	754174800000000	715363000000000	778302700000000	474844800000000	480197300000000	893347200000000	702881600000000	507376600000000	594508700000000	166030400000000	109908000000000	90763200000000	813470700000000	781064100000000	700899000000000	101264400000000	729193800000000	832260300000000	678001700000000	696484200000000	788094100000000	234122500000000	224583100000000	127162900000000	468624200000000	336302500000000	693904000000000	257399500000000	680461800000000	280844800000000	214058200000000	241205700000000	355280200000000	198411900000000	665202000000000	110132500000000	267436200000000	461223800000000	878868300000000	154818500000000
K00713	199793100000000	522272300000000	149362500000000	178270100000000	690493900000000	133566700000000	157856800000000	159081900000000	138614300000000	147248800000000	141983800000000	108720400000000	288122300000000	255292200000000	179274900000000	223729200000000	177622900000000	176088900000000	254102400000000	148588900000000	107431400000000	123508900000000	298986500000000	19191320000000	958297300000000	885367800000000	104845500000000	183994100000000	12669670000000	982011200000000	263386900000000	374134100000000	277251600000000	333663500000000	228476200000000	226052300000000	613207500000000	79680120000000	141959700000000	459717900000000	201882700000000	125382100000000	174272400000000	25	189828300000000	533190500000000	194639900000000	350894400000000	21177760000000
K00720	527779300000000	187964700000000	1	247993300000000	3	1712331000000	566069400000000	263051500000000	323534100000000	698205100000000	785631100000000	5	3	2	110935000000000	2	45	2	342965100000000	294725800000000	92037980000000	120500300000000	129693500000000	159600000000000	119211900000000	214129800000000	15155160000000	8	798662200000000	12	665051900000000	10417590000000	144824400000000	15	2	55	0	1	1	1	0	0	532741400000000	2	379694000000000	524420500000000	4	10	171770700000000
K00721	153819800000000	581659300000000	917575900000000	114269500000000	473557200000000	989677100000000	740812300000000	137183000000000	133522600000000	118088500000000	101516100000000	98300500000000	10008820000000	873387300000000	116151100000000	148332200000000	918756400000000	110965900000000	167434500000000	934710400000000	810828000000000	123846000000000	148126400000000	127619800000000	819322600000000	721294500000000	93037360000000	121482200000000	104627700000000	124670500000000	310279900000000	413578800000000	384516800000000	165232800000000	114425000000000	182788100000000	891290900000000	177425600000000	827840000000000	184248800000000	358463000000000	579219600000000	502920300000000	158354500000000	344375500000000	525331700000000	121414900000000	19234800000000	466433600000000
K00728	810375100000000	533183600000000	488300400000000	509017900000000	203568800000000	346489400000000	739106400000000	82579320000000	660914700000000	794038700000000	532837900000000	469487800000000	112992100000000	970522300000000	697324500000000	79858600000000	679677600000000	646994600000000	116476500000000	635207100000000	542516500000000	745645700000000	110748900000000	841369100000000	487867000000	436188500000000	632788500000000	764060500000000	601175900000000	651137900000000	157481000000000	204418400000000	904844600000000	813172700000000	367859700000000	889051300000000	315682600000000	399490300000000	24	303907300000000	34739820000000	536562200000000	132076100000000	353333300000000	61506140000000	139972900000000	813824200000000	124218900000000	11370850000000
K00737	153925000000000	0	1	3	0	0	0	567971800000000	16074130000000	1	322400100000000	161055100000000	13889820000000	919189200000000	159448500000000	1	0	0	144038400000000	349574800000000	873261800000000	0	140140300000000	0	145787900000000	379454900000000	138022400000000	1	5	2	3	3	0	0	0	0	0	0	0	0	0	0	2	5	0	0	0	0	5
K00743	507548300000000	5	1	363672000000000	3	55	134188400000000	751958200000000	397426200000000	190308100000000	233392100000000	75560890000000	407369500000000	958937500000000	172428700000000	12	9	85	271592400000000	280754700000000	948320600000000	633454900000000	371544300000000	181751300000000	10910760000000	361178100000000	394654200000000	164013100000000	143677100000000	210613400000000	10	9	6	206367300000000	18417270000000	255079500000000	2	2	35	0	1	5	3	1	9	333577700000000	127337900000000	16858550000000	212259700000000
K00745	492409300000000	38483420000000	167674500000000	161272400000000	895353100000000	468954300000000	176016600000000	503641700000000	462396900000000	575447500000000	463247000000000	51247330000000	560655300000000	449935600000000	4545392000000	772902300000000	559167500000000	584824400000000	52412260000000	321295600000000	379672600000000	44433200000000	734172600000000	482997900000000	327556600000000	239063900000000	273667900000000	642277700000000	49188680000000	537727000000000	449326800000000	63776270000000	307958300000000	206270600000000	237682500000000	396215200000000	24595590000000	300535400000000	200685200000000	773354200000000	13202530000000	114996600000000	431800900000000	17271450000000	189622300000000	141541700000000	394235500000000	533460500000000	36128030000000
K00748	523912400000000	154098800000000	557726700000000	109043900000000	5	110088400000000	618854300000000	540566900000000	374393500000000	849260400000000	751850100000000	773653100000000	209347100000000	238156100000000	144995800000000	691882500000000	739994200000000	686900300000000	478385300000000	22047640000000	196607200000000	946384500000000	109821300000000	835013900000000	262703300000000	223534100000000	340225900000000	877345000000000	608380100000000	811449000000000	26805610000000	283526000000000	246825800000000	127484500000000	847239200000000	122916100000000	887635700000000	107382800000000	59951640000000	27203150000000	317087800000000	639252900000000	31401600000000	777182900000000	232335700000000	446512300000000	11802430000000	168021700000000	328675200000000
K00752	0	0	0	0	2	0	0	1	1	1	0	0	0	0	0	0	0	1	0	5	0	0	349622800000000	3	0	0	0	1	0	1	6	5	2	26445940000000	120616400000000	136957800000000	0	0	0	0	1	5	0	0	0	552048500000000	420687200000000	527444700000000	0
K00754	835191900000000	275893900000000	315454400000000	271134700000000	964661200000000	50190480000000	360355000000000	854283900000000	755449600000000	53039550000000	460471100000000	469745300000000	867403600000000	629637800000000	654602500000000	56520200000000	46133350000000	441653900000000	974647200000000	540089800000000	593656000000000	595001600000000	662986900000000	505447100000000	531432100000000	365837900000000	563018300000000	630245500000000	474081500000000	55080810000000	165903700000000	20809060000000	155642000000000	612871800000000	24721760000000	574435100000000	446843100000000	735343000000000	27977160000000	55	185	248277700000000	21053790000000	435181900000000	12743870000000	200175700000000	484103000000000	73886770000000	186827900000000
K00756	171063600000000	624959300000000	410367800000000	44197700000000	142919600000000	358492800000000	418896800000000	156284700000000	13619800000000	804291300000000	598604200000000	660501600000000	125829200000000	91643860000000	106192300000000	821582600000000	877650900000000	727669900000000	190403900000000	101617000000000	842291700000000	833877800000000	107737300000000	867714400000000	894890700000000	752901300000000	114747400000000	887535000000000	698289100000000	826068800000000	276637600000000	304040900000000	182122400000000	105464700000000	707429600000000	106624600000000	356842600000000	766537100000000	184303400000000	425850600000000	345594300000000	634868300000000	230448900000000	627775100000000	144227100000000	529019000000000	111090300000000	205969300000000	227678300000000
K00757	288192900000000	766785300000000	110966700000000	955365900000000	383088700000000	489523000000000	529289600000000	25078540000000	242735300000000	1098992000000	890393700000000	923604100000000	107166200000000	105998100000000	162990100000000	971523000000000	515966100000000	811113900000000	287522400000000	16492880000000	134233800000000	104197800000000	12182830000000	107536500000000	158073000000000	130055000000000	168243600000000	107830200000000	907867600000000	106590300000000	403738500000000	549648700000000	327675100000000	203037300000000	105911400000000	180533900000000	875634700000000	130782900000000	600017400000000	184589800000000	309514000000000	483066100000000	495209900000000	154663700000000	308299000000000	47019780000000	113300000000000	189629000000000	462583000000000
K00758	168847600000000	589314000000000	441825100000000	471597300000000	151133300000000	342371400000000	416171000000000	150636200000000	131240100000000	798581900000000	589855000000000	654933900000000	12738820000000	884627000000000	108849600000000	819440800000000	889519400000000	718905900000000	184979300000000	996480400000000	835969500000000	838667600000000	107090100000000	86608190000000	860606600000000	737675600000000	108211800000000	877516100000000	688441200000000	797031100000000	230138100000000	260834200000000	133152900000000	809534900000000	453013500000000	709108300000000	250048500000000	449112600000000	119303400000000	350850600000000	280594300000000	533201600000000	135960500000000	397104200000000	544931700000000	369693100000000	898595100000000	166910300000000	128717800000000
K00759	333278000000000	138795100000000	166790100000000	127549600000000	697590200000000	134071100000000	888947500000000	313480800000000	267768000000000	203377300000000	179145700000000	184964900000000	299483100000000	190678200000000	249447200000000	239904500000000	183278100000000	203009700000000	366602100000000	197164400000000	169824000000000	191191400000000	249461400000000	186180400000000	205668400000000	146279300000000	210379000000000	22974730000000	183826000000000	207489800000000	50115210000000	573875800000000	319743400000000	186490600000000	112082500000000	192632700000000	145895900000000	141547500000000	739928200000000	393711200000000	640816700000000	715343900000000	463737900000000	127174500000000	271248200000000	604870400000000	153685500000000	28508370000000	409459500000000
K00760	193304000000000	835630200000000	974402100000000	745491000000000	393002400000000	767390000000000	562867900000000	188721500000000	15734060000000	122097000000000	102163800000000	959790200000000	177118500000000	118309900000000	149261900000000	158920200000000	101787000000000	116886000000000	207290600000000	110940500000000	105363400000000	10519310000000	157308900000000	114417300000000	109410600000000	932465000000000	116826200000000	139004100000000	107716800000000	123036200000000	257234400000000	374636500000000	171570900000000	130838400000000	568113100000000	113860800000000	944880200000000	806334300000000	678277900000000	283123500000000	503035800000000	608078500000000	259576400000000	100853500000000	137862300000000	328953400000000	109381900000000	126981400000000	202844900000000
K00761	297592500000000	107439400000000	147910300000000	986639900000000	471545100000000	117474300000000	864510200000000	273600100000000	241865100000000	163021200000000	138302000000000	141421200000000	239429000000000	18719790000000	189546300000000	200277500000000	138605100000000	166966200000000	286697100000000	161775500000000	150660400000000	149603900000000	208059000000000	151612300000000	147901200000000	128516700000000	170977200000000	184565800000000	137592200000000	172555800000000	32802120000000	458913800000000	294567900000000	108769000000000	767128900000000	128850800000000	848710400000000	113667300000000	757075600000000	411356000000000	506962700000000	527873600000000	366181300000000	891374000000000	224757600000000	478435000000000	124812700000000	15725410000000	351141600000000
K00762	423648900000000	153522300000000	196265300000000	137685600000000	707495800000000	149838700000000	918227600000000	390136900000000	346091900000000	222941100000000	189135900000000	18450790000000	339933900000000	248839600000000	28375060000000	278653000000000	194137100000000	19756220000000	406091700000000	226338200000000	200215000000000	197324700000000	262637900000000	195518000000000	229848200000000	18210920000000	23626460000000	264924500000000	20256600000000	22314950000000	506445500000000	644120900000000	327466400000000	162442100000000	755508900000000	147149200000000	141366000000000	121730200000000	107783200000000	425915100000000	471905600000000	653000900000000	423915200000000	126414500000000	22939320000000	577106400000000	160426100000000	19643920000000	371837700000000
K00763	607539400000000	240009300000000	310231600000000	219372700000000	124714800000000	261271400000000	18577850000000	555782500000000	511065800000000	373673800000000	314067600000000	300037700000000	491077800000000	415065200000000	433595300000000	488487300000000	310306900000000	351933400000000	598142900000000	331294700000000	29522310000000	34751470000000	482052800000000	361912900000000	329194900000000	264378300000000	367063100000000	430934200000000	316032500000000	376424000000000	857367900000000	947819700000000	503084900000000	29975860000000	157168700000000	329482600000000	210860500000000	266961400000000	142660800000000	101326600000000	901034900000000	162482600000000	654912100000000	197677800000000	3334868000000	104539800000000	267054200000000	414414300000000	643417000000000
K00764	853985400000000	31107210000000	39323870000000	279849900000000	153555800000000	37840610000000	238899900000000	817013700000000	722808500000000	538558100000000	434073800000000	414038900000000	568462800000000	465352300000000	534432300000000	641669000000000	378075300000000	482749900000000	849769000000000	482780100000000	432856300000000	510596600000000	666360200000000	524741600000000	471124100000000	383229500000000	489715300000000	57344890000000	454937900000000	541649100000000	114116300000000	13320230000000	101388000000000	526391600000000	381331800000000	618262000000000	33352410000000	472348700000000	241488100000000	171863500000000	147191500000000	217068200000000	124854200000000	377401000000000	832695100000000	185889000000000	442567900000000	635771000000000	111022500000000
K00765	556744600000000	174644000000000	255425000000000	176082000000000	995713300000000	195336200000000	146803000000000	505339200000000	459517500000000	301603300000000	261424000000000	251836500000000	393136100000000	302972900000000	36258860000000	364191900000000	275444400000000	28099600000000	567058900000000	326740700000000	275390000000000	300660100000000	37919450000000	291931400000000	328272400000000	247182400000000	322483400000000	331507200000000	279248800000000	312434500000000	634270700000000	692020900000000	422985000000000	258486600000000	128016800000000	25042650000000	132071400000000	184183500000000	116704200000000	758362200000000	99755130000000	112025500000000	509625800000000	173469200000000	303209800000000	978974400000000	257889800000000	329944700000000	485311900000000
K00766	325746000000000	972794800000000	147369400000000	110285600000000	515195200000000	140738500000000	734008000000000	311085900000000	266223400000000	187070000000000	153171400000000	14569550000000	191346600000000	167626700000000	219520100000000	208820500000000	121031600000000	162074200000000	328295100000000	182268500000000	159147700000000	172182000000000	231406200000000	171989600000000	196258100000000	156784300000000	186472700000000	20083590000000	155613900000000	195409100000000	550333500000000	478595900000000	324517000000000	211043200000000	117608800000000	2289674000000	114386900000000	163392500000000	121648200000000	77085010000000	117868400000000	113313300000000	457211100000000	10906780000000	276777600000000	683785600000000	162128100000000	26788990000000	336619000000000
K00767	25252770000000	999818900000000	12442990000000	101126000000000	625661900000000	105157600000000	704363100000000	247856900000000	227849300000000	170615200000000	132809300000000	139461100000000	172326300000000	165427800000000	179054900000000	196340100000000	148724500000000	154057800000000	270747200000000	155876400000000	133895700000000	15530070000000	206477300000000	163849700000000	155382600000000	119061300000000	149953500000000	189196900000000	140061000000000	165706200000000	1516113000000	122136700000000	796646500000000	113671900000000	815682500000000	100908400000000	917290900000000	814416400000000	887170700000000	900567800000000	970648800000000	100802300000000	117573300000000	382332200000000	814648600000000	116833000000000	107464200000000	709953900000000	903695600000000
K00768	309339300000000	997444800000000	11185680000000	105301900000000	452250300000000	667380400000000	770658600000000	30703130000000	25702120000000	148661900000000	120236500000000	108870600000000	184557000000000	182842100000000	190965000000000	174205700000000	16997720000000	130500500000000	335491700000000	180222300000000	156666200000000	135668800000000	186552900000000	133906500000000	164355500000000	13430560000000	191092600000000	153698200000000	118294300000000	138164200000000	495484700000000	525038000000000	358069100000000	150506100000000	100331100000000	162271300000000	104810600000000	114306200000000	843993400000000	4698094000000	730741600000000	765785700000000	47838850000000	148773100000000	290517500000000	710459800000000	16245280000000	246387400000000	409126200000000
K00769	145796200000000	1	15	1	5	322736000000000	2	131986000000000	225570700000000	1	45	2	203546400000000	10	158403700000000	4	3	25	198686300000000	110361900000000	11	0	45	3	604338300000000	136362600000000	105	3	350393700000000	2	141790700000000	887366200000000	207377500000000	594917000000000	1	35	897324600000000	75	867699800000000	2	392242500000000	177342700000000	112135200000000	1	4	292539200000000	11159470000000	130363400000000	145215400000000
K00771	667988700000000	12961470000000	128642000000000	0	29940790000000	0	0	565032200000000	190823500000000	844694500000000	14866790000000	395616500000000	739491300000000	433333300000000	540350900000000	1	490455500000000	942529300000000	112485800000000	65	3	352409500000000	303360000000000	995428500000000	914327300000000	378642000000000	75	397141600000000	92060740000000	553256700000000	5	0	0	0	0	0	0	0	0	0	0	5	0	0	0	3	0	0	1
K00772	983403900000000	50348660000000	314585700000000	445747300000000	198936400000000	198835900000000	292941000000000	855403700000000	79301000000000	48590380000000	424070000000000	376612700000000	977739300000000	65986720000000	707230900000000	613229500000000	533556100000000	411639100000000	10095310000000	617155500000000	555718900000000	507874400000000	587533900000000	483898100000000	49476000000000	475920900000000	632184400000000	465803600000000	37495580000000	474010100000000	214383000000000	236300800000000	125315300000000	541839000000000	380147900000000	709432700000000	358237400000000	521551600000000	161666700000000	108981900000000	195221000000000	215654800000000	152647100000000	326224900000000	867013700000000	311656000000000	556802600000000	159373500000000	178414800000000
K00773	527488800000000	220800600000000	273086700000000	157222500000000	900680200000000	222950600000000	177989400000000	51575790000000	426051700000000	301350900000000	242663200000000	245031400000000	484845200000000	377709000000000	380692000000000	394641900000000	295772000000000	285026100000000	532646500000000	287688600000000	264104600000000	287657000000000	397072300000000	295166100000000	287086900000000	234658500000000	321889400000000	339785900000000	263239300000000	309217600000000	933223500000000	104152500000000	797967400000000	397638900000000	235494900000000	396651400000000	350933200000000	377164800000000	185977800000000	109061800000000	12475540000000	218602200000000	882273000000000	266238400000000	526259800000000	123740800000000	325098500000000	468428300000000	837852400000000
K00782	11344040000000	551785700000000	117553500000000	243085100000000	108059300000000	29913750000000	590117100000000	124018800000000	104914200000000	725760400000000	320891600000000	32839330000000	306092700000000	412576900000000	318080600000000	520017300000000	796638100000000	32198320000000	168944500000000	820098700000000	497183200000000	600808800000000	907627900000000	766720800000000	654401400000000	645628000000000	726345100000000	382002500000000	423913600000000	369901700000000	706576100000000	640661000000000	695487400000000	235214300000000	242940200000000	358038800000000	278337200000000	449007000000000	148575600000000	660705300000000	790234100000000	109634100000000	904604500000000	257934600000000	499642000000000	705489100000000	216408900000000	253862300000000	673921700000000
K00783	134526500000000	475788200000000	567018200000000	520099400000000	242820400000000	515685600000000	461932400000000	131575800000000	114134500000000	823563700000000	684338800000000	68428340000000	134846000000000	930742900000000	101439300000000	111312200000000	761380300000000	82354440000000	154611400000000	83610890000000	716567600000000	785947100000000	106022800000000	768642800000000	798896800000000	618009900000000	886563200000000	909541800000000	763725100000000	888594200000000	206386400000000	261318300000000	168107700000000	846131900000000	585196500000000	91395760000000	723198800000000	754223900000000	436254400000000	321138000000000	275680900000000	419856700000000	267838900000000	621800500000000	140638600000000	325033600000000	731636500000000	89223490000000	171411400000000
K00784	38942390000000	128958400000000	147580400000000	144052200000000	60347360000000	760993600000000	844158300000000	376461500000000	34926700000000	173466000000000	138083500000000	160909300000000	155963000000000	155643100000000	218917400000000	168873200000000	139190000000000	139056500000000	3924080000000	235456400000000	196615200000000	171728800000000	196367800000000	167743300000000	21907170000000	171515700000000	219208800000000	161206500000000	141295600000000	168245000000000	397109000000000	513218700000000	366188200000000	137708800000000	883774100000000	157696200000000	903746000000000	131698300000000	526972700000000	322917500000000	357520400000000	767688200000000	370885000000000	122850100000000	261481400000000	536668900000000	145286300000000	199853200000000	392559000000000
K00786	211869800000000	100688800000000	141175000000000	905067400000000	56330770000000	133456500000000	114549200000000	202468600000000	167806500000000	156748100000000	13223920000000	127168300000000	249082200000000	171116700000000	169218200000000	230145300000000	152534600000000	16135130000000	195243500000000	110694100000000	887269400000000	142267000000000	22056300000000	157094000000000	103793700000000	947135800000000	129826100000000	21187870000000	139018400000000	165806200000000	309214500000000	234777600000000	14529060000000	720475800000000	518419900000000	820815600000000	190521500000000	167483100000000	17909570000000	100981000000000	766497100000000	957232800000000	215766900000000	70355750000000	131169700000000	879044400000000	938855300000000	621537700000000	159166300000000
K00788	427250600000000	143690600000000	200506500000000	164291500000000	882309000000000	171062500000000	974897500000000	406118400000000	343888700000000	244727600000000	192610000000000	191001400000000	311915200000000	246935100000000	277813200000000	275039100000000	193000300000000	232286700000000	426847000000000	2292484000000	202868700000000	214554000000000	309870800000000	225506500000000	231944900000000	1928275000000	231611800000000	266230600000000	212502900000000	240034600000000	526469600000000	593978400000000	372190700000000	234721200000000	131751500000000	207785200000000	181008300000000	188681000000000	131701400000000	442369800000000	941760500000000	827153600000000	506782900000000	143424500000000	28940730000000	767794200000000	200779600000000	240076800000000	41083620000000
K00789	861154600000000	275967500000000	392651500000000	312463700000000	123255300000000	278581200000000	215768200000000	798823800000000	702693600000000	446236400000000	353730800000000	336276800000000	517591700000000	45509270000000	552868100000000	510912500000000	344860900000000	407335400000000	85777100000000	475923500000000	412337300000000	414831500000000	548786800000000	422753300000000	464607400000000	375917200000000	516173400000000	476221500000000	3634245000000	421284600000000	125299900000000	15165770000000	85309260000000	548817700000000	337435500000000	654993800000000	369537600000000	46585900000000	286160000000000	226319300000000	271912200000000	385654200000000	112570000000000	296694700000000	665692400000000	138931000000000	546132100000000	517496600000000	100068100000000
K00790	836514800000000	343814500000000	384436300000000	303933600000000	14557870000000	302920200000000	249169000000000	785495500000000	695176800000000	498742200000000	400435000000000	404860400000000	677651700000000	553548900000000	592092800000000	583394100000000	443645800000000	436335100000000	870990300000000	498831000000000	417552700000000	473312100000000	623260100000000	47684900000000	465298400000000	38092940000000	513585200000000	523788800000000	437432500000000	506731900000000	110964500000000	135946600000000	815012400000000	485996600000000	262181000000000	487764900000000	287177000000000	360115800000000	216312700000000	113633700000000	152775600000000	185342100000000	118414900000000	305585700000000	626112900000000	135595800000000	400279500000000	510243900000000	101178800000000
K00791	339930700000000	127851600000000	146559500000000	836674900000000	523821200000000	140815200000000	958482300000000	3152960000000	282499600000000	174733200000000	147267500000000	149323700000000	273662900000000	208073200000000	222171600000000	210809000000000	137177700000000	157060200000000	342305500000000	186472300000000	153686200000000	16648740000000	235370600000000	168974400000000	185532900000000	14433220000000	197229400000000	200010800000000	15496110000000	169799200000000	478750000000000	634753300000000	423028600000000	274898400000000	131223500000000	256749500000000	183144200000000	220034400000000	983246100000000	711620100000000	844820500000000	94480670000000	542826000000000	154072800000000	376875200000000	771427800000000	207503700000000	274997800000000	555300000000000
K00793	174366300000000	39708830000000	585998200000000	433875100000000	219097800000000	320195000000000	293045500000000	160324800000000	150083800000000	636218800000000	49396110000000	491145700000000	720349200000000	518981000000000	949186500000000	664392800000000	404189700000000	572080100000000	177055700000000	985302400000000	875268700000000	632058700000000	789950400000000	595007600000000	961022600000000	809783100000000	105374500000000	613400000000000	520544300000000	611286400000000	239475000000000	253562800000000	152151500000000	624918600000000	387244600000000	697498500000000	464082000000000	704832600000000	235132700000000	199477300000000	161599700000000	363348600000000	18089930000000	604610200000000	124832700000000	270492400000000	638872100000000	752668400000000	208769700000000
K00794	823532400000000	205717100000000	264440300000000	211057500000000	100965000000000	184127700000000	132097000000000	809889600000000	731999300000000	313086900000000	240317600000000	303215200000000	373899100000000	308367900000000	508120900000000	302686700000000	265488600000000	302770400000000	891134600000000	472967900000000	49515390000000	327697100000000	398497300000000	312749000000000	507896100000000	385621500000000	519270500000000	344219100000000	293076100000000	360985500000000	139492300000000	129323200000000	115624800000000	497781500000000	319512700000000	559129100000000	12511040000000	355077000000000	152006700000000	85	6	139126100000000	125621700000000	400606800000000	922664000000000	17553760000000	334641800000000	748316700000000	148345200000000
K00795	285418800000000	903951100000000	10896680000000	865320600000000	35715780000000	634906900000000	696932000000000	258763000000000	243829800000000	136218300000000	116810200000000	110383900000000	149796900000000	133836000000000	174048900000000	138754800000000	102098200000000	118743700000000	295678700000000	155293900000000	136739200000000	14798270000000	157353800000000	140388900000000	154702700000000	126154600000000	179566900000000	13503090000000	115561100000000	148843600000000	381092900000000	428174900000000	205674100000000	138272100000000	757870200000000	140459600000000	399548600000000	730825800000000	409644500000000	329248300000000	445956700000000	623514600000000	223474200000000	527052200000000	119465900000000	409280200000000	135585000000000	165832100000000	213233100000000
K00796	426514800000000	1890845000000	234932400000000	140843300000000	750689900000000	233745200000000	120005700000000	456199300000000	357228400000000	267492600000000	216439800000000	213241400000000	494153200000000	406426000000000	348565100000000	391228800000000	29935680000000	256237100000000	43442720000000	240344000000000	20363480000000	206016300000000	356137400000000	232804600000000	23971150000000	20109530000000	258127600000000	331491400000000	234170800000000	275935700000000	60363920000000	737230400000000	437979400000000	118136300000000	847458600000000	109910700000000	261457600000000	205258500000000	185778400000000	112268700000000	748200000000000	869041900000000	650097900000000	194348400000000	362603400000000	168581800000000	11426410000000	885154300000000	495137300000
K00797	216214700000000	720886300000000	835865500000000	822625500000000	390793000000000	541878800000000	769539400000000	202489100000000	184342100000000	1139874000000	834170100000000	866078500000000	144642600000000	128212200000000	138211300000000	129432900000000	979855800000000	963740300000000	220500500000000	134517300000000	114384100000000	117724300000000	147545300000000	104923300000000	119338300000000	101817700000000	131827800000000	119544700000000	880779700000000	11861990000000	395900300000000	284954400000000	124467100000000	97148950000000	784054800000000	992892300000000	718109700000000	102077100000000	333530300000000	257446900000000	441457700000000	577116800000000	171644900000000	457790600000000	917306900000000	506899500000000	122361600000000	209851200000000	162802100000000
K00798	572403900000000	28020690000000	407212200000000	539062900000000	220776100000000	145973700000000	175485000000000	503968100000000	48116340000000	274265500000000	218130000000000	268539600000000	264699200000000	226674600000000	520010500000000	365495400000000	230473700000000	295289600000000	513533700000000	333808300000000	314770600000000	27736020000000	259647300000000	253981900000000	399369600000000	266376800000000	38808530000000	267469000000000	247988100000000	287168800000000	160313100000000	172526100000000	138194800000000	261189100000000	168470500000000	274604100000000	541907700000000	731449300000000	392885200000000	243194700000000	222039100000000	296523600000000	160529600000000	429848800000000	158380100000000	219878400000000	197783200000000	958369200000000	167698000000000
K00799	2	0	0	0	728158500000000	65	0	0	0	5	3	3	0	4	2	4	15	233333300000000	15	0	2	4	85062890000000	55	133333300000000	0	1	0	343848400000000	5	615154600000000	179017800000000	917018200000000	25	123730100000000	309887800000000	831883500000000	100529700000000	575087700000000	784368700000000	921990500000000	160145700000000	313653100000000	55	195	235	28	105	965149400000000
K00800	88127510000000	325880700000000	3651707000000	26329120000000	134168000000000	292914100000000	238367800000000	847668700000000	731182500000000	465490500000000	384124500000000	377742800000000	643021600000000	546568900000000	562017100000000	560564600000000	387093600000000	42465980000000	918686900000000	493339400000000	411390600000000	419244700000	599223400000000	433547100000000	468196500000000	393747700000000	54371740000000	509998900000000	410695500000000	468191800000000	130830800000000	158987900000000	9523516000000	483123200000000	29854760000000	518612300000000	300272400000000	436077500000000	205700100000000	152380100000000	136556700000000	252571700000000	134574800000000	354114900000000	739914000000000	168965200000000	461870800000000	625791700000000	124951200000000
K00801	12715540000000	4	260213900000000	958528800000000	371620000000000	25	1	339033500000000	275328100000000	399328000000000	0	25	29131640000000	353914800000000	238469200000000	912695100000000	120318200000000	44019800000000	45259590000000	179308300000000	362827700000000	15	133492400000000	65333040000000	1306142000000	169684000000000	226217600000000	912607600000000	30725610000000	45	799384600000000	187816900000000	698337000000000	555987600000000	761311700000000	335716900000000	2	0	229274300000000	682583200000000	632649100000000	601022900000000	969914000000000	35	778423200000000	600649900000000	232661300000000	3	3
K00803	205054900000000	354051100000000	166115800000000	932130100000000	155711400000000	917271200000000	812696600000000	203132700000000	156877800000000	140256100000000	111201000000000	122204800000000	295733300000000	232168700000000	235975800000000	123769900000000	106545700000000	120919400000000	268357600000000	113608700000000	888733100000000	133716000000000	15023620000000	149999100000000	108539400000000	878492700000000	120100700000000	125015400000000	106256600000000	140276300000000	134961300000000	956104800000000	472088500000000	8	25	55	10	17133260000000	45	0	0	0	419118800000000	1	262380400000000	19	35	883333300000000	438176700000000
K00805	139986100000000	475440400000000	480005600000000	444918000000000	142713600000000	2963346000000	263082700000000	130403100000000	12398480000000	604203400000000	468572100000000	537195000000000	795867800000000	655226900000000	832410900000000	584328200000000	427194100000000	532471200000000	159587800000000	916628900000000	869818900000000	575192800000000	72666510000000	598219100000000	91682110000000	655862500000000	84719060000000	53136760000000	567364400000000	614150900000000	378705800000000	433377300000000	295521200000000	972571600000000	607237300000000	100390000000000	725118400000000	107949400000000	564107300000000	287472400000000	361375000000000	498832900000000	349901400000000	942729900000000	249541300000000	371677100000000	875513600000000	115294000000000	399378300000000
K00806	24908080000000	987944100000000	107532600000000	938484600000000	470321900000000	101175900000000	817685800000000	242758300000000	220914500000000	144893700000000	115091000000000	116211700000000	216228000000000	16295660000000	189269800000000	169202800000000	11798610000000	134639900000000	271821000000000	157732300000000	130079900000000	138883100000000	181113200000000	143389300000000	151501100000000	12194770000000	161771000000000	167300400000000	132274900000000	145747600000000	351385200000000	447532200000000	277083200000000	14907140000000	832960700000000	143993200000000	100788000000000	125085600000000	495077800000000	45830200000000	560310200000000	657337100000000	33400330000000	894283400000000	197258500000000	516200500000000	129740000000000	200270600000000	343175400000000
K00808	0	0	0	0	0	0	0	0	0	0	0	0	0	0	0	0	0	0	0	0	2	0	0	0	0	0	0	0	0	0	6	7	2	0	0	0	1	25	0	0	0	0	7	0	4	0	0	0	5
K00809	1	6	0	0	0	45359480000000	1	4	7	3	1	5	1	0	0	342857100000000	4	4	12	1	1	0	8	0	0	0	0	0	4	2	1	0	0	5	0	0	0	0	0	0	0	0	0	1	0	1	0	1	0
K00812	509864600000000	182517000000000	19330150000000	10099110000000	718898500000000	185231100000000	118017100000000	468029400000000	420125900000000	227092800000000	199773300000000	189052600000000	307255100000000	24955410000000	274031200000000	266157700000000	184497000000000	19643150000000	51093430000000	275281800000000	236938900000000	224258100000000	293566000000000	224315100000000	264345400000000	211709500000000	296298600000000	262391600000000	187859100000000	227264700000000	748685300000000	104451300000000	724000800000000	330908900000000	194805500000000	405999700000000	184437200000000	287307800000000	141085700000000	647597400000000	106283600000000	1128779000000	839039900000000	25548760000000	591132200000000	120352000000000	29655580000000	441410800000000	837729800000000
K00813	210874700000000	752357500000000	23825910000000	271839300000000	116383500000000	208473400000000	29335900000000	166684900000000	180522300000000	750077400000000	627126000000000	701289000000000	176304500000000	120511900000000	101800100000000	943884700000000	10672400000000	561507200000000	236499600000000	999368400000000	150889200000000	69135490000000	887620500000000	631771300000000	128655900000000	100953400000000	101158800000000	506784200000000	774861100000000	74721010000000	214358000000000	144849500000000	682168900000000	458656000000000	420747600000000	450472100000000	608425800000000	850253700000000	423648900000000	392644900000000	637984500000000	90311280000000	801156500000000	220194500000000	422038700000000	388555400000000	804078100000000	129415400000000	108910800000000
K00814	293196600000000	102777900000000	208550600000000	111570700000000	587233100000000	147756100000000	850789900000000	271608000000000	233302700000000	187177400000000	156211300000000	14726960000000	199998800000000	132502100000000	218792100000000	223698000000000	111258100000000	157388500000000	275965900000000	150073500000000	14140320000000	152433300000000	22107140000000	159122600000000	165807500000000	125793500000000	154518300000000	199975900000000	156484000000000	179318800000000	252601000000000	298104600000000	100376800000000	693171900000000	521810000000000	773054600000000	702418300000000	550444400000000	599194900000000	322730100000000	305066300000000	690810800000000	153599700000000	508288500000000	825149000000000	322765500000000	998721900000000	128175200000000	121343300000000
K00817	637672800000000	235790100000000	28444150000000	215753300000000	111255200000000	272911700000000	194894600000000	629832900000000	540538900000000	387192900000000	313229900000000	311074400000000	553462900000000	487454800000000	452581900000000	469591100000000	342876700000000	366017400000000	66911860000000	362509500000000	308080600000000	340228000000000	523773600000000	353125700000000	357807100000000	288821700000000	383340900000000	454423700000000	341495600000000	394087100000000	122282200000000	12584570000000	85290290000000	504394000000000	291913800000000	483484600000000	350031500000000	420466500000000	228852800000000	193595300000000	204246100000000	256368300000000	10958430000000	332717200000000	654148500000000	161644800000000	463614300000000	632398500000000	105383800000000
K00819	140253700000000	822732500000000	278525200000000	35	0	251217100000000	15	133101200000000	112049600000000	58448280000000	124838700000000	579452100000000	480534800000000	632364000000000	367076400000000	0	1	0	12780980000000	742392200000000	605987200000000	95	14	7	669349100000000	791974900000000	733494000000000	983333300000000	3	2	531659200000000	684664100000000	100986900000000	216442700000000	7	183257100000000	315908200000000	559370300000000	349737200000000	6	823665900000000	771752200000000	139253400000000	284705600000000	139781300000000	862592500000000	9	26675640000000	893595300000000
K00820	860547600000000	323607200000000	410325100000000	29484530000000	161916700000000	342828100000000	256419400000000	801452200000000	704398400000000	518554200000000	429387100000000	408278100000000	671775000000000	537938800000000	587154500000000	60595180000000	408851100000000	474895900000000	853615200000000	489716500000000	446566700000000	462882300000000	628882000000000	489451900000000	466812300000000	377217400000000	510061600000000	551962500000000	442821900000000	523580500000000	118973500000000	140451300000000	86620130000000	456605700000000	288428700000000	518844700000000	281095400000000	350421400000000	193918900000000	121868400000000	133635300000000	21125540000000	100983400000000	302697900000000	565315800000000	143866300000000	438684400000000	576438700000000	939611800000000
K00821	82428170000000	26493410000000	389385300000000	284392700000000	121740500000000	273075400000000	174005600000000	757010700000000	646326000000000	380166400000000	311106900000000	306331300000000	479290500000000	432077600000000	484072000000000	447796800000000	285662500000000	338992900000000	752374100000000	420313100000000	369996300000000	344344700000000	473545800000000	371702100000000	446294500000000	35267370000000	461068000000000	405537400000000	312716900000000	374670800000000	12109970000000	118412200000000	917100300000000	357078900000000	215547000000000	376865100000000	26584190000000	386243100000000	258690800000000	140345800000000	143006000000000	194834400000000	101623600000000	306800000000000	685809400000000	120209600000000	322851800000000	422262600000000	996956300000000
K00822	0	0	0	0	0	0	0	0	0	0	0	0	0	0	0	0	0	0	0	0	0	0	0	0	0	0	0	0	0	0	170557400000000	329540500000000	102792900000000	0	0	0	200091200000000	114760800000000	1	0	0	0	0	0	0	0	0	0	161138200000000
K00823	524535000000000	658620900000000	211106800000000	404733600000000	374376900000000	865913200000000	104069700000000	520087000000000	416773100000000	247676100000000	201290100000000	213929500000000	397547500000000	245367500000000	390663200000000	209825300000000	162967300000000	148910500000000	529093300000000	267308800000000	251327900000000	293113300000000	232881500000000	241579300000000	321343500000000	245052700000000	268388300000000	212118500000000	185356200000000	24608660000000	195198500000000	124610600000000	751629700000000	103257100000000	101227000000000	215	449688200000000	409498600000000	355431200000000	264726400000000	247261900000000	616355400000000	816186700000000	155	410743000000000	522182000000000	109720200000000	238091300000000	948357800000000
K00824	407256900000000	135020900000000	201501000000000	300247400000000	70306340000000	127215800000000	34159700000000	437980000000000	379233800000000	250565600000000	202779000000000	213888300000000	507628600000000	357369200000000	367978600000000	387500600000000	241261200000000	26545960000000	52863370000000	25882410000000	24892170000000	284823500000000	397211000000000	277098800000000	210152400000000	155795100000000	271647900000000	326739500000000	218247900000000	28387690000000	100374500000000	671804300000000	632155900000000	232305000000000	148053500000000	217581700000000	169886400000000	383525700000000	181035100000000	111512900000000	124538800000000	333065500000000	775210500000000	108915300000000	349511300000000	777607400000000	274162700000000	34737600000000	693219700000000
K00826	525424900000000	232962200000000	304642300000000	154679200000000	92269680000000	242176500000000	170490200000000	502387600000000	440825000000000	314376000000000	255417800000000	246208700000000	44752590000000	339833100000000	3767243000000	398178300000000	226673800000000	278882400000000	492213600000000	280644800000000	256563800000000	258339900000000	378895900000000	28308780000000	302017200000000	238720100000000	3057019000000	336267000000000	265904700000000	318624700000000	733335200000000	820749800000000	454483900000000	264913000000000	130469500000000	236777300000000	227509300000000	278612200000000	132883200000000	706626500000000	948613400000000	137754400000000	627104300000000	175572900000000	382728100000000	785539200000000	250765900000000	279610200000000	576139600000000
K00830	46	124685200000000	242197500000000	4	0	1	7	295576400000000	375213600000000	18	165738000000000	987751200000000	4	55	197255200000000	14	63515690000000	19	65	29	158877200000000	136765500000000	125	9	257576700000000	201830800000000	14	15	185	19731110000000	632790900000000	107862300000000	351323200000000	958638400000000	4	437031000000000	137454500000000	18141700000000	185496000000000	117852800000000	16798960000000	269386100000000	209904200000000	75	131406000000000	13	651032800000000	534257700000000	257946800000000
K00831	440393000000000	185853400000000	230288000000000	149687400000000	871161000000000	201242200000000	140533600000000	430323900000000	386892100000000	278480600000000	222394000000000	217211800000000	38197410000000	302798500000000	31792730000000	347520500000000	216712300000000	24980000000000	44065330000000	248791800000000	219799200000000	238702700000000	32829550000000	258183500000000	251554500000000	208356200000000	261845600000000	289812900000000	230937600000000	269199200000000	505469400000000	70350220000000	402691000000000	221187400000000	137840100000000	237336900000000	172237400000000	213815100000000	12946030000000	581575600000000	724480200000000	114331200000000	580873500000000	189258300000000	323306900000000	79755420000000	224295700000000	326923400000000	486721700000000
K00832	548900900000000	293144600000000	292913100000000	441839300000000	150761100000000	352390700000000	184586200000000	558760600000000	448073100000000	367562100000000	344235400000000	320493500000000	698060400000000	511663900000000	348633400000000	541140400000000	411587600000000	340114700000000	50604250000000	236262500000000	297944100000000	283317900000000	450596200000000	329870600000000	286776800000000	241422900000000	28413660000000	513322800000000	330525100000000	371789400000000	227715100000000	171015600000000	819860800000000	573656000000000	465747600000000	49772950000000	79579250000000	943915900000000	518648900000000	442644900000000	687984500000000	93811280000000	106115700000000	320194500000000	475700900000000	46150760000000	958923200000000	149415400000000	126410800000000
K00833	173714200000000	383533000000000	9114659000000	65204890000000	405883500000000	426202600000000	301786000000000	140217800000000	143779900000000	601421500000000	517719800000000	517530700000000	583958100000000	627651700000000	953790500000000	559144600000000	363417400000000	533409600000000	157594500000000	936545600000000	843118200000000	625141400000000	634604300000000	581809300000000	994419100000000	72121040000000	865364800000000	522581900000000	510845300000000	55219700000000	481383900000000	526049300000000	564988700000000	245867500000000	177065200000000	261329700000000	130706400000000	231485900000000	132304300000000	584871900000000	678579100000000	937958700000000	640779600000000	216098200000000	43741750000000	688626700000000	173678100000000	282461500000000	635967300000000
K00835	0	4	0	0	1	955980900000000	481450500000000	0	1	24	301533900000000	525607100000000	0	0	0	191575800000000	181834800000000	85	3	0	3	3526598000000	285838100000000	255075300000000	0	1	4	18138490000000	234072500000000	24	8	8	660820900000000	340982900000000	995620100000000	242365100000000	502944300000000	156558700000000	1	24209400000000	837141700000000	321345500000000	3	15	2	256197200000000	45	175316400000000	433333300000000
K00836	278955500000000	21481770000000	32221160000000	74194830000000	591687300000000	128850900000000	330645400000000	287798000000000	265888500000000	113516100000000	109468500000000	90213460000000	121847400000000	102390200000000	149400300000000	724645200000000	471216100000000	794779100000000	247061000000000	165632200000000	157638700000000	103901000000000	127005400000000	135123200000000	189694900000000	153231400000000	159890000000000	968813100000000	851881800000000	105528500000000	19361370000000	617000200000000	468813000000000	4	6	105	485954100000000	432897500000000	220554200000000	333118400000000	285	691509600000000	205	8	125	469323500000000	45	95	363743200000000
K00839	46	124685200000000	242197500000000	4	0	1	7	295576400000000	375213600000000	18	165738000000000	987751200000000	4	55	197255200000000	14	63515690000000	19	65	29	158877200000000	136765500000000	125	9	257576700000000	201830800000000	14	15	185	19731110000000	585892200000000	892252800000000	311323200000000	958638400000000	4	437031000000000	874545500000000	12141700000000	165496000000000	117852800000000	16798960000000	269386100000000	105	7	614060300000000	13	651032800000000	434257700000000	192754300000000
K00840	1	0	4	0	0	1	0	0	0	2	1	499304900000000	0	0	0	0	3	0	2	240621000000000	1	5	2	2	2	1	2	1	240621000000000	5	253216900000000	105917500000000	424710100000000	25	9	750645200000000	293123700000000	543665600000000	396215400000000	404327000000000	372440600000000	596852600000000	126148300000000	556076800000000	891790000000000	2	55	7	485465700000000
K00841	37755870000000	240535900000000	298442200000000	43188000000000	14612280000000	333543400000000	156250300000000	429061700000000	309073000000000	301382000000000	292022800000000	258472600000000	538247800000000	413969000000000	283262600000000	460120500000000	31288830000000	286860900000000	365252300000000	176280900000000	174098000000000	219682400000000	368834200000000	275296700000000	190272800000000	174010200000000	205970100000000	476212300000000	266321700000000	299401700000000	211537900000000	440468400000000	157691800000000	145	75	705907400000000	197366700000000	986622100000000	95	5	8	35	328333300000000	11	736622100000000	809521400000000	154845200000000	20	205
K00842	535296600000000	656987700000000	387917200000000	3	15	35	102300200000000	611294900000000	453045700000000	525765700000000	32152960000000	376508600000000	795888000000000	534074900000000	164161800000000	540681800000000	280429000000000	313067400000000	706198400000000	350715500000000	260559300000000	577899700000000	10260560000000	7259167000000	268049800000000	264814000000000	528854200000000	749518900000000	474424600000000	43447350000000	198163700000000	142649600000000	804647600000000	123113000000000	891153300000000	980709200000000	128831800000000	106574300000000	127876700000000	123464800000000	860142100000000	102280400000000	128727000000000	390962900000000	905306200000000	797809200000000	128155200000000	640387600000000	102572200000000
K00844	600413000000000	6	136488600000000	5	5	117822800000000	6	44953410000000	507924500000000	17	203363500000000	16	521024500000000	810348000000000	395163600000000	706881200000000	157035900000000	15	833957700000000	627981100000000	327881300000000	834219800000000	275902600000000	913142000000000	336442800000000	459600700000000	521689700000000	121112200000000	105	20	32	38	295814500000000	360299200000000	172834100000000	419507300000000	141053700000000	23	2	8	13	244233900000000	431014700000000	14	326231300000000	320386300000000	695524400000000	13773480000000	5148
K00845	987660000000000	386235100000000	51276810000000	348875400000000	19908560000000	413551900000000	272253600000000	953279200000000	816570500000000	561051900000000	472627800000000	464604600000000	907040100000000	639891200000000	725327800000000	720024300000000	486852200000000	531787100000000	99578340000000	561763500000000	466176100000000	506174000000000	720780700000000	528181400000000	547756500000000	441312100000000	61399020000000	635736800000000	496418700000000	572599700000000	29538720000000	254488000000000	164794800000000	125520100000000	86926770000000	120606000000000	141258900000000	127198500000000	130509400000000	106753000000000	913204500000000	103382500000000	244864000000000	755556600000000	146530800000000	233458700000000	131605900000000	975181100000000	190484500000000
K00846	0	0	0	0	0	0	0	0	0	0	0	0	0	0	0	0	0	0	0	0	0	0	0	0	0	0	0	0	0	0	213352500000000	169408600000000	465217400000000	0	0	0	161290300000000	0	0	0	0	0	0	0	0	0	0	0	133596800000000
K00847	555249400000000	182841700000000	234138600000000	161123500000000	846061400000000	207418600000000	126966700000000	538327200000000	472492300000000	283450900000000	23864630000000	241577100000000	342916800000000	286236500000000	359024300000000	323275700000000	23344060000000	249981200000000	607706400000000	34372530000000	275471400000000	268235500000000	357015000000000	264586100000000	324611800000000	259288300000000	344680600000000	322513400000000	258939800000000	291746800000000	289787600000000	234552300000000	142884300000000	166174300000000	104287700000000	148390400000000	140973000000000	13131750000000	144682500000000	146203700000000	138413900000000	158806400000000	219337800000000	685335700000000	13694620000000	193279200000000	166641500000000	107321100000000	172703500000000
K00848	452430900000000	155642900000000	165321200000000	16732260000000	886810700000000	120074700000000	100211100000000	436052300000000	404578300000000	220048700000000	183772100000000	159219400000000	229459300000000	190652100000000	267073700000000	206287200000000	130887800000000	172430500000000	476980700000000	279009300000000	267805400000000	214072200000000	2695309000000	225077600000000	272647600000000	224758800000000	270311600000000	212942100000000	179846800000000	200268700000000	349115100000000	287544600000000	189622500000000	888301800000000	626561900000000	943974600000000	191663600000000	182197600000000	188784700000000	852212200000000	787153000000000	845721300000000	279269700000000	877360700000000	188518900000000	146297400000000	838159600000000	679257900000000	23696760000000
K00849	562281200000000	209231200000000	230672400000000	18872940000000	925328700000000	199605700000000	156869900000000	532177400000000	461919500000000	30401650000000	241662000000000	246201400000000	462252700000000	35992600000000	401730800000000	38380960000000	256026100000000	28713690000000	585567700000000	315731300000000	273589400000000	298034400000000	403026300000000	292929400000000	315644900000000	250300400000000	344907900000000	341068000000000	270313300000000	318990600000000	616079500000000	747228600000000	427994800000000	222530100000000	151051700000000	252108600000000	189962700000000	206367200000000	140385900000000	866308500000000	761506300000000	136814000000000	629263700000000	143019100000000	349017100000000	706978600000000	228944300000000	287695900000000	556888400000000
K00850	121309600000000	421938300000000	526034600000000	466368100000000	207812000000000	336733900000000	31348110000000	115010300000000	103887000000000	603934900000000	500621200000000	479290200000000	638206600000000	532261600000000	75665150000000	643453500000000	431761800000000	537989200000000	122140000000000	717758200000000	626197100000000	605375400000000	702011800000000	590512600000000	701065400000000	543232900000000	740864700000000	594595600000000	499726300000000	606654900000000	140762600000000	176046600000000	111728600000000	507716700000000	381557400000000	571178400000000	234104700000000	457858300000000	227264200000000	117952800000000	154362000000000	204865300000000	129351400000000	356234700000000	903851100000000	184840900000000	452711400000000	594472400000000	136840600000000
K00851	948297000000000	574708000000000	101917900000000	716913900000000	443868300000000	74439890000000	544138500000000	899114600000000	756853700000000	787530500000000	719370100000000	673343900000000	147435200000000	887423800000000	988471800000000	138575300000000	742710900000000	898411100000000	911291600000000	50567190000000	460370400000000	581151100000000	107327300000000	736142900000000	544027900000000	457778300000000	611063300000000	999364600000000	747322900000000	91560680000000	377242000000000	360186900000000	152879300000000	15063140000000	12947080000000	161772300000000	191431000000000	128482400000000	114753800000000	118145200000000	243086100000000	231767800000000	222357800000000	675351200000000	160730500000000	483704200000000	226891500000000	230090200000000	194077200000000
K00852	326198100000000	118843600000000	158211300000000	169258600000000	732891200000000	193247800000000	107936500000000	339469400000000	292210700000000	236240900000000	19119100000000	203357500000000	391940900000000	306969400000000	277422100000000	304062900000000	242116400000000	242356100000000	365261400000000	200102900000000	171280500000000	214298500000000	32389290000000	226574200000000	188412400000000	164149300000000	208019300000000	28518720000000	21205640000000	243137900000000	484688300000000	388421700000000	228139400000000	236071200000000	142547200000000	192423800000000	278920800000000	229798700000000	258462700000000	196670100000000	263603300000000	294998900000000	330053200000000	967092200000000	234910800000000	271944300000000	253286100000000	178864100000000	289959200000000
K00853	140601800000000	52049140000000	977472300000000	691593200000000	241465400000000	117368500000000	728855400000000	141712800000000	112992100000000	120915800000000	912765200000000	914268700000000	218706200000000	179254800000000	149084700000000	183062100000000	135916300000000	116992600000000	13454410000000	732903500000000	522783400000000	85759050000000	180696000000000	10703060000000	754836800000000	638485900000000	877520900000000	149202500000000	999823000000000	119668300000000	272755400000000	285096900000000	276221900000000	106886400000000	714788900000000	1187951000000	111427900000000	129364900000000	929065400000000	671113300000000	604223300000000	700663300000000	320283500000000	980954500000000	178266000000000	348481000000000	913020500000000	1607416000000	341258900000000
K00854	81500830000000	282785900000000	468118700000000	383355100000000	188292200000000	330869000000000	255733700000000	819137000000000	709714500000000	512595700000000	418025900000000	396929700000000	633480500000000	548280800000000	6796720000000	645611900000000	442492100000000	466304600000000	861676800000000	491000600000000	448004700000000	448269100000000	638417900000000	448217500000000	50245650000000	407570400000000	481673200000000	561824300000000	422854900000000	500292900000000	559886600000000	450374800000000	276181300000000	170838300000000	113525400000000	184280800000000	304201000000000	273887800000000	298326700000000	1701694000000	166231500000000	179931100000000	39484250000000	131142700000000	258951600000000	304175900000000	199448200000000	154957500000000	339778600000000
K00855	0	0	0	0	0	0	0	0	0	0	0	0	0	0	0	0	0	0	0	0	0	0	0	0	0	0	0	0	0	0	210304100000000	117979300000000	853036400000000	0	0	1	55	10746170000000	771734900000000	804200100000000	8	17	1	0	333333300000000	5	1	2	6
K00856	191864800000000	619444800000000	260820100000000	268726500000000	703654900000000	566848200000000	803308100000000	228658300000000	192846500000000	596588500000000	556698000000000	60761130000000	48789490000000	389024400000000	738935100000000	286488200000000	253619000000000	280182400000000	193560100000000	13084060000000	129666600000000	726088100000000	656379400000000	559909400000000	124132100000000	102896600000000	949218800000000	571125400000000	494250200000000	641846700000000	123755500000000	133826600000000	140909500000000	718121100000000	380338200000000	612603900000000	330638300000000	675386900000000	294810900000000	180636400000000	221482400000000	49364690000000	119301400000000	384476400000000	101581000000000	177245400000000	368637100000000	646002500000000	136552800000000
K00857	269346000000000	715617000000000	503106300000000	388219500000000	969016900000000	926588100000000	396449700000000	260244200000000	238800400000000	517007800000000	438430500000000	441226800000000	768836600000000	655638800000000	666564800000000	438043100000000	360254800000000	347758800000000	258833800000000	1512449000000	138093400000000	578474600000000	685514900000000	621004700000000	151495800000000	13582000000000	164465200000000	58210740000000	429421300000000	535399100000000	166569300000000	202998000000000	205222200000000	834894600000000	623114300000000	964065300000000	655821400000000	103796200000000	409821200000000	694696700000000	106348300000000	193855700000000	247897600000000	760137900000000	185980100000000	214392500000000	403271000000000	774133700000000	265872900000000
K00858	32782520000000	126657300000000	151145800000000	969484400000000	483915400000000	131618900000000	977399000000000	323536600000000	278492500000000	197738300000000	157496200000000	149443800000000	275113800000000	201817100000000	220771000000000	218127400000000	155702500000000	16422470000000	316909700000000	184115200000000	158468800000000	183270000000000	233467200000000	187721100000000	184000600000000	141438300000000	194982700000000	210529800000000	163436700000000	185496500000000	484709600000000	553449800000000	365141200000000	184469300000000	101162100000000	192096300000000	11119430000000	149249500000000	891954800000000	619867300000000	593197300000000	734712700000000	497654900000000	166948200000000	318845900000000	638724100000000	159607300000000	219034900000000	436826600000000
K00859	468711700000000	18450230000000	141508200000000	106253700000000	561020300000000	118955100000000	938498500000000	447812100000000	38946560000000	193976100000000	176940600000000	15922870000000	301242800000000	217935500000000	262492000000000	217266400000000	171014000000000	1693837000000	472681500000000	25783190000000	216276400000000	186957400000000	24549280000000	187578700000000	245038100000000	20001890000000	276299600000000	222363700000000	174121500000000	199949300000000	517819100000000	816878700000000	355426900000000	193574700000000	121443200000000	198704000000000	114760300000000	143597400000000	540255400000000	377238700000000	580453900000000	91574460000000	501537800000000	115969800000000	275322700000000	660278100000000	161879100000000	250019000000000	421931100000000
K00860	340740800000000	895041200000000	173831100000000	22030780000000	743445900000000	898210900000000	866155100000000	331114800000000	28203180000000	215402000000000	167893800000000	156208700000000	130871300000000	105438800000000	245172600000000	220631200000000	137220500000000	168478200000000	36032000000000	23392270000000	198590100000000	217929300000000	182088500000000	220271000000000	214645600000000	177224400000000	171928400000000	177498100000000	194896800000000	185174200000000	25703790000000	174491200000000	807520600000000	297328200000000	125955800000000	357928900000000	253942000000000	480789900000000	159651700000000	104536500000000	197025400000000	169346900000000	909324800000000	242047900000000	755011500000000	107275000000000	200855000000000	341632100000000	102448300000000
K00862	7	3	2	0	11	0	695972300000000	463453800000000	75757070000000	210944200000000	109591700000000	273385000000000	4	5	564730300000000	179620900000000	271812900000000	225160200000000	108775000000000	0	2	16	161425600000000	174898900000000	23135940000000	5	1	218692300000000	150100700000000	15	869187000000000	10	2	5	65	65	5	246947100000000	318115200000000	887606900000000	137450700000000	126886700000000	0	1	1	7	25	7	55
K00863	107211500000000	475943700000000	533007900000000	447499400000000	32514680000000	359475900000000	319602100000000	961176000000000	858599600000000	631504900000000	542393400000000	533349900000000	833410100000000	703382300000000	775300200000000	923112000000000	700072800000000	689975700000000	987048000000000	57203470000000	486228100000000	53838710000000	814543500000000	53213610000000	568450900000000	411318000000000	550171100000000	74430820000000	573492100000000	660925700000000	217855500000000	2616869000000	165378100000000	985420800000000	491413200000000	780293900000000	753799000000000	11323080000000	613795500000000	731962800000000	805338400000000	908219400000000	167168000000000	399452500000000	937657300000000	112420900000000	924278400000000	706565200000000	117957800000000
K00864	684832700000000	22303460000000	305197200000000	260671500000000	122074200000000	166216300000000	173466300000000	656269700000000	566254500000000	335237100000000	272441700000000	269886300000000	468613600000000	397027400000000	446150900000000	370139900000000	256053000000000	291082400000000	705536300000000	392211500000000	331475700000000	30824070000000	412634500000000	320608300000000	374879400000000	301224200000000	418586800000000	352345000000000	277046900000000	331510100000000	118093400000000	110614100000000	622350200000000	266913300000000	158087500000000	269083000000000	19521610000000	302182600000000	127887100000000	101920200000000	125241800000000	145474000000000	708330200000000	223938200000000	466816400000000	110272000000000	331887400000000	430906300000000	765325700000000
K00865	379396200000000	144658500000000	211535400000000	133383700000000	76810800000000	129779100000000	890991800000000	376861800000000	309922600000000	192704300000000	163498400000000	157711800000000	297233100000000	216369000000000	276252600000000	259364900000000	191099400000000	190292900000000	367947400000000	199431200000000	176152300000000	173709700000000	259150900000000	185225700000000	201521700000000	163454200000000	21320210000000	240928200000000	172016300000000	207444900000000	523263000000000	589732800000000	327594500000000	871143700000000	534146300000000	752329200000000	159165500000000	179471100000000	119873700000000	70017300000000	652566800000000	715779200000000	506021700000000	134615900000000	234334200000000	133557200000000	864076300000000	647134900000000	400704500000000
K00867	123943600000000	10	155141100000000	128796700000000	0	95722960000000	5	205	133679600000000	6	8	75	145243000000000	846146000000000	277999300000000	85	5	6	187607300000000	163868300000000	168845100000000	8	4	338888900000000	12	113888900000000	10	3	3	338888900000000	194784400000000	175383000000000	65	256	0	5	7	4	8	3	664914100000000	13861740000000	2	2	7	1	3	2	13
K00868	355487700000000	133571800000000	185101800000000	105717100000000	659954300000000	148196100000000	105536300000000	334433300000000	313284800000000	202258400000000	165671800000000	168102800000000	308151900000000	229884000000000	270559400000000	255812800000000	174979100000000	189668900000000	360639900000000	204941100000000	181485500000000	183467900000000	269040000000000	199130100000000	196314200000000	154618400000000	218125000000000	23706440000000	176845100000000	205012600000000	547475600000000	666406600000000	348836300000000	220340500000000	139804300000000	217388700000000	133154500000000	195542900000000	955731600000000	558388100000000	726089100000000	909905400000000	478633400000000	166056900000000	229510900000000	745268500000000	20943990000000	273689100000000	431879300000000
K00869	109085600000000	651869200000000	731917900000000	769299500000000	101666700000000	4	1015625	759407100000000	983710400000000	330898400000000	222381600000000	247532400000000	36219450000000	308680300000000	998005400000000	283120800000000	195321700000000	19147000000000	963494000000000	666803800000000	666370200000000	311980400000000	201500800000000	278664500000000	632672700000000	499055600000000	54869330000000	114983300000000	264869400000000	187506000000000	37076910000000	374099100000000	118438100000000	3	526510100000000	407210000000000	216666700000000	15	5	0	0	5	815352100000000	3	231666700000000	899167200000000	3	400746400000000	905702300000000
K00872	176358800000000	794160700000000	100807700000000	434048300000000	310483900000000	10748080000000	720080600000000	177646800000000	136852000000000	119875400000000	939542100000000	910120400000000	25149760000000	215430200000000	159104800000000	189207200000000	140247900000000	11988210000000	166616400000000	963168700000000	641897800000000	869805600000000	178649400000000	11187820000000	889327100000000	869853500000000	114218300000000	156127400000000	102778800000000	113734400000000	199441400000000	228123900000000	121218700000000	748203900000000	36473580000000	964221700000000	113040500000000	926509400000000	805552900000000	426777000000000	263813400000000	533171800000000	211848700000000	483992300000000	943214400000000	346597500000000	117997000000000	137296000000000	15804020000000
K00873	693214700000000	237326400000000	313713800000000	202694100000	105790000000000	265963600000000	176511600000000	65111710000000	57154490000000	393714800000000	305692300000000	320283000000000	502527200000000	388057300000000	453930600000000	448168000000000	290120000000000	344758000000000	684779100000000	387896900000000	333490700000000	353950700000000	470282300000000	365895400000000	37350050000000	306222300000000	419464800000000	435271300000000	338155200000000	393858700000000	105800700000000	121983800000000	850968100000000	380830400000000	220662100000000	396613300000000	220395900000000	301366000000000	145469100000000	100577000000000	119552100000000	138678600000000	871224800000000	262645300000000	549850400000000	137570700000000	329250000000000	544132000000000	903931300000000
K00874	45126190000000	188160900000000	799963200000000	175763500000000	657417000000000	12394750000000	12307630000000	398973900000000	389092400000000	228673800000000	177286000000000	172729100000000	38566850000000	277086200000000	287550500000000	25498530000000	199873700000000	19363890000000	464770100000000	254691000000000	207437400000000	22406890000000	297017100000000	227446400000000	236426200000000	201004700000000	297785500000000	243861300000000	185870400000000	232295800000000	183862500000000	181744600000000	103407300000000	102555200000000	664726000000000	903090300000000	724180000000000	748905800000000	674629700000000	803532900000000	950570100000000	112140100000000	14305460000000	426795800000000	942265500000000	162382200000000	107517900000000	84055760000000	130258800000000
K00875	0	0	0	0	0	0	0	1	2	0	0	0	0	1	0	0	0	0	2	0	6	0	0	0	1	4	1	0	0	0	316693900000000	18	127610600000000	1	0	248262500000000	518078700000000	156018200000000	481185600000000	126730900000000	216887600000000	330034400000000	976687100000000	0	3	1	2	0	114140400000000
K00876	58185130000000	186093000000000	236997200000000	181076000000000	775829100000000	130234700000000	139089600000000	533701200000000	495407000000000	243370700000000	19767130000000	178978200000000	348728600000000	299028700000000	338231100000000	238610100000000	172242900000000	207415700000000	586697700000000	346472500000000	282933400000000	241671800000000	302244600000000	235031800000000	307628200000000	23940540000000	35272930000000	246191200000000	19483670000000	242084200000000	808101700000000	100944500000000	634762000000000	244488700000000	167074000000000	277357800000000	153551100000000	234510900000000	106148000000000	432265500000000	873366900000000	945642400000000	903034300000000	221227700000000	462624100000000	936486200000000	246430100000000	372813300000000	816433900000000
K00878	412788800000000	153458300000000	239876500000000	137411500000000	656144100000000	195254000000000	141467100000000	392513400000000	331461600000000	25519940000000	208915800000000	192842000000000	388698400000000	292664100000000	304226200000000	349406200000000	234918700000000	253533200000000	402951900000000	217119400000000	184346600000000	220023500000000	358026100000000	242158900000000	218918500000000	184652700000000	244284400000000	298800600000000	221527400000000	258588800000000	443455400000000	491593100000000	258766700000000	152871200000000	858359400000000	130865700000000	130943800000000	136215800000000	121958200000000	647850000000000	625018100000000	105760900000000	419796600000000	118267700000000	176058600000000	757049000000000	178241300000000	286349100000000	298139200000000
K00879	474512800000000	223290700000000	205386100000000	362068700000000	11469110000000	314351600000000	136914000000000	470483900000000	439253600000000	355740300000000	281972600000000	273673100000000	594530400000000	394312700000000	537870200000000	391930200000000	21945450000000	37672220000000	598362300000000	343724200000000	288734800000000	365851500000000	465970300000000	426696500000000	333008900000000	268618300000000	3117299000000	306720500000000	31163410000000	339369800000000	258948300000000	172648100000000	105203600000000	448947100000000	322259900000000	431387100000000	168428500000000	141018100000000	168268900000000	793502000000000	706700200000000	736813300000000	176438400000000	617051900000000	110913700000000	324089800000000	58205090000000	280398400000000	134591900000000
K00880	176068000000000	26112060000000	166861400000000	104607400000000	600691900000000	8157717000000	18923160000000	180669300000000	159663900000000	66517660000000	774872800000000	984692000000000	171637500000000	144821900000000	203722700000000	117903900000000	691648800000000	725705600000000	223290400000000	118508200000000	111114500000000	744033300000000	827423700000000	6548324000000	114227900000000	903348400000000	783474600000000	599295300000000	779818600000000	87284650000000	323496100000000	437544900000000	171068300000000	205249400000000	115	244808700000000	178050900000000	203589000000000	187230700000000	126804200000000	226686200000000	379076700000000	361479500000000	102	155918900000000	159599700000000	370856600000000	659825600000000	261789500000000
K00881	177094300000000	6	3	262282900000000	292763200000000	785614200000000	128511100000000	173849900000000	11	24674270000000	166451900000000	235239700000000	452845500000000	7	118969100000000	259267500000000	173085000000000	150969500000000	157317100000000	128037700000000	924455600000000	353908300000000	280672000000000	193263900000000	858104600000000	451676800000000	123511100000000	201519200000000	132998300000000	322887000000000	160336300000000	101600200000000	615827300000000	821429800000000	572789200000000	726402300000000	100040100000000	826032900000000	100354400000000	907575300000000	706611100000000	7903232000000	116839900000000	348213200000000	659625800000000	718295500000000	920797800000000	418570900000000	701659800000000
K00882	3885775000000	153932800000000	184824000000000	144577800000000	854963600000000	164971700000000	104955100000000	370196200000000	319649300000000	240253700000000	192261000000000	188547000000000	327455500000000	248369400000000	287795700000000	296371200000000	170794600000000	231503100000000	398676200000000	212207600000000	183321400000000	222602200000000	300273500000000	208823800000000	219481400000000	15829490000000	220958300000000	275272900000000	205147900000000	247518500000000	404868500000000	397193300000000	136509300000000	957947500000000	650922200000000	131974000000000	865910200000000	103544700000000	535425900000000	3972548000000	416585900000000	945987600000000	266987000000000	908429200000000	949458600000000	698007400000000	130461100000000	217589300000000	231714300000000
K00883	93356520000000	260268900000000	5	796246500000000	643894700000000	278467700000000	27837650000000	900757100000000	840687200000000	573288800000000	510031200000000	74469940000000	57711360000000	801515500000000	665166600000000	791938600000000	521231400000000	564083100000000	119539900000000	65232130000000	730044400000000	479048800000000	785694800000000	499451100000000	683667000000000	429221200000000	71229950000000	496774900000000	745108400000000	430992000000000	182675400000000	137580800000000	773306100000000	116859800000000	744794500000000	943283300000000	118522600000000	886146700000000	117234500000000	112194100000000	918722600000000	107129500000000	131678400000000	476716300000000	769345200000000	822465200000000	111734800000000	597665800000000	903928800000000
K00884	214716600000000	754071700000000	486963500000000	186409400000000	247773300000000	299373200000000	193501300000000	2197466000000	184552600000000	700035600000000	445150500000000	687801900000000	182751200000000	152964900000000	154146100000000	512108200000000	701108000000000	616273000000000	24968350000000	151379100000000	120251100000000	747920400000000	914595500000000	733143600000000	108533600000000	115980100000000	148824700000000	581118600000000	579148500000000	676029200000000	157086100000000	109816400000000	639169700000000	99314360000000	668167900000000	824730200000000	9624978000000	799858500000000	998014500000000	956503500000000	729911700000000	818518300000000	120015300000000	40177680000000	632264200000000	686111400000000	958513500000000	517511600000000	701187000000000
K00885	0	0	0	0	0	5	0	0	0	1	1	0	0	1	2	1	3	0	0	0	0	1	0	0	0	1	0	2	0	2	842778000000000	817948700000000	807108400000000	129505800000000	190473700000000	142669900000000	824598900000000	303401800000000	2	665671000000000	324409900000000	280189900000000	6	0	2	110114400000000	186541700000000	110451100000000	4
K00886	266954800000000	215611300000000	307962200000000	115673600000000	657010100000000	385610700000000	143800000000000	310458000000000	197582200000000	235564400000000	194479400000000	184613400000000	640988000000000	360263800000000	357418300000000	457962900000000	293120200000000	288343400000000	225729400000000	140429800000000	103737000000000	15634420000000	365614100000000	216819500000000	130392200000000	119151900000000	165048500000000	349359600000000	220260500000000	276427700000000	351720600000000	375286200000000	25109510000000	126089400000000	410978600000000	210705600000000	240188500000000	113624200000000	16566890000000	6	128245400000000	122295100000000	414566700000000	162758800000000	869839600000000	494829800000000	148171200000000	119494500000000	243677200000000
K00887	525071000000000	164688000000000	270555600000000	200700800000000	891998700000000	218250300000000	157940500000000	507598200000000	444205000000000	305991800000000	251709000000000	316825700000000	386239200000000	336999200000000	342894700000000	385126300000000	275262000000000	339771600000000	595294100000000	298204300000000	264546300000000	359027400000000	401787700000000	316121200000000	338499100000000	261076700000000	32314570000000	323724500000000	285041200000000	36187210000000	272371600000000	436334400000000	268033300000000	126636300000000	633333300000000	174914100000000	383333300000000	7	533333300000000	912364900000000	616666700000000	5	294844300000000	661119200000000	113437300000000	566839700000000	225401200000000	267480100000000	243522200000000
K00891	479616500000000	177115400000000	238159900000000	175052500000000	820721000000000	168830200000000	138460800000000	469483700000000	393819700000000	27764060000000	226967700000000	224458600000000	438853500000000	351838000000000	336388700000000	338468200000000	247858000000000	265279100000000	514031900000000	28385560000000	235821400000000	233642300000000	360224500000000	255318100000000	276038000000000	206567100000000	307016200000000	300411700000000	235748500000000	278704200000000	516698400000000	649050800000000	362067000000000	162272800000000	112201600000000	17693700000000	170021500000000	174943300000000	100712000000000	646544400000000	875916700000000	830060000000000	495345700000000	141210400000000	278112100000000	741646800000000	207970500000000	307508900000000	484039700000000
K00892	0	0	0	0	0	0	0	0	0	0	0	0	0	0	0	0	0	0	0	0	0	0	0	0	0	0	1	0	0	0	267898700000000	147205100000000	113689900000000	0	0	15	163939600000000	110395500000000	740588300000000	170636400000000	982925900000000	314540300000000	7	1	316585400000000	2	0	0	98149830000000
K00893	0	2	0	0	0	351851900000000	0	0	0	4	0	0	0	0	0	4	2	1	0	0	0	0	0	1	0	0	0	0	0	1	142034800000000	1	3	1	0	0	0	0	0	0	1	0	0	0	0	1	0	5	0
K00895	50587560000000	206225900000000	778858000000000	250988800000000	17	211647800000000	53	489273000000000	457181200000000	109333300000000	765408200000000	516148900000000	808793400000000	795365000000000	132215300000000	39	125	371673100000000	420741400000000	299029300000000	197949100000000	827894200000000	10913260000000	109410700000000	21873640000000	223332900000000	326559100000000	802966400000000	696012700000000	939745400000000	208197700000000	305804000000000	304911100000000	150352400000000	102492600000000	195185900000000	753068600000000	174688900000000	816825200000000	14	16	429830400000000	35090630000000	113075700000000	287041800000000	34037610000000	789428200000000	11456120000000	35639410000000
K00897	200456900000000	216393500000000	253158600000000	836861800000000	223085900000000	19	445743300000000	17800620000000	149676300000000	502482400000000	57651530000000	448059700000000	149082600000000	144031800000000	18036140000000	428886000000000	174047800000000	288283300000000	211919700000000	953315500000000	114105300000000	553341200000000	919189200000000	532395900000000	12611390000000	84055620000000	104630500000000	517475300000000	401842100000000	475732800000000	690073900000000	711190500000000	251747300000000	848323500000000	815477700000000	11	756087800000000	65	75	35	0	65	22359400000000	5	7	255619900000000	14	19	281690100000000
K00899	18748880000000	699081800000000	208591600000000	245638900000000	919741500000000	750408300000000	97506530000000	158308200000000	172288800000000	160886600000000	138653600000000	161084200000000	124463100000000	100194800000000	218691900000000	200715300000000	193266000000000	170969400000000	250587000000000	10694720000000	157609600000000	167122400000000	125973700000000	141405600000000	155213400000000	106126100000000	127553200000000	134979100000000	147444500000000	157754800000000	851579800000000	734064400000000	538611300000000	123882500000000	812327500000000	114325700000000	208187800000000	27188590000000	160913000000000	99447230000000	155945800000000	257698900000000	275044800000000	75	195086000000000	986714900000000	115888100000000	466191400000000	442899900000000
K00901	548799600000000	167188000000000	271555600000000	200700800000000	891998700000000	234152600000000	162140700000000	5177584000000	460812500000000	312318900000000	256709000000000	330159100000000	392407800000000	339324100000000	348894100000000	386126300000000	275762000000000	340271600000000	622670800000000	323700400000000	273499900000000	362320100000000	404787700000000	325204100000000	358917400000000	28031630000000	341258400000000	328724500000000	28862460000000	37087210000000	637738800000000	65576990000000	44312240000000	167499900000000	135716500000000	216009300000000	108523200000000	105	869342000000000	119569800000000	111666700000000	901501500000000	625505600000000	141936000000000	238505800000000	9969194000000	320489400000000	35627350000000	499448900000000
K00906	0	0	0	0	0	0	0	0	0	1	0	0	0	0	0	0	0	0	0	0	0	0	0	0	0	0	1	0	1	0	118034600000000	497929800000000	323784200000000	0	0	6	102808500000000	286793900000000	72368530000000	187391500000000	141897300000000	478679600000000	3	0	25	2	1	1	130071100000000
K00912	565953200000000	159691200000000	455999700000000	12	105	748644700000000	481134400000000	55602850000000	438928000000000	705294100000000	657439100000000	577226300000000	242335600000000	258878600000000	184691200000000	573937800000000	37003640000000	384958600000000	502974300000000	295723700000000	220213800000000	686603800000000	115309000000000	820760700000000	245081100000000	221838300000000	324502900000000	577972300000000	491141800000000	665891200000000	240653700000000	212498700000000	230839900000000	123912500000000	802092800000000	13118620000000	785584500000000	811055300000000	530791300000000	255611400000000	322162300000000	694229600000000	304972100000000	762757900000000	190008700000000	304348300000000	877300100000000	155244700000000	251942200000000
K00917	918109500000000	408057100000000	622722400000000	381890500000000	247910900000000	568200000000000	241035600000000	881843800000000	751721400000000	633938800000000	442954000000000	494180000000000	984545000000000	740827600000000	766800100000000	941353700000000	471644700000000	693712800000000	814283200000000	452859000000000	338651300000000	518332600000000	818909000000000	476683400000000	457832200000000	354578100000000	495014500000000	818043400000000	531071900000000	645275500000000	776715400000000	869889100000000	243825200000000	22140950000000	128333300000000	270774900000000	228193700000000	145	123026800000000	737483600000000	5	189194600000000	606588500000000	219384400000000	208175100000000	237485800000000	257626900000000	805605100000000	39905540000000
K00918	0	0	0	1	0	5	0	0	0	0	3	1	0	0	0	0	2	1	0	0	0	2	25	5	0	0	0	4	0	4	0	0	0	0	0	0	0	0	0	0	0	0	0	0	0	0	0	0	0
K00919	376876900000000	146838200000000	177072300000000	13507520000000	700396500000000	1622934000000	11917900000000	385741200000000	315096500000000	242376400000000	198145700000000	184178500000000	336672600000000	276112900000000	261488800000000	293484200000000	208580100000000	207536800000000	408418200000000	221756100000000	181818800000000	211105900000000	306764200000000	227089100000000	218216500000000	175726300000000	24404080000000	255857400000000	201662500000000	232092300000000	487839800000000	576239500000000	324035400000000	203137300000000	935840400000000	225364500000000	156273300000000	183401700000000	112787300000000	552542200000000	595887300000000	800672900000000	497651000000000	155868400000000	284663800000000	668543300000000	204186900000000	245938600000000	416270300000000
K00925	521234300000000	202073500000000	256626300000000	151745000000000	929339500000000	213173900000000	15819270000000	479032400000000	432240800000000	306516700000000	259771300000000	261663700000000	426501100000000	309048000000000	337896200000000	364915800000000	259190800000000	291090100000000	502859300000000	293451200000000	257529400000000	28642540000000	3962903000000	303279800000000	296931200000000	236159600000000	307015700000000	358144100000000	272938500000000	325671100000000	108456100000000	111787600000000	636654700000000	486436000000000	381668800000000	557246900000000	347089100000000	327243600000000	334857700000000	337249800000000	353486400000000	464305100000000	950156700000000	25710650000000	50182630000000	10676390000000	475474100000000	444193100000000	709696000000000
K00926	305016700000000	867037900000000	157542600000000	107253800000000	6411165000000	626693000000000	693791800000000	272762900000000	245243500000000	135969400000000	110110200000000	99603060000000	181028000000000	15855150000000	1986994000000	150297200000000	972383200000000	114108400000000	296356700000000	169731900000000	144420300000000	119636900000000	160159600000000	120475200000000	166258400000000	120359000000000	163230800000000	143783600000000	114922100000000	133740400000000	358415000000000	267399400000000	161252400000000	216148000000000	135614600000000	181318700000000	216821400000000	164659200000000	221590300000000	219296300000000	162172600000000	192931700000000	24554010000000	764756500000000	153151700000000	198162500000000	214873000000000	128142000000000	195341100000000
K00927	824405700000000	295733300000000	345915700000000	249461600000000	120665700000000	299097600000000	216472300000000	766644200000000	68658280000000	465261000000000	37871560000000	367814400000000	582552100000000	469383000000000	534480700000000	542341000000000	367195200000000	439811800000000	82953280000000	463081500000000	407320000000000	448095400000000	600408500000000	451929400000000	469877600000000	357291400000000	505864700000000	529583800000000	405267100000000	478047800000000	95341450000000	131140700000000	703332700000000	40581000000000	261818600000000	449576400000000	191472600000000	300091200000000	152222200000000	10096240000000	129662600000000	167727900000000	941859200000000	290304100000000	521688300000000	137274700000000	362866000000000	508521100000000	853357300000000
K00928	722049000000000	299635200000000	347551200000000	246589800000000	128290500000000	270092800000000	192822700000000	666440900000000	604510500000000	383545800000000	330191900000000	311539300000000	526666700000000	436818500000000	509100900000000	492389800000000	317274100000000	367547300000000	717663000000000	408355800000000	351068900000000	363930700000000	484743100000000	375324900000000	402317300000000	326576500000000	454207200000000	433559500000000	341049000000000	408889300000000	119674900000000	148430600000000	105212400000000	538562200000000	284582100000000	570984000000000	379068700000000	55800010000000	298330000000000	138548400000000	172799600000000	220412400000000	131607300000000	422593500000000	865201500000000	157879200000000	418303100000000	624047100000000	111034000000000
K00929	895397600000000	260754700000000	188164800000000	23949510000000	833909500000000	240331900000000	213372700000000	853329400000000	723124200000000	391003900000000	330191500000000	332836900000000	639127700000000	480970800000000	473976400000000	321730800000000	361813000000000	249874200000000	101274900000000	514530500000000	431217900000000	401047900000000	531708100000000	419606300000000	505769200000000	434532900000000	608311700000000	372698300000000	329192700000000	397015800000000	345274600000000	483858700000000	40407660000000	926357900000000	585835100000000	13266610000000	758901400000000	168827100000000	586872100000000	208093900000000	269281800000000	394548600000000	423249000000000	144835000000000	325211400000000	293255100000000	688328500000000	100671300000000	464095100000000
K00930	950327300000000	335292700000000	427587700000000	318410100000000	167914000000000	371676300000000	241832700000000	889119700000000	769224700000000	527379600000000	433281000000000	428630600000000	717145400000000	579245200000000	630964700000000	655426100000000	422936700000000	47161470000000	939143600000000	534251100000000	461733400000000	491399700000000	671826900000000	510392600000000	5160747000000	405581900000000	576066000000000	590479800000000	449109400000000	540588800000000	120746100000000	138157500000000	810170600000000	379980800000000	235514500000000	44745660000000	283744400000000	316182400000000	204656800000000	174876300000000	141117400000000	198860700000000	947910000000000	305066000000000	512907000000000	13453990000000	400812700000000	516830300000000	84878750000000
K00931	333404900000000	11959790000000	155793300000000	956917600000000	550713900000000	157748600000000	991630000000000	326908500000000	279778000000000	203134200000000	162030300000000	169116300000000	34391980000000	315795800000000	253207400000000	284066900000000	234226600000000	19619830000000	353418100000000	191365000000000	15582410000000	191644500000000	284467100000000	18677530000000	190483800000000	150024100000000	21719440000000	249036400000000	194212100000000	205658500000000	571101200000000	652875200000000	408686500000000	225080400000000	118786900000000	25660830000000	156772600000000	196055300000000	126910400000000	781439800000000	78207120000000	111545600000000	529174800000000	16622790000000	337113600000000	720347800000000	195499600000000	27165850000000	521349800000000
K00932	103107500000000	834652800000000	18181800000000	0	0	10044740000000	407338700000000	214263500000000	802990100000000	150455200000000	14	907504500000000	237864200000000	964064800000000	110662100000000	201322200000000	903902500000000	12	928784700000000	3521880000000	504850600000000	706913800000000	225982800000000	604683700000000	608404500000000	12	180768600000000	151417300000000	8	100262000000000	468623300000000	266938100000000	140632700000000	219293800000000	202601500000000	260478300000000	193414900000000	141016700000000	209558400000000	26754750000000	266743800000000	376885800000000	27723730000000	660353600000000	939691300000000	65071540000000	220317600000000	862477800000000	167675500000000
K00933	384353100000000	198049000000000	112938300000000	131301400000000	123591500000000	404307100000000	274490800000000	379880600000000	356636500000000	579818600000000	46447060000000	492617800000000	389604100000000	237289100000000	31832780000000	719505400000000	366297500000000	52594510000000	387770700000000	32535270000000	256069300000000	675324200000000	734828000000000	601131900000000	250132600000000	236685900000000	237271900000000	626749600000000	461664300000000	665162900000000	269324600000000	49968020000000	171093100000000	532454300000000	182295000000000	473094700000000	451351400000000	12	771354200000000	201426900000000	259520300000000	194997900000000	303854800000000	9	139897800000000	258985300000000	614144400000000	969317500000000	208911800000000
K00934	384353100000000	198049000000000	112938300000000	131301400000000	123591500000000	404307100000000	274490800000000	379880600000000	356636500000000	579818600000000	46447060000000	492617800000000	389604100000000	237289100000000	31832780000000	719505400000000	366297500000000	52594510000000	387770700000000	32535270000000	256069300000000	675324200000000	734828000000000	601131900000000	250132600000000	236685900000000	237271900000000	626749600000000	461664300000000	665162900000000	269324600000000	49968020000000	171093100000000	532454300000000	182295000000000	473094700000000	451351400000000	12	771354200000000	201426900000000	259520300000000	194997900000000	303854800000000	9	139897800000000	258985300000000	614144400000000	969317500000000	208911800000000
K00936	88909040000000	473670100000000	766708700000000	291914900000000	160896700000000	817575500000000	386293200000000	952981300000000	659960100000000	750967400000000	586556700000000	526448900000000	150006200000000	70248370000000	852417800000000	11416060000000	484279500000000	703972300000000	665476700000000	379590300000000	321804800000000	462437100000000	107575000000000	662216800000000	447864700000000	365612700000000	533849800000000	959088500000000	646625400000000	732557300000000	16638160000000	258501900000000	107022300000000	628648400000000	341710000000000	568695700000000	792900700000000	427992200000000	637820700000000	345	292964900000000	301177300000000	111032100000000	411506700000000	538537000000000	365836200000000	817330200000000	142924700000000	107748600000000
K00937	105512300000000	421916900000000	556271500000000	329696000000000	179472700000000	465528300000000	322158300000000	10370190000000	885233800000000	624447700000000	502645700000000	491309400000000	809059300000000	690829600000000	743561500000000	795640600000000	46211740000000	584220000000000	10623460000000	60445280000000	517994800000000	575035500000000	790660400000000	597170400000000	610825100000000	474277800000000	650873000000000	723566700000000	544873300000000	642408000000000	12349920000000	145855300000000	987819700000000	581490200000000	366445400000000	639607000000000	444427500000000	449440400000000	310804600000000	199480300000000	198770700000000	242533000000000	122575000000000	390266600000000	754037700000000	177142700000000	509624100000000	70918980000000	106781400000000
K00938	631298000000000	308094900000000	416250000000000	315111800000000	766666700000000	1	583333300000000	343748400000000	609788900000000	605601200000000	109590800000000	129573200000000	73724480000000	136205700000000	550047400000000	849831300000000	85	528403500000000	405155300000000	22961720000000	413996500000000	944506200000000	815352100000000	115233000000000	361460200000000	299397400000000	295350800000000	599832500000000	172831500000000	988549000000000	247187000000000	179947500000000	684380600000000	2	1	407210000000000	1	1	0	0	0	5	315352100000000	1	131666700000000	443002800000000	0	196636800000000	605702300000000
K00939	318579500000000	118728900000000	130674500000000	957134900000000	484393900000000	113528700000000	893997800000000	28423360000000	257368900000000	173956900000000	149219600000000	14170280000000	228758000000000	162896200000000	201742900000000	201302300000000	1405669000000	165266900000000	317158000000000	180429800000000	162140300000000	169259100000000	211645200000000	171467200000000	182709800000000	137672900000000	185651000000000	183785300000000	161919800000000	177751600000000	48891870000000	673899600000000	34022350000000	16064130000000	105446400000000	176606200000000	114496900000000	166433200000000	774600100000000	748933600000000	935056400000000	113725000000000	415335700000000	128226200000000	246699100000000	561535500000000	150601300000000	199135200000000	43762010000000
K00940	218186000000000	901776000000000	135712400000000	499226000000000	386654300000000	946306700000000	590125000000000	194443100000000	182637500000000	115353800000000	939764900000000	101527700000000	222240200000000	15411590000000	131386700000000	172508800000000	124326600000000	130406300000000	246123100000000	137226400000000	99041850000000	12178160000000	170974800000000	115092700000000	105321800000000	708397100000000	125543600000000	146920000000000	950615800000000	133569200000000	844696000000000	597731100000000	451865200000000	309788800000000	177494600000000	378868400000000	262373400000000	177499400000000	152451200000000	230821600000000	136508200000000	183043800000000	769774200000000	141514200000000	523262600000000	580902600000000	196401000000000	209176800000000	600149100000000
K00941	375531200000000	156101700000000	179330200000000	139332800000000	742756300000000	163198400000000	122379500000000	359521600000000	325618400000000	237123100000000	184987400000000	20050500000000	273908300000000	226367300000000	267651500000000	284050200000000	195953200000000	231373300000000	387027100000000	218657600000000	185577600000000	232945100000000	293906100000000	22345510000000	211042700000000	176495200000000	219143500000000	261574000000000	198739300000000	245849500000000	450665800000000	588411500000000	329171900000000	20485680000000	138161100000000	222944700000000	134641500000000	205228300000000	812795000000000	576348400000000	837840300000000	979684900000000	462394600000000	146770700000000	253658800000000	782628900000000	186259900000000	253591200000000	366650100000000
K00942	478376700000000	266952200000000	34525040000000	141489700000000	109280400000000	270041300000000	183535400000000	468619600000000	400526500000000	327801800000000	281626100000000	264979700000000	453928500000000	283349500000000	419372000000000	458953500000000	237537600000000	30505650000000	455562800000000	263998800000000	238534400000000	267184900000000	404321900000000	290497600000000	283665900000000	224716400000000	276382200000000	381736500000000	278244400000000	329237500000000	465399800000000	726446100000000	352781000000000	209818500000000	126635700000000	208622900000000	213032300000000	176402500000000	139680600000	598327800000000	863004700000000	104565800000000	473960100000000	13751880000000	247444300000000	749376000000000	22651790000000	365779700000000	41723760000000
K00943	206847800000000	852344300000000	107735300000000	517026800000000	293265900000000	108292200000000	790391600000000	199032000000000	164734300000000	126934700000000	104768100000000	991440900000000	256221200000000	211065400000000	170116200000000	181202500000000	154936500000000	134020800000000	212873900000000	114804200000000	87554440000000	103708300000000	173694400000000	119358300000000	102909400000000	101074700000000	134244700000000	148736900000000	117215800000000	129993600000000	379206600000000	443262100000000	289374000000000	109830400000000	661551500000000	134270800000000	924069500000000	138323200000000	780123700000000	353235700000000	31317510000000	545975800000000	363307400000000	972546300000000	22001290000000	368779000000000	113701500000000	160234500000000	312069800000000
K00945	811193400000000	325420600000000	369758200000000	246629500000000	125763100000000	359990800000000	25959310000000	787560800000000	672712100000000	500538800000000	414931600000000	42277360000000	723906900000000	546596400000000	597308500000000	611758100000000	395091200000000	464077500000000	829771900000000	47410610000000	392290600000000	460292100000000	631822800000000	476463800000000	464617500000000	361347400000000	517780100000000	569988000000000	429419100000000	519544100000000	120413200000000	138569600000000	869738600000000	365479400000000	252020200000000	457370900000000	285280400000000	358443500000000	230666200000000	106184900000000	117456100000000	159748100000000	120932000000000	319572900000000	707869000000000	132401800000000	4089959000000	558179700000000	107449700000000
K00946	393457400000000	136275700000000	596245300000000	15	125	122134000000000	744820300000000	393831400000000	349883400000000	643081200000000	64511440000000	602163700000000	790001700000000	674385600000000	655295500000000	584770800000000	487132300000000	458049200000000	29852790000000	195732400000000	180306600000000	914089100000000	108761500000000	781429100000000	200151800000000	209741500000000	303355800000000	541274600000000	469265500000000	82662690000000	230782700000000	21387120000000	269927400000000	103507800000000	650883600000000	102459300000000	553761500000000	103411500000000	326640100000000	377673600000000	312137400000000	546768300000000	234396700000000	646158100000000	217011100000000	405900700000000	854117100000000	119849500000000	297645400000000
K00948	674457500000000	279358000000000	367181600000000	276268700000000	120363400000000	282565300000000	194629200000000	61564920000000	557186400000000	391083700000000	337575000000000	319055700000000	51096280000000	403308300000000	482664400000000	501294800000000	307130200000000	365872100000000	61573570000000	351236200000000	323047900000000	346346100000000	479541500000000	358950800000000	365097900000000	299336700000000	37924080000000	432165800000000	333018800000000	388098100000000	824081900000000	967425700000000	516260100000000	292630900000000	181829600000000	326248900000000	228627100000000	23874380000000	161527600000000	896561600000000	883275000000000	107924900000000	667805500000000	188378700000000	352678000000000	106284300000000	262416400000000	368907000000000	657179200000000
K00949	350367400000000	170157900000000	198072500000000	107930700000000	850600200000000	168039800000000	122182800000000	333875800000000	297109100000000	227130500000000	184528800000000	185160800000000	276845000000000	207611900000	23300590000000	279686700000000	179751400000000	205182800000000	350890000000000	205743200000000	174270500000000	196026700000000	286160900000000	224506800000000	205026900000000	15385250000000	219021900000000	26458580000000	188774200000000	216131600000000	534385800000000	672572800000000	489145900000000	263843600000000	153545000000000	319778500000000	135457600000000	207931700000000	1148539000000	57664890000000	577649900000000	93275850000000	548686900000000	181438300000000	356334000000000	771310500000000	206336200000000	302986300000000	65674800000000
K00950	690997300000000	289171800000000	386897000000000	228133400000000	13519250000000	34237760000000	202136100000000	717531000000000	590019700000000	438293800000000	352466600000000	344148300000000	770525200000000	603932300000000	550873500000000	602718100000000	432568100000000	409339600000000	699844200000000	416755100000000	347095000000000	360423300000000	56124780000000	390907600000000	398817400000000	330142300000000	417288300000000	511660800000000	375488800000000	439680300000000	916188900000000	112441800000000	573236800000000	335440600000000	186913700000000	340851500000000	334645100000000	340832200000000	262320100000000	122211900000000	15309760000000	180411800000000	909974400000000	25088370000000	477143600000000	128098900000000	359085100000000	438478200000000	718992400000000
K00951	117153600000000	402097800000000	539280800000000	368715600000000	186895400000000	419411800000000	323795000000000	109691600000000	983904200000000	62602240000000	527138000000000	508562100000000	691928300000000	576056800000000	722347600000000	694020700000000	426112200000000	541497000000000	111922700000000	618570500000000	572058900000000	591902700000000	764242300000000	586942400000000	637647400000000	523388000000000	698021600000000	68255220000000	52834490000000	635467900000000	198210700000000	219292800000000	163579800000000	829858400000000	459161500000000	874832800000000	47175010000000	703999300000000	398398500000000	169724000000000	210668800000000	297074100000000	190971400000000	589149000000000	13195470000000	242605000000000	632755500000000	983515300000000	193408500000000
K00952	374649700000000	185503700000000	75	434227500000000	833333300000000	536497300000000	45	341831600000000	365548900000000	19410350000000	150163400000000	161083200000000	48620180000000	585442700000000	353152000000000	132143400000000	75	143904700000000	462949300000000	288811700000000	432162700000000	167896600000000	158250400000000	216297600000000	271999500000000	208763700000000	19833080000000	846833000000000	20581530000000	113667600000000	3	883162200000000	433333300000000	3	5	25	1	1	0	0	0	0	306329100000000	5	2	13254890000000	0	1	55
K00954	16627160000000	746110400000000	809326100000000	575188400000000	351855700000000	738452300000000	470517900000000	15410420000000	139531400000000	104254400000000	860201500000000	882990600000000	156936000000000	111965600000000	129815100000000	134623600000000	960348000000000	970774900000000	169255700000000	988703000000000	766984400000000	921398100000000	133271700000000	989791600000000	955709800000000	745096700000000	102917000000000	123129800000000	847138100000000	111074900000000	275321000000000	273251400000000	212750600000000	877886600000000	505021100000000	831706800000000	810947600000000	695883100000000	479750500000000	300216900000000	308590800000000	416073900000000	259579300000000	674175400000000	13163760000000	341032500000000	97705530000000	124505100000000	245632100000000
K00955	297556300000000	720138100000000	159474100000000	1244948000000	668074300000000	120528800000000	493184000000000	278854700000000	26728740000000	18308170000000	155367400000000	149378300000000	694638300000000	744758100000000	158213400000000	190361800000000	914891600000000	160524200000000	294373600000000	177041800000000	15676630000000	18820730000000	195719300000000	179060500000000	189489000000000	146768000000000	162777800000000	171545000000000	156986400000000	174777700000000	38190320000000	41125040000000	282853300000000	184015400000000	109446000000000	200752000000000	979342500000000	141239700000000	631764000000000	535576900000000	532003700000000	717889200000000	35401000000000	892367200000000	286958400000000	699230900000000	15572120000000	209862300000000	319499400000000
[truncated: 6,614 more rows]
[truncated: 5 more columns]

## Sheet: S6 Metagenomics Dataset
Condition	Control	Control	Control	Control	Control	Control	Apple	Apple	Apple	Apple	Apple	Apple	Apple_pectin	Apple_pectin	Apple_pectin	Apple_pectin	Apple_pectin	Apple_pectin	Cellulose	Cellulose	Cellulose	Cellulose	Cellulose	Cellulose	Control	Control	Control	Control	Control	Control	Apple	Apple	Apple	Apple	Apple	Apple	Apple_pectin	Apple_pectin	Apple_pectin	Apple_pectin	Apple_pectin	Apple_pectin	Cellulose	Cellulose	Cellulose	Cellulose	Cellulose	Cellulose	Donor
[truncated: 358 more rows]
[truncated: 5 more columns]

[truncated: 7 more sheets: S7 _ LCMS , S8 _ GCMS, S9 Tukey's multiple comparison, S10 MAASLIN_species, S11 LIMMA_Met, S12 MAASLIN_KO, S13 Co-culture in-silico ]
