# Supplementary material for: Tailored impact of dietary fibers on gut microbiota: a multi-omics comparison on the lean and obese microbial communities
Source: Research Square preprint supplement (doi:10.21203/rs.3.rs-4712683/v1), 2024-08-08
Supplement: Supplementary file 1 [file b1d19d4b3c317eba37c8c3a6.pdf]

## Microcolonic *in-vitro* fermentation and multi-omics analysis

## Apple *in-vitro* digestion

## Targeted Metabolomics

# Multi-Omics Data Integration

## Apple pectin

### Synthesis of indole phenolic acids (e.g. IPA, ILA)

**Depletion of essential amino acids  
(e.g. phenylalanine, tyrosine, methionine)**

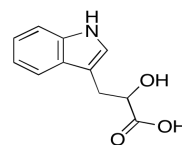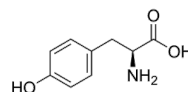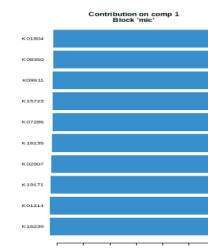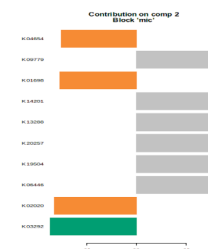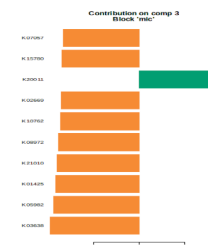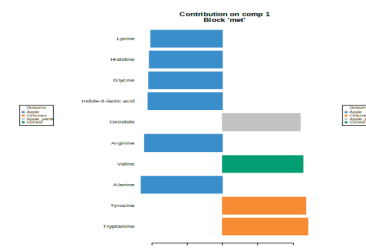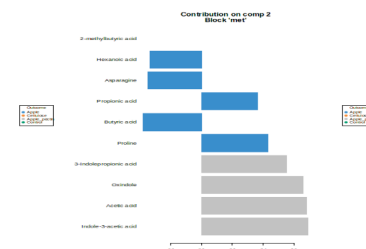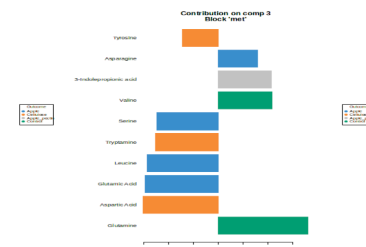

## Tailored dietary intervention targeting on the obese gut microbiota in comparison to a lean one
